# Supplementary material for: Single-Cell Atlas of the Chinese Tongue Sole (Cynoglossus semilaevis) Ovary Reveals Transcriptional Programs of Oogenesis in Fish
Source: Front Cell Dev Biol. 2022 Mar 1;10:828124. doi: 10.3389/fcell.2022.828124 (PMC8921555; doi:10.3389/fcell.2022.828124)
Supplement: Supplementary file 7 [file DataSheet1.XLSX]

## Sheet: Early oogonia
Gene	p_val	avg_logFC	pct.1	pct.2	p_val_adj	cluster
nop58	7.28624e-157	26.9981	0.966	0.301	1.52406e-152	Early_oogonia
LOC103383283	3.1092e-150	14.9583	0.926	0.25	6.50351e-146	Early_oogonia
ybx2	9.4372e-140	36.4353	1	0.486	1.97398e-135	Early_oogonia
LOC103398418	1.35401e-133	13.0381	0.892	0.249	2.83218e-129	Early_oogonia
LOC103395839	2.02204e-128	10.4799	0.824	0.204	4.22951e-124	Early_oogonia
gtf3a	1.02871e-126	40.6628	0.99	0.58	2.15176e-122	Early_oogonia
LOC103379662	8.65346e-119	0.976961	0.564	0.085	1.81004e-114	Early_oogonia
nop56	5.86786e-114	11.0199	0.941	0.387	1.22738e-109	Early_oogonia
elavl2	4.27872e-113	12.4845	0.917	0.32	8.9498e-109	Early_oogonia
LOC103397827	5.35872e-112	2.87328	0.735	0.174	1.12088e-107	Early_oogonia
LOC103398386	8.01405e-110	67.361	0.99	0.738	1.6763e-105	Early_oogonia
LOC103395728	1.05511e-107	0.643585	0.27	0.019	2.20698e-103	Early_oogonia
LOC103385160	2.03647e-106	52.5324	1	0.861	4.25968e-102	Early_oogonia
senp3	4.51054e-101	3.70835	0.441	0.06	9.43469e-97	Early_oogonia
nufip1	1.4092e-95	26.3732	0.892	0.375	2.94761e-91	Early_oogonia
igf2bp3	3.65393e-94	4.69537	0.76	0.215	7.64292e-90	Early_oogonia
c8h11orf98	6.66467e-92	29.0845	0.946	0.468	1.39405e-87	Early_oogonia
tdrd9	4.95881e-91	0.635183	0.569	0.112	1.03723e-86	Early_oogonia
LOC103393952	1.2322e-89	4.27896	0.745	0.217	2.57739e-85	Early_oogonia
LOC103380924	4.92442e-87	1.47383	0.451	0.072	1.03004e-82	Early_oogonia
snapc4	2.42426e-86	0.788503	0.422	0.062	5.07083e-82	Early_oogonia
esco2	8.85892e-86	1.65142	0.431	0.067	1.85302e-81	Early_oogonia
LOC103396247	9.91981e-86	11.8926	0.961	0.568	2.07493e-81	Early_oogonia
LOC103381447	1.32987e-85	8.24178	0.882	0.384	2.78169e-81	Early_oogonia
LOC103397052	1.62898e-85	17.6521	0.892	0.378	3.40734e-81	Early_oogonia
lsm4	1.39124e-84	5.74877	0.809	0.272	2.91005e-80	Early_oogonia
LOC103393113	1.6697e-83	198.475	0.995	0.824	3.49252e-79	Early_oogonia
LOC103397377	1.17471e-82	2.79826	0.593	0.135	2.45713e-78	Early_oogonia
LOC103394108	9.36355e-81	2.09542	0.495	0.094	1.95857e-76	Early_oogonia
mllt11	8.96261e-80	0.696611	0.299	0.034	1.87471e-75	Early_oogonia
elovl7	1.9564e-79	7.18869	0.647	0.173	4.09219e-75	Early_oogonia
ppat	1.50537e-78	1.61584	0.49	0.095	3.14879e-74	Early_oogonia
rtcb	2.6523e-78	3.1699	0.525	0.11	5.54783e-74	Early_oogonia
LOC103385684	1.38828e-76	7.08113	0.819	0.31	2.90387e-72	Early_oogonia
vrtn	3.30188e-76	0.765888	0.377	0.056	6.90653e-72	Early_oogonia
larp6	3.38748e-76	4.02592	0.77	0.265	7.08559e-72	Early_oogonia
gtf2a1	1.77054e-74	3.63631	0.676	0.2	3.70344e-70	Early_oogonia
lsm12	1.70683e-73	6.22183	0.877	0.412	3.57017e-69	Early_oogonia
cdc20	1.04284e-70	4.50685	0.956	0.568	2.18131e-66	Early_oogonia
incenp	9.3758e-70	1.49346	0.441	0.084	1.96114e-65	Early_oogonia
ebna1bp2	1.18393e-64	4.59957	0.701	0.241	2.47643e-60	Early_oogonia
LOC103384013	1.25243e-63	4.21954	0.98	0.72	2.6197e-59	Early_oogonia
LOC103387420	3.31284e-63	2.48829	0.525	0.127	6.92946e-59	Early_oogonia
LOC103397141	1.75499e-61	2.07224	0.544	0.14	3.67091e-57	Early_oogonia
lsm7	1.41787e-60	10.9634	0.828	0.408	2.96575e-56	Early_oogonia
rgs14	1.51457e-60	3.19123	0.76	0.288	3.16803e-56	Early_oogonia
LOC103377398	5.77017e-60	189.53	1	0.859	1.20695e-55	Early_oogonia
nop2	1.14853e-59	2.62194	0.701	0.238	2.40238e-55	Early_oogonia
ccne1	1.47151e-59	1.41458	0.368	0.067	3.07796e-55	Early_oogonia
ddx6	2.19976e-57	2.8354	0.647	0.223	4.60124e-53	Early_oogonia
pfn2	4.69906e-57	6.22676	0.873	0.476	9.82903e-53	Early_oogonia
tardbp	1.98996e-56	2.08303	0.431	0.097	4.1624e-52	Early_oogonia
LOC103397606	3.77637e-56	1.01646	0.377	0.074	7.89903e-52	Early_oogonia
LOC103390638	1.18478e-55	4.11859	0.672	0.246	2.4782e-51	Early_oogonia
eif3j	1.3266e-55	1.35202	0.559	0.158	2.77484e-51	Early_oogonia
rbbp6	2.60541e-55	0.878292	0.299	0.048	5.44973e-51	Early_oogonia
LOC103378063	3.68003e-55	5.94588	0.858	0.44	7.69752e-51	Early_oogonia
rrp8	4.10516e-55	2.42035	0.5	0.131	8.58676e-51	Early_oogonia
g3bp2	4.34215e-55	4.916	0.676	0.253	9.08247e-51	Early_oogonia
LOC103388495	1.23141e-54	2.70551	0.686	0.253	2.57574e-50	Early_oogonia
LOC103387234	1.72534e-54	1.24915	0.451	0.107	3.6089e-50	Early_oogonia
patl2	3.86083e-54	0.810018	0.505	0.129	8.07569e-50	Early_oogonia
dkc1	1.59155e-53	0.869312	0.819	0.366	3.32905e-49	Early_oogonia
LOC103386097	2.27801e-53	13.5131	0.917	0.513	4.7649e-49	Early_oogonia
rpa1	6.60997e-53	6.89379	0.676	0.246	1.38261e-48	Early_oogonia
LOC103396445	8.54746e-53	1.41628	0.539	0.155	1.78787e-48	Early_oogonia
LOC103384692	1.06806e-52	3.58937	0.75	0.297	2.23407e-48	Early_oogonia
LOC103396910	2.20376e-52	1.43214	0.505	0.134	4.60961e-48	Early_oogonia
nom1	1.25101e-51	1.56592	0.485	0.129	2.61674e-47	Early_oogonia
znf217	6.64455e-51	0.640447	0.265	0.041	1.38984e-46	Early_oogonia
polr3b	1.97987e-50	1.1117	0.392	0.087	4.14129e-46	Early_oogonia
thumpd1	2.03411e-50	2.59163	0.583	0.189	4.25475e-46	Early_oogonia
LOC107988351	1.0175e-49	0.552022	0.309	0.055	2.1283e-45	Early_oogonia
cpeb1	3.58261e-49	0.744265	0.804	0.378	7.49375e-45	Early_oogonia
LOC103377182	9.71737e-49	7.86188	0.946	0.695	2.03258e-44	Early_oogonia
prkrip1	2.2453e-48	0.974478	0.422	0.103	4.6965e-44	Early_oogonia
ddx1	1.09998e-47	3.22186	0.618	0.221	2.30083e-43	Early_oogonia
eif2s2	2.45145e-47	5.84966	0.73	0.367	5.1277e-43	Early_oogonia
rtraf	6.51166e-47	5.12962	0.672	0.273	1.36204e-42	Early_oogonia
LOC103383835	1.82928e-46	1.99743	0.529	0.165	3.82631e-42	Early_oogonia
henmt1	3.89207e-46	0.938433	0.397	0.094	8.14104e-42	Early_oogonia
LOC107988646	1.58731e-45	1.21795	0.588	0.199	3.32018e-41	Early_oogonia
LOC103388038	1.3888e-43	1.66413	0.618	0.235	2.90496e-39	Early_oogonia
sart1	1.66685e-43	3.02847	0.657	0.272	3.48656e-39	Early_oogonia
LOC103390711	1.04177e-42	1.61604	0.961	0.702	2.17906e-38	Early_oogonia
LOC103389806	2.26597e-42	2.44007	0.627	0.247	4.73972e-38	Early_oogonia
LOC112487726	2.76229e-42	1.74768	0.681	0.285	5.77789e-38	Early_oogonia
LOC103395826	4.77547e-42	1.25002	0.466	0.136	9.98886e-38	Early_oogonia
LOC103396192	1.14477e-41	0.748585	0.328	0.072	2.39451e-37	Early_oogonia
LOC103379187	6.60919e-41	2.03984	0.49	0.155	1.38244e-36	Early_oogonia
LOC103398252	8.22921e-41	5.89564	0.676	0.285	1.7213e-36	Early_oogonia
snrpb	2.49038e-40	6.12693	0.946	0.741	5.20913e-36	Early_oogonia
LOC103391498	6.56584e-40	0.720333	0.75	0.357	1.37338e-35	Early_oogonia
dnttip2	7.45062e-40	1.4462	0.485	0.155	1.55845e-35	Early_oogonia
LOC103383370	9.98919e-40	0.443221	0.299	0.062	2.08944e-35	Early_oogonia
LOC103388305	1.34312e-39	3.12975	0.657	0.293	2.80941e-35	Early_oogonia
LOC103398887	1.75927e-39	4.1615	0.843	0.476	3.67987e-35	Early_oogonia
fam168b	1.85126e-39	1.99173	0.505	0.169	3.87228e-35	Early_oogonia
baiap2	7.66259e-39	1.21473	0.426	0.125	1.60278e-34	Early_oogonia
LOC103378513	2.00999e-38	1.52812	0.426	0.124	4.20429e-34	Early_oogonia
LOC103390124	3.42575e-38	0.407193	0.324	0.074	7.16564e-34	Early_oogonia
LOC112486234	5.51781e-38	1.56158	0.686	0.321	1.15416e-33	Early_oogonia
ptges3	9.75426e-38	1.38591	0.716	0.347	2.0403e-33	Early_oogonia
LOC103380254	1.2879e-37	1.4068	0.5	0.165	2.6939e-33	Early_oogonia
LOC103385488	1.82482e-37	1.08545	0.74	0.372	3.81698e-33	Early_oogonia
LOC103394238	4.26273e-37	0.581403	0.338	0.083	8.91635e-33	Early_oogonia
LOC112487970	5.19718e-37	1.77821	0.49	0.161	1.08709e-32	Early_oogonia
LOC103391088	2.64295e-36	1.35118	0.382	0.104	5.52826e-32	Early_oogonia
ddx49	3.46351e-36	2.0586	0.627	0.268	7.24463e-32	Early_oogonia
gpatch4	8.25136e-36	1.17321	0.588	0.231	1.72594e-31	Early_oogonia
ssb	9.12578e-36	1.29567	0.534	0.198	1.90884e-31	Early_oogonia
hspd1	9.28438e-36	3.70744	0.623	0.279	1.94201e-31	Early_oogonia
brd9	1.35938e-35	0.701416	0.446	0.139	2.84341e-31	Early_oogonia
mrpl1	1.60057e-35	0.617981	0.397	0.115	3.34792e-31	Early_oogonia
anp32e	2.35519e-35	5.22813	0.676	0.328	4.92634e-31	Early_oogonia
LOC103386382	2.56005e-35	2.00839	0.897	0.574	5.35485e-31	Early_oogonia
LOC103389168	4.5539e-35	1.69535	0.564	0.226	9.5254e-31	Early_oogonia
LOC103391169	6.07142e-35	0.673929	0.348	0.096	1.26996e-30	Early_oogonia
LOC103394065	1.75756e-34	2.20064	0.676	0.323	3.67628e-30	Early_oogonia
dnaja2	2.45894e-34	2.0673	0.667	0.329	5.14337e-30	Early_oogonia
mphosph10	2.64675e-34	1.605	0.5	0.181	5.5362e-30	Early_oogonia
LOC103384163	2.71726e-34	6.74332	0.662	0.338	5.68368e-30	Early_oogonia
dapl1	4.11189e-34	8.51429	0.75	0.374	8.60085e-30	Early_oogonia
mthfsd	5.30074e-34	0.971375	0.319	0.08	1.10876e-29	Early_oogonia
LOC103388422	8.01925e-34	2.17577	0.73	0.372	1.67739e-29	Early_oogonia
prpf31	2.07375e-33	1.49729	0.446	0.146	4.33767e-29	Early_oogonia
LOC103382154	2.85201e-33	43.5328	0.995	0.895	5.96555e-29	Early_oogonia
LOC103394237	3.42108e-33	3.32546	0.784	0.434	7.15587e-29	Early_oogonia
rexo2	4.43927e-33	3.43712	0.711	0.357	9.28562e-29	Early_oogonia
LOC103388539	4.91571e-33	0.976721	0.382	0.112	1.02822e-28	Early_oogonia
cwc22	5.4156e-33	1.25441	0.51	0.194	1.13278e-28	Early_oogonia
ranbp1	6.58399e-33	1.91989	0.466	0.158	1.37717e-28	Early_oogonia
galnt17	7.10114e-33	1.52208	0.422	0.138	1.48534e-28	Early_oogonia
fkbp3	1.07405e-32	2.39299	0.529	0.206	2.24659e-28	Early_oogonia
c8h7orf50	1.34689e-32	1.57526	0.446	0.15	2.8173e-28	Early_oogonia
ube2w	1.49894e-32	1.7238	0.471	0.16	3.13532e-28	Early_oogonia
cdc25b	2.61505e-32	2.17673	0.569	0.239	5.46991e-28	Early_oogonia
ddx24	1.43577e-31	1.96197	0.431	0.144	3.0032e-27	Early_oogonia
srp19	1.69197e-31	1.05676	0.422	0.139	3.53909e-27	Early_oogonia
ilf2	2.94576e-31	2.30935	0.603	0.266	6.16165e-27	Early_oogonia
tbp	1.12534e-30	0.582557	0.284	0.071	2.35387e-26	Early_oogonia
ppp4c	1.74449e-30	0.834399	0.471	0.171	3.64895e-26	Early_oogonia
c20h1orf35	2.11276e-30	0.771247	0.353	0.102	4.41925e-26	Early_oogonia
LOC103377634	2.63693e-30	9.10421	0.799	0.461	5.51567e-26	Early_oogonia
stk40	2.86966e-30	1.52834	0.373	0.117	6.00248e-26	Early_oogonia
LOC103380040	4.6518e-30	1.25235	0.5	0.195	9.73017e-26	Early_oogonia
hdgfl2	6.11911e-30	0.358415	0.373	0.111	1.27993e-25	Early_oogonia
LOC103392434	1.42244e-29	1.08977	0.706	0.363	2.97531e-25	Early_oogonia
LOC103390222	1.4831e-29	1.06298	0.485	0.186	3.10219e-25	Early_oogonia
LOC103385392	1.77625e-29	0.50146	0.265	0.064	3.71539e-25	Early_oogonia
LOC112486262	2.16496e-29	5.87463	0.951	0.796	4.52844e-25	Early_oogonia
LOC103389570	4.35223e-29	1.52291	0.564	0.24	9.10357e-25	Early_oogonia
nolc1	4.53439e-29	1.49462	0.613	0.276	9.48458e-25	Early_oogonia
hirip3	1.48694e-28	2.64769	0.314	0.088	3.11023e-24	Early_oogonia
LOC103385776	1.54868e-28	0.663547	0.461	0.174	3.23937e-24	Early_oogonia
LOC103394577	2.76786e-28	0.626695	0.431	0.152	5.78954e-24	Early_oogonia
LOC103384347	4.99681e-28	1.33106	0.525	0.219	1.04518e-23	Early_oogonia
LOC103391028	6.54853e-28	0.358874	0.412	0.143	1.36976e-23	Early_oogonia
LOC103393418	1.57399e-27	0.618508	0.265	0.068	3.29231e-23	Early_oogonia
limd2	5.18016e-27	0.387358	0.299	0.084	1.08353e-22	Early_oogonia
mtch2	1.18216e-26	3.93787	0.505	0.213	2.47272e-22	Early_oogonia
kpna3	1.31983e-26	1.95508	0.412	0.148	2.7607e-22	Early_oogonia
fcf1	1.63669e-26	0.593673	0.539	0.244	3.42346e-22	Early_oogonia
etv5	1.90215e-26	1.47324	0.451	0.171	3.97873e-22	Early_oogonia
LOC103396440	2.66354e-26	1.49712	0.525	0.23	5.57133e-22	Early_oogonia
LOC103395151	2.68707e-26	0.57552	0.779	0.48	5.62055e-22	Early_oogonia
actr6	3.41956e-26	2.00621	0.613	0.296	7.1527e-22	Early_oogonia
surf6	3.47689e-26	1.35686	0.333	0.104	7.2726e-22	Early_oogonia
LOC103384869	4.79937e-26	1.76047	0.578	0.262	1.00388e-21	Early_oogonia
LOC103390817	5.63538e-26	0.336677	0.485	0.189	1.17875e-21	Early_oogonia
zglp1	6.40593e-26	2.57613	0.333	0.104	1.33993e-21	Early_oogonia
snrpa	6.77604e-26	1.62526	0.618	0.297	1.41734e-21	Early_oogonia
rad9b	9.33951e-26	0.567001	0.284	0.08	1.95355e-21	Early_oogonia
LOC103389486	1.36119e-25	1.20585	0.529	0.228	2.84721e-21	Early_oogonia
dbr1	1.59251e-25	1.53323	0.358	0.118	3.33106e-21	Early_oogonia
sox4	1.8399e-25	0.837462	0.373	0.127	3.84852e-21	Early_oogonia
cwf19l2	3.53822e-25	0.88429	0.265	0.072	7.40089e-21	Early_oogonia
cnpy3	3.81547e-25	0.413874	0.363	0.122	7.98082e-21	Early_oogonia
bcl2l14	4.26135e-25	1.53481	0.495	0.208	8.91347e-21	Early_oogonia
sf3b6	6.43399e-25	2.7929	0.593	0.294	1.3458e-20	Early_oogonia
LOC103385975	8.26024e-25	0.281235	0.51	0.215	1.72779e-20	Early_oogonia
LOC112487654	9.75431e-25	1.0006	0.417	0.157	2.04031e-20	Early_oogonia
rpusd2	9.92081e-25	0.279413	0.456	0.18	2.07514e-20	Early_oogonia
LOC103391190	1.23703e-24	1.79567	0.402	0.152	2.58749e-20	Early_oogonia
klc2	1.38635e-24	0.607592	0.284	0.082	2.89983e-20	Early_oogonia
LOC103382079	1.44882e-24	0.752671	0.353	0.116	3.0305e-20	Early_oogonia
gnl3	2.29775e-24	1.86013	0.485	0.2	4.8062e-20	Early_oogonia
nop53	3.13559e-24	2.12023	0.686	0.397	6.55872e-20	Early_oogonia
pin4	3.34372e-24	1.37656	0.525	0.23	6.99406e-20	Early_oogonia
LOC103378294	4.19247e-24	1.86237	0.691	0.398	8.76938e-20	Early_oogonia
LOC103393414	4.45868e-24	1.83847	0.485	0.2	9.32621e-20	Early_oogonia
LOC103389409	4.87247e-24	2.14114	0.608	0.314	1.01918e-19	Early_oogonia
LOC103383254	5.53471e-24	1.50504	0.613	0.307	1.15769e-19	Early_oogonia
c18h6orf136	8.16456e-24	0.749721	0.324	0.106	1.70778e-19	Early_oogonia
LOC103394109	1.1058e-23	1.08017	0.407	0.152	2.313e-19	Early_oogonia
LOC103382849	1.1255e-23	1.65171	0.5	0.227	2.3542e-19	Early_oogonia
ccdc71	1.19212e-23	0.515236	0.338	0.112	2.49356e-19	Early_oogonia
mak16	1.71725e-23	0.587718	0.52	0.231	3.59197e-19	Early_oogonia
LOC103397906	1.93432e-23	1.04968	0.402	0.152	4.04601e-19	Early_oogonia
fmr1	1.97582e-23	0.704629	0.333	0.11	4.13283e-19	Early_oogonia
tut1	2.07369e-23	0.979075	0.426	0.167	4.33753e-19	Early_oogonia
cd3eap	2.11965e-23	1.88306	0.417	0.165	4.43367e-19	Early_oogonia
kif22	2.26334e-23	1.34946	0.382	0.141	4.73422e-19	Early_oogonia
LOC103389294	3.5599e-23	0.749202	0.348	0.121	7.44625e-19	Early_oogonia
nucks1	7.40079e-23	0.469515	0.525	0.237	1.54802e-18	Early_oogonia
rangrf	7.8751e-23	0.531267	0.412	0.159	1.64724e-18	Early_oogonia
cpsf2	9.19556e-23	0.395812	0.289	0.088	1.92344e-18	Early_oogonia
srsf10	1.01392e-22	0.559636	0.255	0.072	2.12082e-18	Early_oogonia
lman1	1.12406e-22	0.803079	0.324	0.107	2.3512e-18	Early_oogonia
slc31a1	1.18112e-22	1.7243	0.382	0.142	2.47056e-18	Early_oogonia
LOC103380397	1.27501e-22	0.607991	0.49	0.211	2.66694e-18	Early_oogonia
cdc6	1.5681e-22	0.664133	0.27	0.079	3.27999e-18	Early_oogonia
pdia3	1.67255e-22	2.75299	0.676	0.406	3.49848e-18	Early_oogonia
morc2	2.03554e-22	0.73989	0.309	0.1	4.25774e-18	Early_oogonia
dvl2	2.57464e-22	0.825298	0.348	0.121	5.38537e-18	Early_oogonia
LOC103395865	3.35463e-22	0.890915	0.382	0.148	7.01687e-18	Early_oogonia
LOC103388381	3.95602e-22	0.702665	0.299	0.096	8.27481e-18	Early_oogonia
psmb6	4.49749e-22	5.4923	0.819	0.55	9.4074e-18	Early_oogonia
LOC103386924	5.19094e-22	0.602515	0.779	0.483	1.08579e-17	Early_oogonia
arf1	5.53318e-22	0.704961	0.294	0.094	1.15737e-17	Early_oogonia
LOC103384280	5.70653e-22	0.93213	0.627	0.321	1.19363e-17	Early_oogonia
c6hxorf56	7.01319e-22	0.810972	0.466	0.202	1.46695e-17	Early_oogonia
fam133b	7.38424e-22	2.61776	0.441	0.19	1.54456e-17	Early_oogonia
rae1	9.17392e-22	0.573931	0.49	0.214	1.91891e-17	Early_oogonia
LOC103392920	1.03688e-21	0.722078	0.451	0.192	2.16885e-17	Early_oogonia
LOC103389376	1.14321e-21	0.904915	0.598	0.318	2.39125e-17	Early_oogonia
naa50	1.9628e-21	1.01109	0.495	0.227	4.10558e-17	Early_oogonia
LOC103394526	2.24011e-21	1.07901	0.696	0.387	4.68563e-17	Early_oogonia
LOC103383087	2.64571e-21	1.04536	0.461	0.205	5.53404e-17	Early_oogonia
LOC103389721	3.17942e-21	1.13904	0.456	0.204	6.65039e-17	Early_oogonia
LOC103383833	4.29133e-21	0.840604	0.353	0.129	8.97618e-17	Early_oogonia
kif20b	4.52515e-21	0.774953	0.255	0.075	9.46525e-17	Early_oogonia
reep2	5.11134e-21	1.25913	0.461	0.197	1.06914e-16	Early_oogonia
tbl2	7.51816e-21	1.78818	0.358	0.133	1.57257e-16	Early_oogonia
tfdp1	1.06671e-20	0.992329	0.711	0.421	2.23123e-16	Early_oogonia
kras	1.46742e-20	1.586	0.431	0.181	3.0694e-16	Early_oogonia
LOC103393706	1.78186e-20	2.445	0.804	0.546	3.72711e-16	Early_oogonia
LOC103389253	1.95671e-20	0.725356	0.422	0.178	4.09286e-16	Early_oogonia
exosc9	2.0113e-20	1.11698	0.27	0.084	4.20704e-16	Early_oogonia
LOC103379405	2.05082e-20	0.821286	0.475	0.216	4.2897e-16	Early_oogonia
LOC103392573	2.34519e-20	0.703909	0.333	0.12	4.90543e-16	Early_oogonia
cyfip2	2.57621e-20	0.750795	0.324	0.116	5.38865e-16	Early_oogonia
abt1	3.98024e-20	0.49129	0.353	0.131	8.32546e-16	Early_oogonia
upf3b	5.499e-20	0.364099	0.304	0.104	1.15023e-15	Early_oogonia
srpk1	5.99714e-20	1.14161	0.461	0.208	1.25442e-15	Early_oogonia
rad23b	6.25242e-20	1.72377	0.422	0.178	1.30782e-15	Early_oogonia
rcor3	8.41854e-20	0.603643	0.319	0.114	1.76091e-15	Early_oogonia
tram2	8.85881e-20	1.21265	0.309	0.11	1.853e-15	Early_oogonia
acsl5	9.85004e-20	0.473752	0.74	0.452	2.06033e-15	Early_oogonia
LOC103397434	1.12901e-19	0.739398	0.716	0.444	2.36154e-15	Early_oogonia
mis12	1.19307e-19	0.499969	0.324	0.116	2.49555e-15	Early_oogonia
memo1	1.4601e-19	1.15287	0.309	0.108	3.05408e-15	Early_oogonia
lyar	1.55411e-19	0.58735	0.426	0.184	3.25074e-15	Early_oogonia
LOC103396811	1.99199e-19	0.636862	0.48	0.223	4.16664e-15	Early_oogonia
fignl1	2.23321e-19	0.369518	0.382	0.152	4.67121e-15	Early_oogonia
LOC107988844	2.28139e-19	1.63249	0.338	0.127	4.77198e-15	Early_oogonia
LOC103398525	3.2174e-19	0.65384	0.475	0.228	6.72983e-15	Early_oogonia
nudc	3.2328e-19	0.595242	0.637	0.354	6.76205e-15	Early_oogonia
LOC103377409	3.61677e-19	1.31868	0.608	0.337	7.5652e-15	Early_oogonia
rcc1	4.45957e-19	0.308472	0.583	0.304	9.32808e-15	Early_oogonia
zc3h15	4.8142e-19	0.787463	0.48	0.227	1.00699e-14	Early_oogonia
rsl1d1	6.48073e-19	1.31578	0.667	0.395	1.35558e-14	Early_oogonia
fam199x	6.48099e-19	0.461286	0.373	0.15	1.35563e-14	Early_oogonia
LOC103382086	6.79631e-19	1.36879	0.353	0.139	1.42158e-14	Early_oogonia
ssr1	7.16959e-19	1.11172	0.51	0.253	1.49966e-14	Early_oogonia
znf451	7.90253e-19	0.555711	0.324	0.121	1.65297e-14	Early_oogonia
LOC103397164	8.66768e-19	1.03412	0.294	0.103	1.81302e-14	Early_oogonia
cmss1	8.79279e-19	0.673367	0.328	0.124	1.83919e-14	Early_oogonia
mau2	9.00115e-19	1.76362	0.48	0.232	1.88277e-14	Early_oogonia
dnajc21	9.23879e-19	1.8372	0.279	0.097	1.93248e-14	Early_oogonia
psmd7	9.73774e-19	0.300459	0.525	0.26	2.03684e-14	Early_oogonia
uhrf1	1.25304e-18	0.630672	0.382	0.159	2.62098e-14	Early_oogonia
LOC103385853	1.31874e-18	1.3848	0.539	0.28	2.75842e-14	Early_oogonia
eaf2	1.35651e-18	1.00594	0.319	0.12	2.83741e-14	Early_oogonia
ppig	1.37162e-18	0.869297	0.485	0.236	2.86901e-14	Early_oogonia
LOC103383826	1.43448e-18	0.841696	0.431	0.193	3.0005e-14	Early_oogonia
pinx1	1.4831e-18	1.25149	0.436	0.198	3.1022e-14	Early_oogonia
fscn1	1.57298e-18	0.905287	0.49	0.235	3.2902e-14	Early_oogonia
LOC103391469	1.88664e-18	0.409254	0.309	0.11	3.94629e-14	Early_oogonia
dazl	1.89313e-18	1.12735	0.299	0.108	3.95985e-14	Early_oogonia
LOC112488027	2.11238e-18	0.386885	0.294	0.102	4.41847e-14	Early_oogonia
hnrnpl	2.12815e-18	0.464192	0.343	0.131	4.45146e-14	Early_oogonia
khsrp	2.41078e-18	1.03617	0.338	0.134	5.04262e-14	Early_oogonia
glo1	2.98761e-18	0.607826	0.387	0.163	6.24918e-14	Early_oogonia
parn	3.1442e-18	1.25535	0.608	0.339	6.57672e-14	Early_oogonia
LOC112487874	3.39761e-18	0.792442	0.26	0.086	7.10678e-14	Early_oogonia
ddx55	5.01301e-18	0.361724	0.299	0.106	1.04857e-13	Early_oogonia
nelfcd	6.32e-18	0.858506	0.27	0.092	1.32195e-13	Early_oogonia
LOC103380140	9.89248e-18	0.579734	0.284	0.102	2.06921e-13	Early_oogonia
wbp11	1.27283e-17	0.448972	0.363	0.146	2.66238e-13	Early_oogonia
LOC103398348	1.32307e-17	0.638569	0.549	0.301	2.76746e-13	Early_oogonia
sarnp	1.66904e-17	0.689701	0.431	0.197	3.49112e-13	Early_oogonia
nkiras1	1.90339e-17	0.344321	0.284	0.1	3.98132e-13	Early_oogonia
rbm22	2.0843e-17	0.479447	0.559	0.306	4.35974e-13	Early_oogonia
LOC103386434	3.33516e-17	0.40996	0.299	0.11	6.97615e-13	Early_oogonia
ganab	3.78877e-17	2.99556	0.451	0.211	7.92496e-13	Early_oogonia
LOC103379274	4.03847e-17	1.95602	0.319	0.125	8.44728e-13	Early_oogonia
fam89a	4.7755e-17	0.745681	0.309	0.116	9.98891e-13	Early_oogonia
cnot8	4.94717e-17	1.51809	0.426	0.206	1.0348e-12	Early_oogonia
sall4	5.68286e-17	0.323599	0.495	0.251	1.18868e-12	Early_oogonia
LOC103386685	6.15478e-17	0.683258	0.343	0.141	1.28739e-12	Early_oogonia
psmc1	7.23868e-17	0.738342	0.466	0.226	1.51411e-12	Early_oogonia
LOC103380154	9.57315e-17	0.598285	0.304	0.116	2.00242e-12	Early_oogonia
bms1	1.35278e-16	1.81924	0.412	0.191	2.82961e-12	Early_oogonia
LOC103389685	1.37205e-16	0.502589	0.309	0.12	2.86993e-12	Early_oogonia
paip2b	1.77297e-16	2.41582	0.569	0.328	3.70853e-12	Early_oogonia
ntmt1	1.86998e-16	0.468518	0.27	0.095	3.91143e-12	Early_oogonia
LOC103391826	1.92387e-16	1.61705	0.373	0.162	4.02416e-12	Early_oogonia
LOC103378134	2.07307e-16	1.45515	0.436	0.207	4.33623e-12	Early_oogonia
LOC103393004	4.48542e-16	0.41068	0.275	0.1	9.38214e-12	Early_oogonia
LOC103390748	4.61527e-16	0.429325	0.377	0.166	9.65376e-12	Early_oogonia
gle1	6.12785e-16	0.342179	0.294	0.11	1.28176e-11	Early_oogonia
LOC103390985	7.69225e-16	2.23413	0.343	0.149	1.60899e-11	Early_oogonia
LOC103390060	8.41156e-16	0.378275	0.309	0.124	1.75945e-11	Early_oogonia
LOC103391097	9.9326e-16	0.360129	0.304	0.118	2.0776e-11	Early_oogonia
hells	1.10612e-15	0.649851	0.5	0.252	2.31366e-11	Early_oogonia
ywhae	1.17077e-15	1.28094	0.48	0.256	2.44891e-11	Early_oogonia
baz1a	1.24608e-15	0.865992	0.343	0.146	2.60642e-11	Early_oogonia
tomm70	1.75385e-15	1.64952	0.387	0.179	3.66853e-11	Early_oogonia
plrg1	2.14165e-15	0.31725	0.51	0.272	4.47968e-11	Early_oogonia
necap2	2.20978e-15	0.339047	0.27	0.099	4.6222e-11	Early_oogonia
LOC103388317	2.34976e-15	0.7471	0.343	0.146	4.915e-11	Early_oogonia
bcl2l13	2.41844e-15	0.633997	0.289	0.111	5.05865e-11	Early_oogonia
LOC103393922	2.49864e-15	0.475926	0.343	0.146	5.22641e-11	Early_oogonia
mrpl11	2.72725e-15	0.275164	0.319	0.129	5.7046e-11	Early_oogonia
trib2	2.84393e-15	0.338444	0.382	0.173	5.94865e-11	Early_oogonia
LOC103381026	2.94818e-15	0.408202	0.319	0.131	6.1667e-11	Early_oogonia
ccdc9	2.95408e-15	0.394258	0.275	0.103	6.17905e-11	Early_oogonia
LOC103383506	3.28763e-15	0.638912	0.466	0.234	6.87673e-11	Early_oogonia
LOC103396585	3.31771e-15	0.865754	0.353	0.155	6.93966e-11	Early_oogonia
brf1	3.44711e-15	0.408024	0.294	0.115	7.21032e-11	Early_oogonia
LOC103391328	3.60499e-15	0.261167	0.49	0.259	7.54056e-11	Early_oogonia
pptc7	3.77712e-15	0.409758	0.26	0.095	7.9006e-11	Early_oogonia
asz1	3.88413e-15	0.674788	0.279	0.108	8.12444e-11	Early_oogonia
prpf19	4.00332e-15	0.957985	0.485	0.258	8.37375e-11	Early_oogonia
haus4	4.79919e-15	1.0159	0.299	0.117	1.00385e-10	Early_oogonia
LOC103390973	5.60386e-15	0.525413	0.265	0.1	1.17216e-10	Early_oogonia
LOC103390448	6.13911e-15	0.250699	0.382	0.175	1.28412e-10	Early_oogonia
noc3l	6.38922e-15	0.673439	0.466	0.24	1.33643e-10	Early_oogonia
LOC103379834	6.49529e-15	0.382122	0.348	0.148	1.35862e-10	Early_oogonia
snx5	8.65205e-15	0.499096	0.27	0.102	1.80975e-10	Early_oogonia
LOC103389958	9.54132e-15	0.663346	0.363	0.162	1.99576e-10	Early_oogonia
ctnnb1	1.042e-14	2.21641	0.392	0.185	2.17955e-10	Early_oogonia
lman2	1.42548e-14	0.517356	0.348	0.155	2.98167e-10	Early_oogonia
mrm3	1.47459e-14	0.4551	0.417	0.203	3.08439e-10	Early_oogonia
nol7	1.48757e-14	0.64423	0.338	0.15	3.11155e-10	Early_oogonia
srsf5	1.50909e-14	0.551071	0.485	0.26	3.15656e-10	Early_oogonia
arglu1	1.57555e-14	0.645116	0.466	0.234	3.29558e-10	Early_oogonia
hexb	1.84757e-14	0.415174	0.412	0.199	3.86456e-10	Early_oogonia
xrcc1	1.96106e-14	0.32873	0.294	0.118	4.10196e-10	Early_oogonia
LOC103385405	1.97962e-14	0.460319	0.275	0.106	4.14077e-10	Early_oogonia
kpna4	2.04076e-14	1.3498	0.373	0.174	4.26866e-10	Early_oogonia
eif4g2	2.34476e-14	0.854837	0.534	0.296	4.90454e-10	Early_oogonia
LOC103382982	2.52676e-14	1.32807	0.525	0.301	5.28523e-10	Early_oogonia
max	3.7952e-14	3.16909	0.588	0.37	7.93841e-10	Early_oogonia
LOC103383557	4.00006e-14	0.791529	0.529	0.304	8.36693e-10	Early_oogonia
rab8a	4.32164e-14	0.746123	0.338	0.148	9.03957e-10	Early_oogonia
LOC103387320	5.90802e-14	0.541181	0.407	0.194	1.23578e-09	Early_oogonia
ctsc	5.92889e-14	0.774124	0.363	0.169	1.24015e-09	Early_oogonia
tmem97	5.93263e-14	0.330956	0.353	0.159	1.24093e-09	Early_oogonia
cenpk	6.18708e-14	0.547639	0.348	0.156	1.29415e-09	Early_oogonia
lsm3	7.11237e-14	6.02944	0.593	0.374	1.4877e-09	Early_oogonia
srrm1	7.27225e-14	1.56215	0.446	0.236	1.52114e-09	Early_oogonia
LOC103391153	7.30924e-14	0.603963	0.309	0.132	1.52887e-09	Early_oogonia
LOC103385107	7.511e-14	0.352225	0.27	0.105	1.57108e-09	Early_oogonia
mybbp1a	7.6807e-14	0.512	0.328	0.143	1.60657e-09	Early_oogonia
anln	1.0038e-13	0.929475	0.26	0.102	2.09965e-09	Early_oogonia
cdkn1b	1.30203e-13	1.21632	0.436	0.225	2.72345e-09	Early_oogonia
pigh	1.37879e-13	0.685689	0.279	0.114	2.88401e-09	Early_oogonia
LOC103397429	1.41496e-13	0.284282	0.319	0.136	2.95967e-09	Early_oogonia
tax1bp3	1.68212e-13	0.576143	0.27	0.109	3.51849e-09	Early_oogonia
blmh	2.23312e-13	0.842004	0.5	0.274	4.67102e-09	Early_oogonia
LOC103379762	2.42356e-13	0.799653	0.284	0.117	5.06936e-09	Early_oogonia
cwc25	2.48867e-13	0.814913	0.51	0.293	5.20556e-09	Early_oogonia
wdr74	2.51038e-13	0.917952	0.397	0.201	5.25095e-09	Early_oogonia
sssca1	2.7e-13	1.22697	0.48	0.262	5.64758e-09	Early_oogonia
LOC103380551	2.92573e-13	1.00334	0.363	0.173	6.11975e-09	Early_oogonia
LOC103391196	3.24488e-13	0.32311	0.333	0.147	6.78733e-09	Early_oogonia
LOC103395841	3.33082e-13	0.403558	0.466	0.249	6.96707e-09	Early_oogonia
trmt5	4.35557e-13	0.445045	0.363	0.169	9.11054e-09	Early_oogonia
LOC103394257	4.4581e-13	3.0211	0.701	0.466	9.32501e-09	Early_oogonia
LOC103387369	4.99417e-13	0.565557	0.525	0.293	1.04463e-08	Early_oogonia
LOC103388601	5.58217e-13	1.01381	0.353	0.167	1.16762e-08	Early_oogonia
LOC103386383	5.89533e-13	0.765201	0.461	0.251	1.23313e-08	Early_oogonia
mmgt1	5.97219e-13	0.671172	0.446	0.239	1.2492e-08	Early_oogonia
lrrc1	7.03963e-13	0.276307	0.324	0.143	1.47248e-08	Early_oogonia
LOC103385145	1.27688e-12	1.49429	0.422	0.223	2.67084e-08	Early_oogonia
LOC103390629	1.60799e-12	2.97602	0.632	0.407	3.36344e-08	Early_oogonia
arpc1a	1.68472e-12	0.311616	0.309	0.136	3.52392e-08	Early_oogonia
LOC103393926	1.9879e-12	1.35605	0.485	0.283	4.15808e-08	Early_oogonia
LOC103379916	2.08468e-12	0.57161	0.343	0.165	4.36053e-08	Early_oogonia
mta1	2.08517e-12	0.714445	0.275	0.117	4.36155e-08	Early_oogonia
LOC103397209	2.1894e-12	0.702144	0.265	0.11	4.57957e-08	Early_oogonia
LOC103398200	2.24607e-12	1.27592	0.382	0.197	4.6981e-08	Early_oogonia
cacfd1	2.37641e-12	0.521267	0.382	0.189	4.97074e-08	Early_oogonia
ccdc86	2.42115e-12	1.41873	0.446	0.247	5.06431e-08	Early_oogonia
yju2	2.64365e-12	2.35421	0.319	0.145	5.52972e-08	Early_oogonia
LOC103395150	2.76023e-12	1.66075	0.74	0.495	5.77357e-08	Early_oogonia
wdr77	3.75576e-12	0.472719	0.544	0.312	7.85593e-08	Early_oogonia
psmc4	3.85053e-12	0.495623	0.593	0.368	8.05415e-08	Early_oogonia
LOC103384722	4.0755e-12	0.287216	0.26	0.105	8.52472e-08	Early_oogonia
drap1	4.83279e-12	0.472467	0.26	0.108	1.01088e-07	Early_oogonia
nusap1	4.91822e-12	1.47819	0.299	0.133	1.02874e-07	Early_oogonia
dctn4	5.62609e-12	0.617175	0.27	0.113	1.17681e-07	Early_oogonia
ing4	6.48961e-12	0.593953	0.343	0.162	1.35743e-07	Early_oogonia
LOC103377787	7.40981e-12	0.316342	0.373	0.184	1.54991e-07	Early_oogonia
usf2	8.2346e-12	0.43061	0.348	0.172	1.72243e-07	Early_oogonia
rbm28	8.28127e-12	1.18902	0.314	0.141	1.73219e-07	Early_oogonia
LOC103396474	8.77374e-12	0.755366	0.289	0.131	1.8352e-07	Early_oogonia
stoml2	9.20184e-12	0.814505	0.289	0.129	1.92475e-07	Early_oogonia
LOC103393708	1.07333e-11	1.37931	0.755	0.571	2.24509e-07	Early_oogonia
LOC103378277	1.13479e-11	0.323394	0.314	0.144	2.37363e-07	Early_oogonia
sybu	1.38452e-11	0.587246	0.417	0.224	2.89599e-07	Early_oogonia
oard1	1.96065e-11	0.38623	0.382	0.196	4.10109e-07	Early_oogonia
fbl	2.42471e-11	1.43218	0.534	0.316	5.07176e-07	Early_oogonia
luc7l3	3.31543e-11	0.271863	0.284	0.126	6.93489e-07	Early_oogonia
LOC103390988	3.51399e-11	0.361366	0.387	0.202	7.3502e-07	Early_oogonia
trmt6	4.34976e-11	0.35381	0.26	0.112	9.09839e-07	Early_oogonia
cbx5	4.38615e-11	1.26615	0.451	0.245	9.1745e-07	Early_oogonia
LOC103383373	4.57236e-11	2.03978	0.431	0.238	9.564e-07	Early_oogonia
LOC103393948	4.59886e-11	1.25785	0.515	0.326	9.61944e-07	Early_oogonia
LOC103397940	4.66784e-11	0.507647	0.382	0.199	9.76373e-07	Early_oogonia
hspa5	4.79756e-11	0.764314	0.377	0.198	1.00351e-06	Early_oogonia
naa15	5.11785e-11	0.99536	0.373	0.195	1.0705e-06	Early_oogonia
psme3	5.29155e-11	0.620505	0.593	0.376	1.10683e-06	Early_oogonia
caprin1	5.58548e-11	0.700739	0.446	0.254	1.16832e-06	Early_oogonia
ilk	6.09239e-11	0.400988	0.377	0.196	1.27435e-06	Early_oogonia
cpvl	6.1591e-11	0.42474	0.309	0.149	1.2883e-06	Early_oogonia
dis3l2	7.29209e-11	0.636262	0.343	0.17	1.52529e-06	Early_oogonia
coil	1.05791e-10	0.369036	0.299	0.139	2.21284e-06	Early_oogonia
LOC103391451	1.16646e-10	1.21082	0.446	0.263	2.43988e-06	Early_oogonia
LOC103379410	1.24563e-10	0.285522	0.265	0.116	2.60548e-06	Early_oogonia
ptp4a1	1.52383e-10	0.501948	0.309	0.153	3.1874e-06	Early_oogonia
uchl3	1.52609e-10	0.812969	0.358	0.182	3.19211e-06	Early_oogonia
cwf19l1	1.57387e-10	0.638256	0.377	0.199	3.29206e-06	Early_oogonia
LOC103393784	1.80713e-10	0.335882	0.363	0.197	3.77997e-06	Early_oogonia
LOC103378505	1.96038e-10	0.603839	0.328	0.165	4.10054e-06	Early_oogonia
LOC103376744	2.05401e-10	0.684367	0.412	0.227	4.29636e-06	Early_oogonia
LOC103377855	2.15743e-10	0.461452	0.368	0.192	4.51269e-06	Early_oogonia
lsm14a	2.23576e-10	0.61604	0.324	0.163	4.67654e-06	Early_oogonia
LOC103381230	3.18168e-10	1.71315	0.593	0.386	6.65513e-06	Early_oogonia
nin	3.35873e-10	0.320509	0.294	0.138	7.02546e-06	Early_oogonia
srsf3	3.59647e-10	0.68231	0.603	0.418	7.52273e-06	Early_oogonia
psmd3	3.6123e-10	0.721173	0.343	0.179	7.55584e-06	Early_oogonia
LOC103386216	3.67331e-10	0.293474	0.255	0.112	7.68346e-06	Early_oogonia
LOC103378738	4.21225e-10	0.374235	0.319	0.161	8.81077e-06	Early_oogonia
LOC103382148	4.80039e-10	0.628919	0.27	0.124	1.0041e-05	Early_oogonia
hnrnpu	5.50729e-10	0.517412	0.299	0.146	1.15196e-05	Early_oogonia
rbm27	5.82589e-10	0.257343	0.284	0.135	1.2186e-05	Early_oogonia
c1d	6.47824e-10	0.605478	0.569	0.385	1.35505e-05	Early_oogonia
sh3bgrl3	6.88144e-10	0.472965	0.328	0.168	1.43939e-05	Early_oogonia
LOC103396307	9.78614e-10	0.348068	0.338	0.173	2.04697e-05	Early_oogonia
gnl3l	9.94876e-10	0.694829	0.26	0.121	2.08098e-05	Early_oogonia
hdgf	1.03031e-09	0.325332	0.348	0.183	2.1551e-05	Early_oogonia
snrnp48	1.05394e-09	0.481739	0.289	0.144	2.20453e-05	Early_oogonia
LOC103381893	1.07977e-09	0.558053	0.289	0.141	2.25856e-05	Early_oogonia
LOC103382264	1.11604e-09	0.834708	0.275	0.135	2.33442e-05	Early_oogonia
zmat2	1.4452e-09	1.45659	0.387	0.218	3.02293e-05	Early_oogonia
abcf2	1.47926e-09	2.97976	0.505	0.315	3.09417e-05	Early_oogonia
dnajc25	1.81436e-09	0.697357	0.49	0.303	3.79509e-05	Early_oogonia
rtf1	1.88242e-09	0.564869	0.319	0.164	3.93746e-05	Early_oogonia
LOC103386889	1.89632e-09	0.564317	0.279	0.136	3.96652e-05	Early_oogonia
anapc15	1.89884e-09	0.293557	0.26	0.118	3.9718e-05	Early_oogonia
usp14	3.43212e-09	0.446694	0.373	0.204	7.17896e-05	Early_oogonia
abi2	3.59415e-09	1.42482	0.412	0.249	7.51788e-05	Early_oogonia
LOC103379320	4.26153e-09	1.38425	0.358	0.198	8.91384e-05	Early_oogonia
LOC103389400	4.72978e-09	0.548948	0.26	0.124	9.89328e-05	Early_oogonia
psmd2	5.43322e-09	0.476679	0.358	0.195	0.000113647	Early_oogonia
cd46	5.93605e-09	0.386782	0.436	0.264	0.000124164	Early_oogonia
LOC103383261	6.11892e-09	0.292254	0.284	0.14	0.000127989	Early_oogonia
LOC112488424	6.45776e-09	1.02579	0.338	0.19	0.000135077	Early_oogonia
srp68	6.48972e-09	0.52183	0.348	0.191	0.000135746	Early_oogonia
fam76b	6.5261e-09	0.438037	0.348	0.19	0.000136507	Early_oogonia
LOC103381763	6.91115e-09	0.466085	0.289	0.145	0.00014456	Early_oogonia
rpp30	7.49441e-09	1.50522	0.309	0.158	0.000156761	Early_oogonia
rnf168	7.57029e-09	0.262234	0.333	0.175	0.000158348	Early_oogonia
LOC103394984	8.48523e-09	0.911688	0.324	0.17	0.000177486	Early_oogonia
arih2	8.72497e-09	0.394126	0.299	0.157	0.0001825	Early_oogonia
med4	9.48397e-09	0.30864	0.319	0.165	0.000198376	Early_oogonia
LOC103383484	1.25508e-08	0.399811	0.373	0.21	0.000262526	Early_oogonia
atp6v1g1	1.49465e-08	1.83132	0.48	0.308	0.000312637	Early_oogonia
prrc2c	1.56066e-08	0.308345	0.26	0.126	0.000326442	Early_oogonia
bub3	1.56201e-08	1.49366	0.426	0.262	0.000326726	Early_oogonia
c8h12orf45	1.84428e-08	0.594375	0.294	0.152	0.000385767	Early_oogonia
msh6	2.87793e-08	1.91723	0.382	0.226	0.000601976	Early_oogonia
tbl3	3.15084e-08	1.60239	0.451	0.281	0.000659061	Early_oogonia
triap1	3.1879e-08	0.644924	0.289	0.148	0.000666813	Early_oogonia
akirin1	3.52872e-08	0.294126	0.324	0.175	0.000738102	Early_oogonia
psmd12	3.91143e-08	0.493497	0.324	0.175	0.000818153	Early_oogonia
poldip3	5.49043e-08	0.683561	0.343	0.192	0.00114843	Early_oogonia
LOC103386332	5.92398e-08	0.386481	0.314	0.17	0.00123912	Early_oogonia
ddx23	6.13558e-08	0.306208	0.338	0.193	0.00128338	Early_oogonia
txnl1	7.63857e-08	0.313398	0.255	0.127	0.00159776	Early_oogonia
arfgap2	8.42862e-08	0.588617	0.294	0.161	0.00176301	Early_oogonia
LOC103380033	8.43518e-08	0.650137	0.255	0.128	0.00176439	Early_oogonia
etf1	8.47252e-08	1.54537	0.348	0.198	0.0017722	Early_oogonia
hspa9	9.56578e-08	2.43335	0.505	0.333	0.00200087	Early_oogonia
tsr3	9.7424e-08	0.617311	0.373	0.224	0.00203782	Early_oogonia
pcmt1	9.85346e-08	0.497449	0.284	0.151	0.00206105	Early_oogonia
chmp2a	1.01397e-07	0.320831	0.299	0.158	0.00212092	Early_oogonia
hnrnpm	1.03723e-07	0.272421	0.441	0.276	0.00216957	Early_oogonia
jpt2	1.16475e-07	0.319338	0.338	0.192	0.00243631	Early_oogonia
tmem53	1.32112e-07	0.369127	0.407	0.251	0.00276338	Early_oogonia
mrpl24	1.48939e-07	0.713218	0.324	0.183	0.00311535	Early_oogonia
LOC103388342	1.53785e-07	0.271433	0.309	0.171	0.00321673	Early_oogonia
LOC103385642	1.76622e-07	0.300462	0.338	0.193	0.00369439	Early_oogonia
LOC103390759	1.8306e-07	0.260872	0.338	0.195	0.00382907	Early_oogonia
srsf7	1.919e-07	2.07787	0.377	0.228	0.00401398	Early_oogonia
odc1	2.21225e-07	0.312325	0.358	0.209	0.00462737	Early_oogonia
rcan1	2.55303e-07	0.508586	0.338	0.197	0.00534017	Early_oogonia
LOC103398702	3.19077e-07	0.640635	0.382	0.233	0.00667413	Early_oogonia
LOC103390003	3.22603e-07	0.433067	0.304	0.168	0.00674789	Early_oogonia
mri1	3.3782e-07	0.373737	0.284	0.155	0.00706617	Early_oogonia
c20h14orf119	3.89203e-07	0.464865	0.426	0.272	0.00814096	Early_oogonia
LOC103389475	3.9399e-07	0.740475	0.368	0.229	0.00824108	Early_oogonia
sec61a1	3.95232e-07	0.361519	0.279	0.151	0.00826706	Early_oogonia
slu7	4.04923e-07	0.423192	0.319	0.186	0.00846977	Early_oogonia
LOC103387325	4.19474e-07	0.376482	0.328	0.186	0.00877414	Early_oogonia
pabpn1	4.24546e-07	0.342584	0.294	0.164	0.00888024	Early_oogonia
frg1	4.44483e-07	2.9358	0.358	0.213	0.00929725	Early_oogonia
cwc15	4.5393e-07	4.32792	0.475	0.311	0.00949485	Early_oogonia
ccdc124	5.83892e-07	0.349111	0.265	0.142	0.0122133	Early_oogonia
rnaseh1	6.30196e-07	1.05016	0.299	0.173	0.0131818	Early_oogonia
poldip2	6.98978e-07	1.47215	0.333	0.197	0.0146205	Early_oogonia
slc7a6os	7.72818e-07	0.313383	0.265	0.143	0.016165	Early_oogonia
nup62	7.77041e-07	0.286119	0.402	0.251	0.0162534	Early_oogonia
phf20	7.98246e-07	0.41451	0.27	0.146	0.0166969	Early_oogonia
sptssa	8.0488e-07	0.783572	0.314	0.178	0.0168357	Early_oogonia
bcap31	9.27895e-07	0.276665	0.284	0.157	0.0194088	Early_oogonia
pex13	1.02621e-06	0.302108	0.348	0.202	0.0214653	Early_oogonia
mcrs1	1.08167e-06	0.523228	0.319	0.184	0.0226252	Early_oogonia
LOC103384877	1.09294e-06	0.438516	0.583	0.415	0.022861	Early_oogonia
clns1a	1.14735e-06	1.63297	0.456	0.3	0.0239991	Early_oogonia
snw1	1.15047e-06	0.298254	0.377	0.235	0.0240644	Early_oogonia
LOC103382684	1.23755e-06	0.442356	0.309	0.179	0.0258858	Early_oogonia
prpf38a	1.43689e-06	0.357813	0.397	0.251	0.0300555	Early_oogonia
gabarap	1.8681e-06	3.64066	0.49	0.33	0.0390751	Early_oogonia
steap3	2.25117e-06	0.471023	0.27	0.148	0.0470878	Early_oogonia

## Sheet: Mitotic oogonia
Gene	p_val	avg_logFC	pct.1	pct.2	p_val_adj	cluster
LOC112487259	0	125.08	0.964	0.572	0	Mitotic oogonia
LOC103377514	0	60.0702	0.943	0.585	0	Mitotic oogonia
LOC103384648	0	34.0076	0.94	0.678	0	Mitotic oogonia
LOC103382284	0	31.0812	0.99	0.818	0	Mitotic oogonia
LOC103383075	0	29.0752	0.938	0.613	0	Mitotic oogonia
LOC103391742	0	22.0803	0.975	0.765	0	Mitotic oogonia
LOC103390386	0	18.9711	0.995	0.884	0	Mitotic oogonia
LOC103379018	0	14.1922	0.92	0.558	0	Mitotic oogonia
ccna2	0	14.0303	0.918	0.551	0	Mitotic oogonia
ccnb1	0	12.9481	0.981	0.75	0	Mitotic oogonia
gmnn	0	8.03875	0.938	0.609	0	Mitotic oogonia
LOC103393202	0	3.34997	0.924	0.621	0	Mitotic oogonia
LOC103395150	0	2.94825	0.824	0.393	0	Mitotic oogonia
rpain	2.26929e-303	10.5876	0.86	0.49	4.74668e-299	Mitotic oogonia
LOC103393868	5.94303e-303	8.2724	0.917	0.621	1.2431e-298	Mitotic oogonia
LOC103396044	1.35427e-301	14.2901	0.947	0.692	2.83273e-297	Mitotic oogonia
LOC103395009	6.74948e-298	60.0803	0.992	0.865	1.41179e-293	Mitotic oogonia
LOC103382285	1.72654e-290	17.2443	0.82	0.433	3.61141e-286	Mitotic oogonia
rrm2	1.51459e-289	3.33056	0.74	0.317	3.16807e-285	Mitotic oogonia
LOC103392929	5.15451e-282	37.0803	0.998	0.897	1.07817e-277	Mitotic oogonia
LOC103397452	1.24325e-280	8.49857	0.496	0.115	2.6005e-276	Mitotic oogonia
LOC103396043	2.78708e-279	7.06157	0.988	0.805	5.82974e-275	Mitotic oogonia
LOC103386630	2.49072e-277	30.0803	0.985	0.815	5.20984e-273	Mitotic oogonia
LOC103393807	3.01478e-274	27.0797	0.815	0.457	6.30601e-270	Mitotic oogonia
pcna	9.57917e-270	17.053	0.975	0.768	2.00367e-265	Mitotic oogonia
LOC103394674	1.36618e-267	105.378	0.999	0.97	2.85765e-263	Mitotic oogonia
LOC103380971	9.17209e-262	17.785	0.845	0.542	1.91853e-257	Mitotic oogonia
pabpn1l	1.65912e-258	13.3936	0.957	0.767	3.47039e-254	Mitotic oogonia
LOC103387155	5.017e-249	5.90724	0.947	0.709	1.04941e-244	Mitotic oogonia
LOC103376940	3.45575e-239	5.04932	0.863	0.518	7.2284e-235	Mitotic oogonia
LOC103393706	9.96229e-239	1.86154	0.83	0.459	2.08381e-234	Mitotic oogonia
LOC103397674	3.28497e-234	30.9621	0.925	0.706	6.87117e-230	Mitotic oogonia
LOC103385446	7.21908e-234	14.5547	0.942	0.708	1.51001e-229	Mitotic oogonia
LOC103377641	1.01544e-229	7.12775	0.9	0.6	2.124e-225	Mitotic oogonia
eif4enif1	6.00207e-229	3.81498	0.669	0.296	1.25545e-224	Mitotic oogonia
LOC103397210	5.18979e-227	4.44884	0.569	0.201	1.08555e-222	Mitotic oogonia
LOC103394607	1.52611e-225	4.17107	0.668	0.295	3.19217e-221	Mitotic oogonia
LOC103382534	1.25805e-222	4.41728	0.689	0.315	2.63146e-218	Mitotic oogonia
LOC103394278	6.38142e-217	20.0758	0.977	0.779	1.3348e-212	Mitotic oogonia
LOC103377069	1.9354e-216	7.95799	0.786	0.44	4.04827e-212	Mitotic oogonia
LOC103376631	4.74878e-215	60.7537	0.996	0.877	9.93302e-211	Mitotic oogonia
LOC103389481	2.51024e-210	6.38247	0.676	0.331	5.25067e-206	Mitotic oogonia
LOC103390540	2.12887e-209	16.2843	0.964	0.799	4.45296e-205	Mitotic oogonia
LOC103385810	2.03404e-204	4.35076	0.568	0.215	4.25461e-200	Mitotic oogonia
LOC103395822	1.55857e-200	4.97486	0.558	0.214	3.26006e-196	Mitotic oogonia
LOC103385706	5.43998e-198	4.05186	0.672	0.317	1.13788e-193	Mitotic oogonia
LOC103385130	3.44982e-196	6.42324	0.881	0.658	7.21598e-192	Mitotic oogonia
LOC103381564	1.08297e-194	2.28328	0.702	0.372	2.26524e-190	Mitotic oogonia
LOC103390244	4.9741e-194	1.4532	0.594	0.249	1.04043e-189	Mitotic oogonia
LOC103397700	3.58367e-190	6.90333	0.849	0.549	7.49596e-186	Mitotic oogonia
cpeb1	9.64026e-190	3.69301	0.646	0.304	2.01645e-185	Mitotic oogonia
chtop	1.42453e-188	2.77925	0.697	0.361	2.97969e-184	Mitotic oogonia
cdca3	4.72428e-186	1.59918	0.629	0.278	9.88179e-182	Mitotic oogonia
LOC112487247	3.38529e-185	4.95599	0.536	0.207	7.081e-181	Mitotic oogonia
LOC103392434	5.21821e-184	2.25062	0.625	0.287	1.09149e-179	Mitotic oogonia
LOC103396584	7.15518e-183	3.19402	0.644	0.31	1.49665e-178	Mitotic oogonia
plk3	1.20472e-182	3.35209	0.671	0.337	2.51992e-178	Mitotic oogonia
LOC103396640	1.16703e-181	3.92	0.564	0.236	2.44108e-177	Mitotic oogonia
snu13	1.2263e-181	3.18377	0.943	0.74	2.56504e-177	Mitotic oogonia
dnmt1	2.25421e-181	5.15283	0.584	0.257	4.71513e-177	Mitotic oogonia
LOC103384877	5.2039e-177	3.09214	0.663	0.338	1.0885e-172	Mitotic oogonia
LOC103395842	8.97157e-177	7.59875	0.741	0.434	1.87658e-172	Mitotic oogonia
LOC103397579	1.80893e-176	9.00936	0.689	0.349	3.78374e-172	Mitotic oogonia
LOC103395151	7.81561e-176	3.93132	0.724	0.409	1.63479e-171	Mitotic oogonia
LOC103390629	1.42584e-174	1.32963	0.656	0.331	2.98243e-170	Mitotic oogonia
acsl5	2.69775e-173	3.56039	0.71	0.376	5.64289e-169	Mitotic oogonia
LOC103393677	2.6046e-172	4.83733	0.776	0.484	5.44805e-168	Mitotic oogonia
pck2	4.93047e-169	1.96903	0.545	0.228	1.03131e-164	Mitotic oogonia
tfdp1	5.96837e-168	2.47225	0.664	0.349	1.2484e-163	Mitotic oogonia
LOC103389210	2.13149e-167	4.62962	0.526	0.211	4.45844e-163	Mitotic oogonia
sall4	1.22396e-164	2.50025	0.485	0.18	2.56015e-160	Mitotic oogonia
LOC103378748	1.47327e-162	3.01695	0.66	0.347	3.08164e-158	Mitotic oogonia
LOC103393708	2.23895e-162	1.99293	0.796	0.501	4.68322e-158	Mitotic oogonia
top1	3.14544e-157	2.96086	0.582	0.272	6.57932e-153	Mitotic oogonia
LOC103394237	3.52513e-157	0.922223	0.687	0.362	7.37351e-153	Mitotic oogonia
LOC103389233	1.53717e-156	0.36164	0.734	0.429	3.2153e-152	Mitotic oogonia
lig1	2.39334e-156	1.47673	0.482	0.183	5.00614e-152	Mitotic oogonia
LOC103383254	4.68404e-155	2.31025	0.549	0.236	9.79761e-151	Mitotic oogonia
ipo5	6.8693e-155	12.8315	0.691	0.389	1.43685e-150	Mitotic oogonia
wdr53	2.10738e-154	4.1677	0.427	0.143	4.40801e-150	Mitotic oogonia
LOC103384280	6.0611e-153	1.35747	0.565	0.249	1.2678e-148	Mitotic oogonia
LOC103392807	9.94004e-153	4.26815	0.624	0.312	2.07916e-148	Mitotic oogonia
LOC103380292	6.3426e-151	4.68448	0.574	0.274	1.32668e-146	Mitotic oogonia
hmga1	2.44689e-150	4.05607	0.577	0.273	5.11817e-146	Mitotic oogonia
LOC103378409	2.8494e-148	2.89809	0.649	0.336	5.96009e-144	Mitotic oogonia
LOC103380461	1.10637e-147	5.02899	0.665	0.362	2.3142e-143	Mitotic oogonia
LOC103382241	6.70738e-146	2.22213	0.553	0.251	1.40298e-141	Mitotic oogonia
LOC103393685	4.43636e-144	4.79777	0.639	0.345	9.27953e-140	Mitotic oogonia
cntd2	1.91596e-143	3.15466	0.861	0.622	4.0076e-139	Mitotic oogonia
LOC103391015	2.16779e-142	7.17771	0.664	0.378	4.53437e-138	Mitotic oogonia
pkhd1l1	4.96419e-141	6.65425	0.719	0.452	1.03836e-136	Mitotic oogonia
prmt5	2.63495e-140	1.95743	0.569	0.27	5.51154e-136	Mitotic oogonia
LOC103393652	4.84648e-137	2.08423	0.557	0.264	1.01374e-132	Mitotic oogonia
LOC103379225	1.68752e-135	7.75837	0.588	0.301	3.52978e-131	Mitotic oogonia
LOC103378054	2.71416e-135	2.60621	0.509	0.216	5.67721e-131	Mitotic oogonia
LOC103389891	1.15034e-132	1.85919	0.583	0.288	2.40616e-128	Mitotic oogonia
LOC103377497	1.26746e-132	20.3095	0.529	0.239	2.65114e-128	Mitotic oogonia
LOC103382988	3.95965e-131	0.855427	0.333	0.098	8.28239e-127	Mitotic oogonia
tesk1	9.25361e-130	2.05436	0.545	0.262	1.93558e-125	Mitotic oogonia
LOC103381342	1.18008e-129	2.93245	0.546	0.262	2.46837e-125	Mitotic oogonia
rcc1	2.84922e-128	1.27857	0.522	0.24	5.95972e-124	Mitotic oogonia
LOC103394116	3.31307e-128	1.41947	0.544	0.263	6.92995e-124	Mitotic oogonia
orc1	3.46727e-128	0.944264	0.309	0.085	7.25249e-124	Mitotic oogonia
fbxo43	9.7284e-128	1.97632	0.481	0.204	2.03489e-123	Mitotic oogonia
tmem144	2.70765e-127	0.943986	0.562	0.268	5.6636e-123	Mitotic oogonia
LOC103381230	3.93614e-127	1.45518	0.607	0.319	8.23323e-123	Mitotic oogonia
aldh3b1	1.20707e-126	2.21664	0.48	0.209	2.52483e-122	Mitotic oogonia
fubp1	1.21741e-126	1.68451	0.574	0.291	2.54646e-122	Mitotic oogonia
bop1	1.81387e-125	2.43442	0.477	0.202	3.79406e-121	Mitotic oogonia
LOC103383897	1.09581e-123	3.851	0.487	0.216	2.29211e-119	Mitotic oogonia
odf2	5.08903e-122	1.07645	0.358	0.12	1.06447e-117	Mitotic oogonia
LOC103380616	2.43971e-121	0.894905	0.326	0.101	5.10315e-117	Mitotic oogonia
LOC103398430	2.87104e-121	8.40456	0.706	0.425	6.00536e-117	Mitotic oogonia
mcm4	2.96061e-119	1.84597	0.601	0.334	6.19271e-115	Mitotic oogonia
LOC103384869	6.50279e-118	1.50509	0.468	0.204	1.36019e-113	Mitotic oogonia
mcm3	8.58349e-118	1.43467	0.463	0.202	1.79541e-113	Mitotic oogonia
g3bp1	2.76153e-116	1.53148	0.454	0.195	5.77629e-112	Mitotic oogonia
LOC103394609	8.46544e-116	4.85915	0.669	0.402	1.77072e-111	Mitotic oogonia
cdc25b	1.1421e-115	0.689518	0.443	0.183	2.38894e-111	Mitotic oogonia
glul	3.81544e-114	1.23261	0.673	0.414	7.98076e-110	Mitotic oogonia
gtse1	5.33423e-114	0.629536	0.288	0.081	1.11576e-109	Mitotic oogonia
LOC103393550	2.25682e-113	1.29132	0.336	0.113	4.72059e-109	Mitotic oogonia
LOC103379363	4.53041e-113	0.388258	0.418	0.167	9.47625e-109	Mitotic oogonia
LOC103397434	2.09317e-112	1.50441	0.651	0.383	4.37828e-108	Mitotic oogonia
nup50	7.51742e-112	2.08084	0.528	0.263	1.57242e-107	Mitotic oogonia
snrpa	1.15445e-111	0.978495	0.505	0.238	2.41477e-107	Mitotic oogonia
LOC103395949	2.63443e-111	2.68699	0.698	0.445	5.51044e-107	Mitotic oogonia
pus3	3.29845e-111	1.55043	0.599	0.323	6.89936e-107	Mitotic oogonia
LOC103386383	4.66634e-111	1.13189	0.449	0.192	9.76057e-107	Mitotic oogonia
LOC103384291	1.51851e-110	1.87185	0.5	0.24	3.17626e-106	Mitotic oogonia
LOC103383947	2.15625e-110	1.79565	0.446	0.192	4.51023e-106	Mitotic oogonia
eif4g2	5.4711e-109	1.13157	0.496	0.237	1.14439e-104	Mitotic oogonia
LOC112487726	1.47998e-108	2.14289	0.491	0.231	3.09568e-104	Mitotic oogonia
LOC103379533	1.56997e-108	0.84907	0.453	0.2	3.2839e-104	Mitotic oogonia
tbl3	1.69676e-108	1.05369	0.476	0.221	3.54911e-104	Mitotic oogonia
heatr1	5.87813e-108	1.00111	0.337	0.118	1.22953e-103	Mitotic oogonia
LOC103382952	2.00629e-106	1.03886	0.409	0.169	4.19655e-102	Mitotic oogonia
LOC103396370	4.98016e-106	1.28353	0.389	0.153	1.0417e-101	Mitotic oogonia
wdr43	5.45408e-106	1.77333	0.501	0.247	1.14083e-101	Mitotic oogonia
LOC103382433	5.3011e-105	1.04178	0.328	0.114	1.10883e-100	Mitotic oogonia
LOC103391451	8.58012e-105	0.559184	0.452	0.206	1.7947e-100	Mitotic oogonia
LOC103383786	4.04269e-104	1.44904	0.275	0.08	8.45609e-100	Mitotic oogonia
LOC103393374	5.61029e-104	2.99477	0.655	0.377	1.1735e-99	Mitotic oogonia
LOC103390952	1.97308e-103	0.873008	0.343	0.123	4.12708e-99	Mitotic oogonia
gk	2.26579e-103	0.706196	0.338	0.12	4.73935e-99	Mitotic oogonia
LOC103393735	2.7947e-103	0.829526	0.332	0.117	5.84568e-99	Mitotic oogonia
nhp2	5.1669e-103	2.13534	0.776	0.525	1.08076e-98	Mitotic oogonia
LOC103391677	5.46452e-103	3.24276	0.757	0.538	1.14301e-98	Mitotic oogonia
LOC103384353	8.32231e-103	1.81264	0.463	0.216	1.74078e-98	Mitotic oogonia
LOC103396811	1.4192e-102	2.03713	0.406	0.17	2.96855e-98	Mitotic oogonia
tacc3	1.47651e-102	2.56245	0.54	0.284	3.08842e-98	Mitotic oogonia
LOC103381359	2.9904e-102	1.78897	0.548	0.287	6.25502e-98	Mitotic oogonia
hsd17b12	7.21529e-102	0.674816	0.282	0.086	1.50922e-97	Mitotic oogonia
LOC103387140	4.14143e-101	3.20623	0.383	0.153	8.66264e-97	Mitotic oogonia
LOC103396073	7.22328e-101	0.849609	0.42	0.187	1.51089e-96	Mitotic oogonia
nolc1	1.30627e-100	1.19691	0.469	0.223	2.73232e-96	Mitotic oogonia
LOC103383484	1.35235e-100	1.02952	0.387	0.157	2.82872e-96	Mitotic oogonia
gar1	1.79896e-100	0.837099	0.338	0.122	3.76289e-96	Mitotic oogonia
LOC103385172	2.20581e-99	10.6014	0.934	0.752	4.6139e-95	Mitotic oogonia
LOC103378738	4.77638e-99	0.664264	0.322	0.113	9.99075e-95	Mitotic oogonia
ddx18	7.25552e-99	2.37187	0.615	0.372	1.51764e-94	Mitotic oogonia
phf6	8.43126e-99	1.29975	0.379	0.155	1.76357e-94	Mitotic oogonia
mrpl17	1.00914e-98	0.796102	0.606	0.34	2.11082e-94	Mitotic oogonia
farsa	1.33212e-98	16.0088	0.817	0.604	2.7864e-94	Mitotic oogonia
plk1	5.99267e-98	0.918224	0.399	0.168	1.25349e-93	Mitotic oogonia
mcm2	1.113e-97	1.55566	0.406	0.176	2.32806e-93	Mitotic oogonia
atp8b1	1.21277e-97	0.822604	0.33	0.119	2.53675e-93	Mitotic oogonia
LOC112487260	1.51722e-97	4.08259	0.36	0.145	3.17357e-93	Mitotic oogonia
LOC103380195	1.66913e-97	0.597265	0.346	0.131	3.49133e-93	Mitotic oogonia
LOC107988646	1.86436e-97	1.30066	0.377	0.153	3.89969e-93	Mitotic oogonia
LOC103391345	1.49681e-96	0.806095	0.33	0.121	3.13087e-92	Mitotic oogonia
LOC103378164	3.80336e-96	1.06017	0.5	0.26	7.95549e-92	Mitotic oogonia
plrg1	9.20755e-96	1.19039	0.457	0.218	1.92594e-91	Mitotic oogonia
LOC103397495	2.39262e-95	1.92986	0.444	0.21	5.00463e-91	Mitotic oogonia
LOC103393414	6.90999e-95	0.775479	0.371	0.153	1.44536e-90	Mitotic oogonia
LOC103394540	9.83164e-95	0.264708	0.481	0.235	2.05649e-90	Mitotic oogonia
fam43a	1.29632e-94	2.65002	0.339	0.129	2.71152e-90	Mitotic oogonia
LOC103378444	1.76723e-94	1.40385	0.424	0.194	3.69652e-90	Mitotic oogonia
LOC103385189	3.58959e-94	1.62705	0.377	0.16	7.50835e-90	Mitotic oogonia
mau2	1.67981e-93	0.944524	0.41	0.181	3.51365e-89	Mitotic oogonia
LOC103396602	2.83832e-93	1.22997	0.35	0.137	5.93691e-89	Mitotic oogonia
aldh6a1	4.06618e-93	6.25513	0.557	0.323	8.50523e-89	Mitotic oogonia
cdt1	5.15921e-93	0.801115	0.36	0.146	1.07915e-88	Mitotic oogonia
tsen15	6.28234e-93	0.898414	0.366	0.149	1.31408e-88	Mitotic oogonia
sh3yl1	4.17247e-92	2.24756	0.407	0.179	8.72756e-88	Mitotic oogonia
alms1	5.79802e-92	1.3162	0.314	0.116	1.21277e-87	Mitotic oogonia
LOC103376865	8.19462e-92	0.855312	0.298	0.103	1.71407e-87	Mitotic oogonia
pum3	9.27155e-92	1.21867	0.359	0.147	1.93933e-87	Mitotic oogonia
vps39	1.50679e-91	0.940608	0.409	0.185	3.15175e-87	Mitotic oogonia
gdf9	7.91836e-91	0.948309	0.518	0.272	1.65628e-86	Mitotic oogonia
LOC103383045	1.13734e-90	3.00333	0.565	0.321	2.37897e-86	Mitotic oogonia
LOC103395915	5.40764e-90	0.954135	0.378	0.159	1.13112e-85	Mitotic oogonia
gabrb2	7.0282e-90	0.833988	0.267	0.085	1.47009e-85	Mitotic oogonia
nup160	9.26878e-90	1.44766	0.384	0.167	1.93875e-85	Mitotic oogonia
fem1b	2.07307e-89	0.654622	0.31	0.113	4.33624e-85	Mitotic oogonia
dpp3	2.234e-89	0.984949	0.384	0.166	4.67286e-85	Mitotic oogonia
LOC103385487	2.28618e-89	1.18514	0.528	0.291	4.78201e-85	Mitotic oogonia
c11h1orf74	7.32546e-89	0.940906	0.438	0.208	1.53227e-84	Mitotic oogonia
rrp12	1.14464e-88	0.998813	0.382	0.167	2.39424e-84	Mitotic oogonia
dgat2	7.21156e-88	0.867939	0.296	0.105	1.50844e-83	Mitotic oogonia
LOC107988844	1.37015e-87	0.650013	0.268	0.087	2.86595e-83	Mitotic oogonia
LOC103390137	1.92399e-87	1.07167	0.394	0.174	4.0244e-83	Mitotic oogonia
nin	3.27226e-87	0.782653	0.28	0.096	6.84458e-83	Mitotic oogonia
LOC103393470	7.67492e-87	9.04013	0.953	0.893	1.60536e-82	Mitotic oogonia
LOC103388038	7.96642e-87	0.793336	0.415	0.188	1.66634e-82	Mitotic oogonia
ftsj3	3.50097e-86	0.773365	0.338	0.136	7.32297e-82	Mitotic oogonia
LOC103392693	1.1074e-85	0.883019	0.365	0.155	2.31635e-81	Mitotic oogonia
reep2	1.18184e-85	0.778084	0.361	0.151	2.47206e-81	Mitotic oogonia
LOC103378294	2.3703e-85	0.973124	0.579	0.348	4.95796e-81	Mitotic oogonia
LOC103382849	4.29494e-85	0.739324	0.397	0.179	8.98372e-81	Mitotic oogonia
msh6	4.63556e-85	0.815069	0.39	0.176	9.69621e-81	Mitotic oogonia
cdkn2aipnl	7.40189e-85	0.782201	0.269	0.09	1.54825e-80	Mitotic oogonia
yae1d1	9.0806e-85	0.617968	0.27	0.09	1.89939e-80	Mitotic oogonia
LOC103388317	2.63416e-84	0.715662	0.29	0.104	5.50988e-80	Mitotic oogonia
LOC103383792	5.19947e-84	1.18811	0.311	0.12	1.08757e-79	Mitotic oogonia
LOC103386321	7.75413e-84	0.496725	0.274	0.093	1.62193e-79	Mitotic oogonia
noc3l	8.35463e-84	1.27055	0.409	0.191	1.74754e-79	Mitotic oogonia
LOC103389682	1.26938e-83	1.77611	0.537	0.302	2.65516e-79	Mitotic oogonia
fance	1.11732e-82	2.97612	0.389	0.179	2.33709e-78	Mitotic oogonia
LOC103381638	1.71864e-82	13.9495	0.634	0.4	3.59488e-78	Mitotic oogonia
2021-03-07	2.33797e-82	0.739062	0.322	0.13	4.89034e-78	Mitotic oogonia
lemd3	3.34808e-82	0.599673	0.315	0.123	7.00317e-78	Mitotic oogonia
psme3	1.56176e-81	1.06123	0.562	0.321	3.26674e-77	Mitotic oogonia
LOC103394526	1.60825e-81	1.1381	0.577	0.334	3.36398e-77	Mitotic oogonia
ahsa1	1.8989e-81	0.699043	0.302	0.116	3.97194e-77	Mitotic oogonia
LOC103393408	2.20454e-81	0.750287	0.409	0.19	4.61124e-77	Mitotic oogonia
nup205	3.25644e-81	0.757213	0.331	0.136	6.81151e-77	Mitotic oogonia
LOC103392195	5.1121e-81	0.290194	0.655	0.412	1.0693e-76	Mitotic oogonia
mcm7	1.86103e-80	0.93217	0.505	0.277	3.89272e-76	Mitotic oogonia
LOC103398423	2.03203e-80	0.964348	0.422	0.206	4.25039e-76	Mitotic oogonia
LOC103395841	2.03586e-80	0.986384	0.416	0.201	4.2584e-76	Mitotic oogonia
trmt13	2.8396e-80	0.602208	0.304	0.117	5.9396e-76	Mitotic oogonia
LOC103377926	3.19364e-80	0.742191	0.325	0.133	6.68014e-76	Mitotic oogonia
ganab	6.11544e-80	0.322902	0.373	0.166	1.27917e-75	Mitotic oogonia
LOC103399958	6.93439e-80	0.933727	0.311	0.123	1.45047e-75	Mitotic oogonia
dhrs3	9.92727e-80	0.533452	0.35	0.151	2.07649e-75	Mitotic oogonia
LOC103391498	1.24342e-79	1.19185	0.541	0.309	2.60087e-75	Mitotic oogonia
vmp1	1.6394e-79	0.76314	0.318	0.128	3.42914e-75	Mitotic oogonia
rgs14	7.28107e-79	0.384702	0.472	0.244	1.52298e-74	Mitotic oogonia
syne2	7.84147e-79	0.576718	0.256	0.087	1.6402e-74	Mitotic oogonia
LOC103390222	1.06026e-78	0.863982	0.34	0.145	2.21775e-74	Mitotic oogonia
parn	1.54839e-78	2.43295	0.51	0.291	3.23876e-74	Mitotic oogonia
prpf19	5.58037e-78	0.883753	0.422	0.211	1.16725e-73	Mitotic oogonia
vps9d1	7.53738e-78	0.540347	0.266	0.094	1.57659e-73	Mitotic oogonia
LOC103399814	7.53766e-78	0.774904	0.381	0.174	1.57665e-73	Mitotic oogonia
timm10	1.80052e-77	0.825853	0.338	0.142	3.76614e-73	Mitotic oogonia
utp4	2.97501e-77	0.897907	0.364	0.165	6.22282e-73	Mitotic oogonia
LOC103378277	4.18066e-77	0.836644	0.282	0.104	8.74469e-73	Mitotic oogonia
scpep1	5.62146e-77	5.75582	0.429	0.219	1.17584e-72	Mitotic oogonia
LOC103389806	5.83998e-77	0.384309	0.417	0.204	1.22155e-72	Mitotic oogonia
ppp4c	6.14503e-77	0.656643	0.321	0.131	1.28536e-72	Mitotic oogonia
exd2	6.18043e-77	1.27747	0.354	0.159	1.29276e-72	Mitotic oogonia
ccnb3	7.02907e-77	1.33991	0.418	0.205	1.47027e-72	Mitotic oogonia
aatf	8.31718e-77	0.662736	0.269	0.097	1.7397e-72	Mitotic oogonia
LOC103386889	1.52881e-76	0.676821	0.268	0.096	3.19781e-72	Mitotic oogonia
atf6b	1.74525e-76	0.86919	0.387	0.184	3.65055e-72	Mitotic oogonia
thop1	1.95647e-76	1.92905	0.507	0.288	4.09234e-72	Mitotic oogonia
abi2	2.79974e-76	0.869303	0.41	0.201	5.85623e-72	Mitotic oogonia
cacfd1	3.4762e-76	0.74527	0.337	0.146	7.27116e-72	Mitotic oogonia
LOC107988154	3.60557e-76	0.710258	0.314	0.127	7.54178e-72	Mitotic oogonia
fscn1	5.56889e-76	0.552656	0.396	0.19	1.16485e-71	Mitotic oogonia
ssrp1	1.93104e-75	0.952636	0.383	0.181	4.03916e-71	Mitotic oogonia
LOC103385354	3.96491e-75	1.083	0.341	0.148	8.2934e-71	Mitotic oogonia
racgap1	4.98657e-75	1.26111	0.367	0.168	1.04304e-70	Mitotic oogonia
LOC103386101	7.34033e-75	0.513967	0.31	0.127	1.53538e-70	Mitotic oogonia
gnl2	8.5228e-75	2.19673	0.399	0.195	1.78271e-70	Mitotic oogonia
coil	1.81387e-74	1.63097	0.272	0.1	3.79408e-70	Mitotic oogonia
nup107	1.93292e-74	1.68965	0.37	0.173	4.04309e-70	Mitotic oogonia
ctsa	6.93778e-74	1.5465	0.652	0.436	1.45118e-69	Mitotic oogonia
LOC103387325	7.48157e-74	0.568481	0.331	0.142	1.56492e-69	Mitotic oogonia
ipo9	8.16936e-74	0.762848	0.329	0.142	1.70878e-69	Mitotic oogonia
ube2w	9.03545e-74	0.46259	0.305	0.123	1.88995e-69	Mitotic oogonia
arl5b	1.00232e-73	0.420032	0.282	0.107	2.09655e-69	Mitotic oogonia
ncbp1	1.2817e-73	0.442965	0.274	0.102	2.68093e-69	Mitotic oogonia
LOC103389267	1.60562e-73	0.714199	0.301	0.123	3.35848e-69	Mitotic oogonia
ppig	2.43034e-73	1.95182	0.392	0.192	5.08355e-69	Mitotic oogonia
LOC103380446	2.93349e-73	0.604793	0.266	0.098	6.13598e-69	Mitotic oogonia
utp3	4.91326e-73	1.16826	0.389	0.19	1.02771e-68	Mitotic oogonia
prpf4	6.43784e-73	1.21534	0.423	0.219	1.3466e-68	Mitotic oogonia
LOC103397616	7.17443e-73	0.576805	0.289	0.114	1.50068e-68	Mitotic oogonia
ppp4r3b	9.61261e-73	0.935982	0.368	0.175	2.01067e-68	Mitotic oogonia
LOC103390626	1.61892e-72	1.90801	0.69	0.481	3.38628e-68	Mitotic oogonia
LOC103399882	2.30449e-72	1.37547	0.502	0.286	4.82029e-68	Mitotic oogonia
uhrf1	2.34012e-72	0.784335	0.297	0.12	4.89482e-68	Mitotic oogonia
zmynd19	2.7327e-72	0.785017	0.261	0.096	5.71599e-68	Mitotic oogonia
LOC103389958	3.98791e-72	0.525698	0.301	0.122	8.34151e-68	Mitotic oogonia
tmem97	4.65167e-72	0.595652	0.297	0.12	9.7299e-68	Mitotic oogonia
LOC103389361	1.61882e-71	1.42374	0.43	0.219	3.38609e-67	Mitotic oogonia
sybu	3.62313e-71	0.367065	0.378	0.179	7.57851e-67	Mitotic oogonia
donson	1.50574e-70	0.55552	0.256	0.094	3.14956e-66	Mitotic oogonia
brinp3	3.69124e-70	0.524627	0.269	0.102	7.72096e-66	Mitotic oogonia
meaf6	8.00468e-70	0.81576	0.433	0.226	1.67434e-65	Mitotic oogonia
plpbp	9.96465e-70	0.571557	0.351	0.162	2.08431e-65	Mitotic oogonia
gtpbp1	1.07004e-69	0.459769	0.303	0.126	2.2382e-65	Mitotic oogonia
LOC103380040	3.79121e-69	1.22408	0.343	0.157	7.93007e-65	Mitotic oogonia
xxylt1	4.05385e-69	0.929622	0.336	0.15	8.47944e-65	Mitotic oogonia
prpf40a	4.3854e-69	0.973832	0.314	0.135	9.17295e-65	Mitotic oogonia
sf3b4	6.89239e-69	0.802153	0.287	0.116	1.44168e-64	Mitotic oogonia
pum2	9.3205e-69	1.12449	0.339	0.158	1.94957e-64	Mitotic oogonia
emg1	9.90693e-69	0.755823	0.507	0.286	2.07223e-64	Mitotic oogonia
LOC103392920	1.13938e-68	0.806015	0.337	0.152	2.38324e-64	Mitotic oogonia
LOC103389486	1.72452e-68	0.810721	0.383	0.187	3.60717e-64	Mitotic oogonia
wdr33	1.76137e-68	0.775004	0.354	0.168	3.68425e-64	Mitotic oogonia
ube2s	2.22824e-68	1.14376	0.412	0.211	4.66082e-64	Mitotic oogonia
spc24	3.28573e-68	0.800736	0.287	0.117	6.87277e-64	Mitotic oogonia
LOC103389949	4.41265e-68	0.551242	0.264	0.101	9.22994e-64	Mitotic oogonia
LOC103397429	5.37729e-68	0.75142	0.263	0.1	1.12477e-63	Mitotic oogonia
ssh2	1.57588e-67	0.510137	0.279	0.112	3.29626e-63	Mitotic oogonia
LOC103389024	2.22243e-67	0.478335	0.259	0.098	4.64867e-63	Mitotic oogonia
gipc2	3.19322e-67	0.581961	0.26	0.099	6.67926e-63	Mitotic oogonia
med18	3.33621e-67	0.32452	0.297	0.123	6.97834e-63	Mitotic oogonia
mtfr1	3.87302e-67	0.520917	0.301	0.128	8.10119e-63	Mitotic oogonia
rad50	4.44009e-67	0.759676	0.317	0.139	9.28734e-63	Mitotic oogonia
LOC103393880	4.75343e-67	1.90617	0.452	0.257	9.94276e-63	Mitotic oogonia
LOC103395203	5.9384e-67	0.46862	0.251	0.093	1.24214e-62	Mitotic oogonia
ndufab1	6.79757e-67	0.755448	0.549	0.337	1.42185e-62	Mitotic oogonia
LOC103398525	1.27108e-66	0.952096	0.377	0.186	2.65872e-62	Mitotic oogonia
xrn2	1.37314e-66	0.689932	0.383	0.192	2.87219e-62	Mitotic oogonia
LOC103393908	1.46973e-66	9.08032	0.994	0.944	3.07424e-62	Mitotic oogonia
ppid	1.53282e-66	0.427955	0.401	0.202	3.20619e-62	Mitotic oogonia
tomm40	1.53774e-66	0.587647	0.273	0.11	3.21648e-62	Mitotic oogonia
LOC103387320	3.09311e-66	0.692009	0.336	0.154	6.46985e-62	Mitotic oogonia
LOC103383727	8.26627e-66	1.10846	0.398	0.203	1.72906e-61	Mitotic oogonia
LOC103385601	8.48502e-66	0.589641	0.261	0.102	1.77481e-61	Mitotic oogonia
pkn2	1.39802e-65	0.619389	0.283	0.117	2.92423e-61	Mitotic oogonia
slc25a20	1.47687e-65	0.517789	0.273	0.11	3.08918e-61	Mitotic oogonia
LOC103389560	1.51023e-65	0.682075	0.306	0.133	3.15894e-61	Mitotic oogonia
snw1	2.94163e-65	0.851493	0.378	0.191	6.153e-61	Mitotic oogonia
LOC103395304	4.74151e-65	0.831908	0.308	0.134	9.91782e-61	Mitotic oogonia
gemin2	7.03936e-65	0.597613	0.361	0.172	1.47242e-60	Mitotic oogonia
LOC103389475	8.96901e-65	0.531181	0.376	0.184	1.87605e-60	Mitotic oogonia
tmem53	1.38303e-64	0.641319	0.398	0.207	2.89289e-60	Mitotic oogonia
LOC103378109	1.46874e-64	0.52616	0.298	0.128	3.07216e-60	Mitotic oogonia
LOC103397654	1.51232e-64	0.558725	0.462	0.262	3.16333e-60	Mitotic oogonia
chd7	1.79875e-64	0.625152	0.464	0.267	3.76244e-60	Mitotic oogonia
nedd1	1.8505e-64	0.668624	0.283	0.119	3.8707e-60	Mitotic oogonia
c9h6orf120	2.79712e-64	0.491835	0.478	0.271	5.85074e-60	Mitotic oogonia
LOC103393491	2.92741e-64	0.785147	0.254	0.098	6.12327e-60	Mitotic oogonia
LOC103377802	3.79254e-64	0.667054	0.251	0.096	7.93285e-60	Mitotic oogonia
epb41	4.64506e-64	0.568953	0.256	0.1	9.71607e-60	Mitotic oogonia
LOC103383557	6.3503e-64	1.42284	0.459	0.26	1.32829e-59	Mitotic oogonia
cnot1	7.58768e-64	1.24912	0.457	0.262	1.58711e-59	Mitotic oogonia
ide	1.11924e-63	1.05245	0.29	0.124	2.34111e-59	Mitotic oogonia
ncapg	1.84629e-63	0.884854	0.316	0.143	3.86188e-59	Mitotic oogonia
LOC103383051	1.97524e-63	1.88619	0.454	0.258	4.13162e-59	Mitotic oogonia
strn3	2.76758e-63	0.536796	0.254	0.098	5.78894e-59	Mitotic oogonia
LOC103394109	2.92081e-63	0.430432	0.281	0.117	6.10945e-59	Mitotic oogonia
LOC103385145	2.9578e-63	0.598217	0.366	0.182	6.18684e-59	Mitotic oogonia
rpf1	3.14678e-63	0.71336	0.5	0.292	6.58213e-59	Mitotic oogonia
fen1	3.69061e-63	0.477731	0.28	0.117	7.71966e-59	Mitotic oogonia
txn2	3.97616e-63	0.437755	0.492	0.285	8.31694e-59	Mitotic oogonia
arhgap8	3.9998e-63	0.508085	0.29	0.125	8.36639e-59	Mitotic oogonia
nsfl1c	5.9399e-63	0.732169	0.378	0.192	1.24245e-58	Mitotic oogonia
LOC103389688	6.42943e-63	0.651747	0.526	0.319	1.34484e-58	Mitotic oogonia
sigmar1	7.0016e-63	1.55878	0.346	0.166	1.46452e-58	Mitotic oogonia
rpp40	2.18445e-62	1.02351	0.44	0.245	4.56922e-58	Mitotic oogonia
LOC103390759	2.20629e-62	0.816486	0.331	0.155	4.61489e-58	Mitotic oogonia
LOC103377787	2.62771e-62	0.609126	0.319	0.145	5.49638e-58	Mitotic oogonia
thoc6	2.84547e-62	0.720358	0.333	0.155	5.95186e-58	Mitotic oogonia
mrpl12	3.35231e-62	0.516824	0.319	0.146	7.01202e-58	Mitotic oogonia
LOC103382388	3.69164e-62	0.666222	0.303	0.136	7.7218e-58	Mitotic oogonia
fam76b	4.99848e-62	0.795149	0.321	0.151	1.04553e-57	Mitotic oogonia
tstd2	5.20696e-62	0.599326	0.301	0.134	1.08914e-57	Mitotic oogonia
rbm22	5.30088e-62	0.904312	0.46	0.264	1.10879e-57	Mitotic oogonia
LOC103384089	9.02287e-62	0.54084	0.304	0.139	1.88731e-57	Mitotic oogonia
pdcd2l	1.0499e-61	0.779269	0.382	0.195	2.19607e-57	Mitotic oogonia
trmt10c	1.15276e-61	0.536605	0.254	0.1	2.41124e-57	Mitotic oogonia
LOC103394381	1.1948e-61	0.338299	0.255	0.101	2.49916e-57	Mitotic oogonia
spsb1	1.37081e-61	0.549247	0.272	0.113	2.86732e-57	Mitotic oogonia
eml2	1.69987e-61	0.631751	0.381	0.197	3.55562e-57	Mitotic oogonia
LOC103396069	1.76765e-61	1.30193	0.466	0.271	3.6974e-57	Mitotic oogonia
patl2	2.11319e-61	0.463107	0.254	0.101	4.42015e-57	Mitotic oogonia
eny2	4.60302e-61	0.410735	0.392	0.202	9.62814e-57	Mitotic oogonia
LOC103393672	5.69111e-61	0.729091	0.294	0.132	1.19041e-56	Mitotic oogonia
LOC103391328	1.08734e-60	1.66521	0.405	0.218	2.27438e-56	Mitotic oogonia
etfb	1.12505e-60	1.05136	0.382	0.199	2.35327e-56	Mitotic oogonia
cct8	2.48046e-60	0.684599	0.69	0.514	5.18838e-56	Mitotic oogonia
chaf1a	3.76726e-60	1.0398	0.275	0.117	7.87997e-56	Mitotic oogonia
sytl1	3.93386e-60	1.80738	0.394	0.21	8.22845e-56	Mitotic oogonia
kif22	4.5819e-60	0.440083	0.263	0.108	9.58396e-56	Mitotic oogonia
LOC103397582	5.99078e-60	0.767352	0.419	0.232	1.25309e-55	Mitotic oogonia
LOC103384614	7.04217e-60	0.684999	0.286	0.124	1.47301e-55	Mitotic oogonia
LOC103386924	8.10946e-60	0.465818	0.642	0.441	1.69626e-55	Mitotic oogonia
znrd1	1.09242e-59	0.986302	0.444	0.251	2.28501e-55	Mitotic oogonia
tnpo3	2.15609e-59	0.578575	0.297	0.133	4.5099e-55	Mitotic oogonia
fzr1	2.28324e-59	0.655491	0.32	0.149	4.77585e-55	Mitotic oogonia
homer2	2.45655e-59	0.530933	0.354	0.176	5.13836e-55	Mitotic oogonia
nup98	3.37179e-59	0.983235	0.364	0.187	7.05278e-55	Mitotic oogonia
pycr3	3.50364e-59	0.726789	0.309	0.142	7.32856e-55	Mitotic oogonia
rpusd2	3.53036e-59	1.5533	0.314	0.145	7.38445e-55	Mitotic oogonia
LOC103389255	4.62079e-59	0.513315	0.295	0.133	9.66531e-55	Mitotic oogonia
noc2l	5.81702e-59	1.09764	0.4	0.216	1.21675e-54	Mitotic oogonia
txlna	8.79916e-59	0.801364	0.457	0.267	1.84052e-54	Mitotic oogonia
mcmbp	1.86971e-58	0.786575	0.349	0.173	3.91088e-54	Mitotic oogonia
actr6	2.29127e-58	0.683969	0.446	0.257	4.79266e-54	Mitotic oogonia
LOC103383749	2.99059e-58	0.312093	0.372	0.193	6.25542e-54	Mitotic oogonia
bcl2l14	6.2389e-58	0.608614	0.346	0.172	1.30499e-53	Mitotic oogonia
LOC103394740	6.28286e-58	0.851811	0.31	0.144	1.31419e-53	Mitotic oogonia
bub3	9.11216e-58	1.04418	0.407	0.218	1.90599e-53	Mitotic oogonia
LOC103391923	1.15991e-57	0.698145	0.3	0.138	2.42617e-53	Mitotic oogonia
gtpbp4	1.65839e-57	4.43068	0.674	0.488	3.46885e-53	Mitotic oogonia
LOC103379914	2.3028e-57	1.83231	0.606	0.405	4.81676e-53	Mitotic oogonia
tent4b	2.86629e-57	0.622835	0.265	0.113	5.99543e-53	Mitotic oogonia
arl6ip1	3.58477e-57	11.0464	0.497	0.311	7.49826e-53	Mitotic oogonia
grwd1	1.5006e-56	1.20898	0.37	0.193	3.1388e-52	Mitotic oogonia
LOC103378457	2.19172e-56	0.777437	0.426	0.24	4.58442e-52	Mitotic oogonia
LOC103385488	2.65472e-56	0.593967	0.541	0.329	5.55289e-52	Mitotic oogonia
nop2	3.29278e-56	0.338729	0.386	0.205	6.88751e-52	Mitotic oogonia
cnot8	5.74599e-56	0.463039	0.34	0.169	1.20189e-51	Mitotic oogonia
srsf2	5.76152e-56	1.02254	0.607	0.41	1.20514e-51	Mitotic oogonia
acat2	7.91865e-56	0.455386	0.347	0.174	1.65634e-51	Mitotic oogonia
nutf2	1.21162e-55	2.9672	0.607	0.419	2.53435e-51	Mitotic oogonia
c11h12orf10	1.57469e-55	0.41163	0.341	0.169	3.29378e-51	Mitotic oogonia
hspa14	2.21491e-55	0.47358	0.285	0.128	4.63292e-51	Mitotic oogonia
wdr74	4.55974e-55	0.572524	0.333	0.163	9.5376e-51	Mitotic oogonia
LOC103379720	5.29659e-55	0.7569	0.266	0.117	1.10789e-50	Mitotic oogonia
ncln	1.06373e-54	0.559008	0.306	0.146	2.225e-50	Mitotic oogonia
aaas	1.28543e-54	0.436521	0.283	0.127	2.68873e-50	Mitotic oogonia
LOC103379479	2.27406e-54	0.697357	0.379	0.205	4.75664e-50	Mitotic oogonia
dusp10	3.83612e-54	0.533009	0.29	0.134	8.02402e-50	Mitotic oogonia
hnrnpc	4.24528e-54	0.90913	0.4	0.225	8.87985e-50	Mitotic oogonia
LOC103378568	4.80206e-54	2.04889	0.442	0.269	1.00445e-49	Mitotic oogonia
slc3a2	1.0919e-53	2.84138	0.606	0.423	2.28393e-49	Mitotic oogonia
arid1a	1.2178e-53	1.08741	0.348	0.182	2.54727e-49	Mitotic oogonia
LOC103396980	1.89124e-53	0.384846	0.386	0.212	3.9559e-49	Mitotic oogonia
LOC103388886	3.15038e-53	0.656934	0.281	0.13	6.58965e-49	Mitotic oogonia
LOC103395101	3.36375e-53	0.480707	0.394	0.222	7.03596e-49	Mitotic oogonia
dck	4.00333e-53	0.899967	0.295	0.139	8.37376e-49	Mitotic oogonia
LOC103393826	6.96575e-53	0.398287	0.342	0.174	1.45703e-48	Mitotic oogonia
rwdd2b	7.96245e-53	0.269066	0.288	0.133	1.66551e-48	Mitotic oogonia
srp68	1.42413e-52	0.560255	0.314	0.155	2.97884e-48	Mitotic oogonia
usp1	3.07658e-52	0.506895	0.289	0.136	6.43529e-48	Mitotic oogonia
baz1a	3.66764e-52	0.385981	0.26	0.114	7.6716e-48	Mitotic oogonia
LOC103393872	6.43373e-52	0.640557	0.266	0.12	1.34574e-47	Mitotic oogonia
dus4l	6.98377e-52	0.46998	0.266	0.118	1.46079e-47	Mitotic oogonia
lsm14a	7.54476e-52	0.527692	0.28	0.129	1.57814e-47	Mitotic oogonia
LOC103389844	1.06395e-51	0.377722	0.294	0.139	2.22546e-47	Mitotic oogonia
zc3h15	1.26669e-51	0.863478	0.36	0.192	2.64953e-47	Mitotic oogonia
dis3l2	1.2764e-51	0.451952	0.288	0.136	2.66985e-47	Mitotic oogonia
orc3	1.53734e-51	0.710874	0.292	0.139	3.21565e-47	Mitotic oogonia
wdr36	1.62249e-51	1.56027	0.276	0.127	3.39376e-47	Mitotic oogonia
bms1	1.7809e-51	0.562686	0.315	0.158	3.72511e-47	Mitotic oogonia
prkag1	2.86436e-51	0.557595	0.333	0.171	5.99137e-47	Mitotic oogonia
jpt2	6.0073e-51	0.518358	0.316	0.155	1.25655e-46	Mitotic oogonia
ppp2ca	7.76014e-51	0.489514	0.32	0.161	1.62319e-46	Mitotic oogonia
rbmx2	1.01548e-50	0.948428	0.329	0.168	2.12408e-46	Mitotic oogonia
usp36	1.29812e-50	0.640943	0.259	0.115	2.71529e-46	Mitotic oogonia
LOC103385154	1.87771e-50	0.602413	0.376	0.206	3.9276e-46	Mitotic oogonia
cnpy2	1.98886e-50	1.43445	0.422	0.243	4.16009e-46	Mitotic oogonia
riok2	3.39992e-50	1.07269	0.31	0.157	7.11162e-46	Mitotic oogonia
haus6	6.83374e-50	3.50219	0.463	0.289	1.42941e-45	Mitotic oogonia
LOC103394932	7.16821e-50	0.793611	0.371	0.202	1.49937e-45	Mitotic oogonia
LOC103395865	7.87593e-50	0.590444	0.263	0.118	1.64741e-45	Mitotic oogonia
LOC103384303	8.19283e-50	0.543829	0.294	0.143	1.71369e-45	Mitotic oogonia
LOC103386829	8.30101e-50	2.24965	0.749	0.604	1.73632e-45	Mitotic oogonia
LOC103394483	9.19478e-50	0.544646	0.429	0.256	1.92327e-45	Mitotic oogonia
LOC103382807	1.32661e-49	0.50962	0.325	0.167	2.77486e-45	Mitotic oogonia
ctso	1.36625e-49	1.45414	0.478	0.292	2.85778e-45	Mitotic oogonia
dkc1	1.60933e-49	1.14678	0.509	0.335	3.36623e-45	Mitotic oogonia
LOC103387511	1.71282e-49	1.51385	0.526	0.334	3.5827e-45	Mitotic oogonia
rnps1	1.85903e-49	0.838519	0.519	0.335	3.88854e-45	Mitotic oogonia
LOC103378913	2.32474e-49	0.448734	0.282	0.133	4.86266e-45	Mitotic oogonia
c1d	2.41469e-49	2.92262	0.529	0.343	5.05082e-45	Mitotic oogonia
LOC103391224	2.46522e-49	0.580382	0.267	0.124	5.15651e-45	Mitotic oogonia
supt4h1	2.79982e-49	2.75429	0.516	0.341	5.85638e-45	Mitotic oogonia
cep44	6.21775e-49	0.285765	0.255	0.114	1.30057e-44	Mitotic oogonia
gins1	9.94677e-49	0.834014	0.286	0.136	2.08056e-44	Mitotic oogonia
immt	1.22221e-48	0.501215	0.337	0.178	2.5565e-44	Mitotic oogonia
ywhae	1.3853e-48	0.781768	0.389	0.219	2.89763e-44	Mitotic oogonia
odc1	1.60988e-48	0.545548	0.329	0.174	3.3674e-44	Mitotic oogonia
znf839	1.67939e-48	0.639094	0.277	0.133	3.51279e-44	Mitotic oogonia
ahctf1	2.07663e-48	0.524887	0.254	0.115	4.34369e-44	Mitotic oogonia
pxn	2.1377e-48	0.472855	0.299	0.148	4.47142e-44	Mitotic oogonia
kcnn4	2.71954e-48	0.551051	0.279	0.134	5.68845e-44	Mitotic oogonia
LOC103383087	4.35278e-48	0.906317	0.329	0.173	9.10471e-44	Mitotic oogonia
nup153	4.65806e-48	0.710493	0.324	0.17	9.74327e-44	Mitotic oogonia
cwf19l1	4.86589e-48	0.541941	0.318	0.165	1.0178e-43	Mitotic oogonia
cdkn1b	6.53952e-48	0.260579	0.351	0.191	1.36787e-43	Mitotic oogonia
phgdh	9.00656e-48	1.02977	0.291	0.141	1.8839e-43	Mitotic oogonia
picalm	1.11833e-47	0.587524	0.326	0.172	2.33921e-43	Mitotic oogonia
apc	1.27052e-47	0.524793	0.319	0.164	2.65756e-43	Mitotic oogonia
ranbp1	1.58831e-47	0.294613	0.274	0.13	3.32227e-43	Mitotic oogonia
LOC103379958	1.88752e-47	0.699683	0.271	0.129	3.94812e-43	Mitotic oogonia
cbx5	2.04327e-47	0.671281	0.371	0.21	4.27391e-43	Mitotic oogonia
srpk1	2.23947e-47	0.475808	0.333	0.175	4.68429e-43	Mitotic oogonia
LOC103385578	2.27122e-47	0.724887	0.318	0.165	4.75071e-43	Mitotic oogonia
plod2	2.71108e-47	0.374261	0.3	0.152	5.67076e-43	Mitotic oogonia
timm29	2.81898e-47	0.677796	0.468	0.287	5.89646e-43	Mitotic oogonia
ilk	2.86945e-47	0.82175	0.315	0.163	6.00202e-43	Mitotic oogonia
LOC103396018	3.18379e-47	0.37219	0.301	0.152	6.65953e-43	Mitotic oogonia
LOC103378138	4.32727e-47	0.424088	0.293	0.144	9.05135e-43	Mitotic oogonia
pex13	5.01725e-47	0.690632	0.321	0.168	1.04946e-42	Mitotic oogonia
nol11	5.89881e-47	0.39161	0.259	0.119	1.23385e-42	Mitotic oogonia
zc3h14	1.49034e-46	0.409338	0.252	0.116	3.11734e-42	Mitotic oogonia
LOC103383559	1.66579e-46	0.411841	0.262	0.122	3.48433e-42	Mitotic oogonia
zcchc9	1.71421e-46	0.263771	0.38	0.213	3.58562e-42	Mitotic oogonia
nup62	5.47767e-46	0.536317	0.378	0.214	1.14576e-41	Mitotic oogonia
LOC103387404	7.48126e-46	0.538789	0.296	0.149	1.56485e-41	Mitotic oogonia
nucks1	1.06845e-45	0.585328	0.366	0.204	2.23488e-41	Mitotic oogonia
zwilch	1.41479e-45	0.25637	0.341	0.183	2.95931e-41	Mitotic oogonia
LOC103378276	1.49829e-45	1.86122	0.404	0.239	3.13397e-41	Mitotic oogonia
naa15	1.94729e-45	0.680655	0.31	0.162	4.07315e-41	Mitotic oogonia
LOC103377625	1.9785e-45	0.860632	0.408	0.243	4.13843e-41	Mitotic oogonia
sf3a2	2.2525e-45	0.476965	0.351	0.193	4.71155e-41	Mitotic oogonia
glg1	3.49078e-45	0.432868	0.254	0.12	7.30167e-41	Mitotic oogonia
LOC103386258	3.74473e-45	0.714671	0.257	0.121	7.83286e-41	Mitotic oogonia
rab5if	4.69177e-45	0.356057	0.392	0.225	9.81378e-41	Mitotic oogonia
ccar1	5.78657e-45	0.826563	0.309	0.16	1.21038e-40	Mitotic oogonia
LOC103377847	7.41121e-45	0.525005	0.291	0.145	1.5502e-40	Mitotic oogonia
snapc1	1.06098e-44	0.393322	0.252	0.118	2.21925e-40	Mitotic oogonia
kdm6a	1.24732e-44	0.830816	0.28	0.139	2.60901e-40	Mitotic oogonia
LOC103393948	1.3421e-44	0.775763	0.456	0.289	2.80727e-40	Mitotic oogonia
wdr77	1.86812e-44	0.515392	0.448	0.275	3.90755e-40	Mitotic oogonia
ckap5	2.92284e-44	0.719818	0.286	0.144	6.11369e-40	Mitotic oogonia
tut1	3.17538e-44	0.740723	0.277	0.139	6.64193e-40	Mitotic oogonia
LOC103394298	5.66978e-44	1.4177	0.354	0.199	1.18595e-39	Mitotic oogonia
bccip	7.46711e-44	0.348474	0.384	0.223	1.5619e-39	Mitotic oogonia
mrpl46	1.33455e-43	0.371561	0.287	0.146	2.79148e-39	Mitotic oogonia
spns1	2.61591e-43	0.403646	0.294	0.153	5.47171e-39	Mitotic oogonia
LOC103382167	3.02153e-43	0.58372	0.348	0.192	6.32013e-39	Mitotic oogonia
usp10	3.92867e-43	1.09265	0.294	0.153	8.21759e-39	Mitotic oogonia
clcc1	4.72486e-43	0.52082	0.265	0.13	9.88299e-39	Mitotic oogonia
pus1	5.1554e-43	0.381488	0.284	0.144	1.07835e-38	Mitotic oogonia
LOC103389987	5.18354e-43	0.694693	0.286	0.145	1.08424e-38	Mitotic oogonia
fxr1	6.83861e-43	0.910517	0.269	0.133	1.43043e-38	Mitotic oogonia
tfb2m	6.96238e-43	0.532847	0.387	0.228	1.45632e-38	Mitotic oogonia
paip2b	7.84867e-43	0.71405	0.455	0.294	1.64171e-38	Mitotic oogonia
hmgcl	9.57578e-43	0.585748	0.284	0.143	2.00297e-38	Mitotic oogonia
LOC103391318	1.34491e-42	0.552819	0.301	0.157	2.81316e-38	Mitotic oogonia
LOC103388613	2.02404e-42	0.70612	0.343	0.193	4.23368e-38	Mitotic oogonia
wdr75	2.67192e-42	0.497762	0.314	0.167	5.58886e-38	Mitotic oogonia
nup35	3.67865e-42	0.279578	0.272	0.134	7.69464e-38	Mitotic oogonia
trir	3.81774e-42	0.605346	0.459	0.292	7.98557e-38	Mitotic oogonia
LOC103378498	4.11155e-42	0.505164	0.331	0.183	8.60013e-38	Mitotic oogonia
clpb	4.19474e-42	0.986596	0.278	0.141	8.77415e-38	Mitotic oogonia
ankfn1	4.24155e-42	0.568751	0.257	0.127	8.87204e-38	Mitotic oogonia
sf3b2	4.56116e-42	2.1319	0.315	0.169	9.54057e-38	Mitotic oogonia
LOC103381595	4.98282e-42	0.745492	0.404	0.249	1.04226e-37	Mitotic oogonia
hells	5.25271e-42	0.875005	0.377	0.219	1.09871e-37	Mitotic oogonia
snrpc	6.79353e-42	3.40146	0.601	0.427	1.421e-37	Mitotic oogonia
atic	1.14732e-41	0.373132	0.258	0.126	2.39984e-37	Mitotic oogonia
LOC103380397	1.19872e-41	0.679823	0.327	0.182	2.50736e-37	Mitotic oogonia
ptpn9	1.51511e-41	0.379945	0.258	0.125	3.16915e-37	Mitotic oogonia
rnf168	2.06187e-41	0.455363	0.282	0.145	4.3128e-37	Mitotic oogonia
LOC103383281	2.16907e-41	0.509655	0.259	0.128	4.53705e-37	Mitotic oogonia
LOC112487757	2.20424e-41	0.423809	0.305	0.159	4.6106e-37	Mitotic oogonia
LOC103377595	2.7222e-41	0.332585	0.263	0.13	5.69403e-37	Mitotic oogonia
LOC103394004	2.72795e-41	0.718486	0.334	0.185	5.70606e-37	Mitotic oogonia
patl1	2.89826e-41	0.45305	0.258	0.126	6.06229e-37	Mitotic oogonia
vldlr	4.3379e-41	0.778197	0.267	0.135	9.07358e-37	Mitotic oogonia
ppm1b	4.40056e-41	0.987309	0.276	0.141	9.20465e-37	Mitotic oogonia
faf2	6.11459e-41	0.454229	0.283	0.146	1.27899e-36	Mitotic oogonia
LOC103380280	6.601e-41	40.2827	0.333	0.188	1.38073e-36	Mitotic oogonia
dnajc25	1.78243e-40	0.369069	0.428	0.268	3.72831e-36	Mitotic oogonia
LOC103386141	3.24277e-40	0.402342	0.35	0.201	6.78291e-36	Mitotic oogonia
gtf2f1	3.58687e-40	0.619472	0.363	0.211	7.50266e-36	Mitotic oogonia
htatsf1	3.75214e-40	0.30872	0.253	0.123	7.84836e-36	Mitotic oogonia
trmt5	5.33752e-40	0.447801	0.273	0.141	1.11645e-35	Mitotic oogonia
LOC103394065	5.39678e-40	0.601341	0.454	0.292	1.12884e-35	Mitotic oogonia
taf5l	7.51682e-40	0.5818	0.258	0.128	1.57229e-35	Mitotic oogonia
LOC103391146	7.88057e-40	0.648186	0.276	0.141	1.64838e-35	Mitotic oogonia
sumo1	8.17594e-40	0.762294	0.407	0.253	1.71016e-35	Mitotic oogonia
sh3bgrl3	8.51796e-40	0.464443	0.273	0.139	1.7817e-35	Mitotic oogonia
wdr18	9.59088e-40	0.372011	0.357	0.205	2.00612e-35	Mitotic oogonia
zdhhc13	1.00589e-39	0.296211	0.258	0.128	2.10402e-35	Mitotic oogonia
prkcsh	1.22872e-39	0.337091	0.315	0.173	2.5701e-35	Mitotic oogonia
LOC103389639	1.80826e-39	0.895455	0.54	0.371	3.78234e-35	Mitotic oogonia
med19	2.09412e-39	1.74189	0.429	0.274	4.38027e-35	Mitotic oogonia
mrpl37	2.73986e-39	0.541947	0.332	0.187	5.73097e-35	Mitotic oogonia
LOC103389960	3.96694e-39	1.30972	0.424	0.271	8.29765e-35	Mitotic oogonia
LOC103394984	3.97924e-39	0.490896	0.275	0.141	8.32338e-35	Mitotic oogonia
trpc4ap	4.06814e-39	1.10603	0.286	0.151	8.50932e-35	Mitotic oogonia
mrps9	4.53682e-39	0.567345	0.264	0.135	9.48967e-35	Mitotic oogonia
LOC103396585	8.30882e-39	0.27516	0.257	0.128	1.73796e-34	Mitotic oogonia
cct7	8.32214e-39	1.46597	0.585	0.433	1.74074e-34	Mitotic oogonia
paics	8.41862e-39	8.05007	0.596	0.425	1.76092e-34	Mitotic oogonia
LOC103379370	8.458e-39	0.347637	0.388	0.237	1.76916e-34	Mitotic oogonia
rps7	9.11351e-39	1.08032	0.993	0.988	1.90627e-34	Mitotic oogonia
sarnp	1.04091e-38	0.475257	0.308	0.168	2.17727e-34	Mitotic oogonia
sssca1	1.19068e-38	0.445577	0.381	0.229	2.49055e-34	Mitotic oogonia
spryd4	1.36425e-38	0.317896	0.265	0.134	2.85359e-34	Mitotic oogonia
neil1	1.97334e-38	0.502165	0.326	0.183	4.12764e-34	Mitotic oogonia
LOC103379609	3.17308e-38	1.37829	0.416	0.264	6.63713e-34	Mitotic oogonia
LOC103391373	4.66235e-38	0.697113	0.29	0.157	9.75223e-34	Mitotic oogonia
prpf8	7.38936e-38	0.791386	0.369	0.223	1.54563e-33	Mitotic oogonia
LOC103385789	7.55107e-38	0.332973	0.281	0.148	1.57946e-33	Mitotic oogonia
LOC103385532	7.62808e-38	1.04968	0.541	0.384	1.59557e-33	Mitotic oogonia
glmp	8.07152e-38	0.41397	0.299	0.165	1.68832e-33	Mitotic oogonia
cyfip1	1.50118e-37	0.383236	0.301	0.165	3.14003e-33	Mitotic oogonia
jtb	1.78273e-37	0.536177	0.388	0.238	3.72893e-33	Mitotic oogonia
LOC103391683	1.89164e-37	0.637651	0.289	0.156	3.95675e-33	Mitotic oogonia
LOC103384510	2.16355e-37	1.01569	0.45	0.296	4.5255e-33	Mitotic oogonia
etf1	3.93935e-37	0.466794	0.304	0.168	8.23994e-33	Mitotic oogonia
abce1	6.14937e-37	0.416043	0.287	0.155	1.28626e-32	Mitotic oogonia
LOC103389985	6.68753e-37	0.551087	0.255	0.13	1.39883e-32	Mitotic oogonia
kiaa0391	6.79864e-37	0.498379	0.299	0.165	1.42207e-32	Mitotic oogonia
nap1l1	6.87939e-37	0.719192	0.496	0.347	1.43896e-32	Mitotic oogonia
LOC103385639	7.26011e-37	0.370916	0.254	0.128	1.5186e-32	Mitotic oogonia
polr2d	8.54128e-37	2.14782	0.406	0.255	1.78658e-32	Mitotic oogonia
LOC103391057	9.97608e-37	0.301154	0.273	0.145	2.0867e-32	Mitotic oogonia
rnf40	1.33102e-36	0.695302	0.26	0.136	2.7841e-32	Mitotic oogonia
LOC103379348	1.80205e-36	0.409696	0.411	0.259	3.76935e-32	Mitotic oogonia
cul1	2.13278e-36	0.4926	0.34	0.201	4.46114e-32	Mitotic oogonia
smyd3	2.20414e-36	0.693343	0.282	0.152	4.6104e-32	Mitotic oogonia
prr5l	2.65163e-36	0.456312	0.271	0.142	5.54641e-32	Mitotic oogonia
LOC103397940	2.75038e-36	0.277939	0.304	0.171	5.75296e-32	Mitotic oogonia
rars	3.8685e-36	0.60832	0.334	0.196	8.09174e-32	Mitotic oogonia
trub1	3.36982e-35	0.452693	0.297	0.165	7.04865e-31	Mitotic oogonia
draxin	3.37966e-35	0.776496	0.281	0.152	7.06924e-31	Mitotic oogonia
rcan1	3.67097e-35	0.519208	0.3	0.167	7.67856e-31	Mitotic oogonia
mtx2	7.76047e-35	0.34468	0.369	0.225	1.62326e-30	Mitotic oogonia
rbmx	7.93903e-35	0.449825	0.316	0.182	1.66061e-30	Mitotic oogonia
poldip3	9.64583e-35	0.445085	0.293	0.163	2.01762e-30	Mitotic oogonia
zcchc10	1.57151e-34	0.704377	0.334	0.196	3.28712e-30	Mitotic oogonia
LOC103392049	2.07718e-34	2.18046	0.303	0.174	4.34484e-30	Mitotic oogonia
LOC103393926	2.26913e-34	0.515197	0.398	0.252	4.74634e-30	Mitotic oogonia
timm23	2.41798e-34	0.436821	0.258	0.135	5.05769e-30	Mitotic oogonia
fam136a	2.88066e-34	0.399374	0.282	0.154	6.02548e-30	Mitotic oogonia
LOC103390988	4.38542e-34	0.546835	0.305	0.174	9.17299e-30	Mitotic oogonia
LOC103396852	5.93956e-34	5.00585	0.544	0.401	1.24238e-29	Mitotic oogonia
tsfm	1.00709e-33	0.414532	0.266	0.141	2.10652e-29	Mitotic oogonia
LOC103389710	1.08917e-33	0.472793	0.303	0.172	2.27821e-29	Mitotic oogonia
slc39a3	1.35612e-33	0.617274	0.253	0.134	2.8366e-29	Mitotic oogonia
LOC103397732	1.42237e-33	0.308181	0.305	0.174	2.97517e-29	Mitotic oogonia
LOC103395900	1.47973e-33	0.281576	0.252	0.133	3.09514e-29	Mitotic oogonia
nuf2	1.69438e-33	0.469236	0.328	0.193	3.54415e-29	Mitotic oogonia
zpr1	2.94042e-33	0.559743	0.348	0.211	6.15048e-29	Mitotic oogonia
tubb	3.98695e-33	1.91112	0.442	0.292	8.3395e-29	Mitotic oogonia
tcp1	4.25988e-33	3.19226	0.538	0.392	8.91039e-29	Mitotic oogonia
tma16	7.02705e-33	0.472144	0.332	0.2	1.46985e-28	Mitotic oogonia
ovca2	1.04096e-32	0.547642	0.287	0.162	2.17737e-28	Mitotic oogonia
lrrc59	1.16641e-32	0.337992	0.327	0.194	2.43978e-28	Mitotic oogonia
tmem129	1.8869e-32	0.353123	0.298	0.171	3.94683e-28	Mitotic oogonia
LOC103389721	2.10409e-32	0.497262	0.306	0.179	4.40112e-28	Mitotic oogonia
LOC103393530	2.64519e-32	0.296292	0.361	0.224	5.53295e-28	Mitotic oogonia
prpf38a	5.79262e-32	0.316672	0.358	0.221	1.21164e-27	Mitotic oogonia
rer1	6.29351e-32	0.289067	0.293	0.169	1.31641e-27	Mitotic oogonia
blmh	1.05719e-31	0.741086	0.384	0.245	2.21132e-27	Mitotic oogonia
mettl18	1.36126e-31	0.323807	0.264	0.145	2.84735e-27	Mitotic oogonia
slc10a3	2.01876e-31	0.340815	0.251	0.135	4.22265e-27	Mitotic oogonia
LOC103389570	2.77548e-31	1.21631	0.348	0.216	5.80547e-27	Mitotic oogonia
paxbp1	1.30382e-30	0.388618	0.26	0.145	2.7272e-26	Mitotic oogonia
eci1	1.82182e-30	0.42696	0.387	0.249	3.81069e-26	Mitotic oogonia
phf8	4.39263e-30	0.548756	0.323	0.197	9.18807e-26	Mitotic oogonia
LOC103379701	5.38823e-30	0.277812	0.281	0.163	1.12706e-25	Mitotic oogonia
LOC103380180	9.45112e-30	0.368657	0.272	0.156	1.97689e-25	Mitotic oogonia
sptssa	1.09634e-29	0.340523	0.27	0.152	2.29322e-25	Mitotic oogonia
fbxl5	1.19969e-29	0.332023	0.255	0.142	2.50939e-25	Mitotic oogonia
LOC103379320	1.26526e-29	0.495477	0.293	0.171	2.64653e-25	Mitotic oogonia
LOC103388117	1.29488e-29	1.39692	0.285	0.166	2.7085e-25	Mitotic oogonia
LOC103392083	2.64811e-29	0.346065	0.273	0.155	5.53905e-25	Mitotic oogonia
LOC103377855	2.77294e-29	0.266978	0.286	0.167	5.80016e-25	Mitotic oogonia
2021-09-03	2.99242e-29	0.300858	0.253	0.141	6.25924e-25	Mitotic oogonia
stx5	3.00669e-29	0.319249	0.261	0.147	6.28909e-25	Mitotic oogonia
c6h11orf58	3.05997e-29	0.319524	0.357	0.229	6.40053e-25	Mitotic oogonia
LOC103393286	5.37034e-29	0.863023	0.448	0.317	1.12331e-24	Mitotic oogonia
mrpl22	9.12609e-29	0.648824	0.422	0.282	1.90891e-24	Mitotic oogonia
eif4e2	9.27604e-29	0.602744	0.264	0.152	1.94027e-24	Mitotic oogonia
retreg3	9.28363e-29	0.453625	0.305	0.186	1.94186e-24	Mitotic oogonia
LOC103389311	9.95564e-29	0.50029	0.276	0.16	2.08242e-24	Mitotic oogonia
ssb	1.29872e-28	0.317764	0.297	0.177	2.71654e-24	Mitotic oogonia
hp1bp3	1.7674e-28	0.498359	0.297	0.18	3.69687e-24	Mitotic oogonia
LOC103388601	6.67766e-28	0.33297	0.254	0.145	1.39677e-23	Mitotic oogonia
vapa	1.01793e-27	1.09399	0.364	0.236	2.1292e-23	Mitotic oogonia
usp7	2.39185e-27	0.518263	0.303	0.186	5.00304e-23	Mitotic oogonia
ube2i	5.72904e-27	0.507865	0.373	0.249	1.19834e-22	Mitotic oogonia
dnaja2	6.15844e-27	1.4418	0.435	0.306	1.28816e-22	Mitotic oogonia
sf3a3	6.43915e-27	0.477049	0.334	0.21	1.34688e-22	Mitotic oogonia
tipin	9.92136e-27	0.472733	0.269	0.158	2.07525e-22	Mitotic oogonia
srsf3	1.04751e-26	0.314167	0.522	0.39	2.19107e-22	Mitotic oogonia
pdzd11	1.26289e-26	0.601011	0.276	0.163	2.64158e-22	Mitotic oogonia
zranb2	2.8984e-26	0.719282	0.373	0.251	6.06258e-22	Mitotic oogonia
lyar	3.3905e-26	0.534326	0.275	0.162	7.0919e-22	Mitotic oogonia
thoc5	3.40836e-26	0.289826	0.253	0.145	7.12927e-22	Mitotic oogonia
ATP6	3.89988e-26	13.0078	0.386	0.504	8.15737e-22	Mitotic oogonia
abcf2	4.12409e-26	0.405968	0.414	0.288	8.62637e-22	Mitotic oogonia
LOC103380169	4.87048e-26	0.343807	0.299	0.182	1.01876e-21	Mitotic oogonia
LOC103385853	5.13858e-26	0.724208	0.378	0.256	1.07484e-21	Mitotic oogonia
LOC103388642	5.65222e-26	2.47431	0.368	0.246	1.18227e-21	Mitotic oogonia
riox2	8.47927e-26	0.278872	0.269	0.158	1.77361e-21	Mitotic oogonia
LOC103387861	1.30955e-25	0.387507	0.278	0.168	2.73919e-21	Mitotic oogonia
LOC103382982	1.56827e-25	0.444207	0.401	0.275	3.28035e-21	Mitotic oogonia
psmd2	1.64175e-25	0.307466	0.282	0.172	3.43405e-21	Mitotic oogonia
nipa2	1.86827e-25	0.453964	0.271	0.163	3.90786e-21	Mitotic oogonia
nmd3	2.3999e-25	0.659423	0.447	0.312	5.01987e-21	Mitotic oogonia
LOC103399253	6.44795e-25	0.279581	0.287	0.175	1.34872e-20	Mitotic oogonia
nifk	1.11657e-24	0.498342	0.324	0.209	2.33553e-20	Mitotic oogonia
rae1	2.87e-24	0.26497	0.307	0.194	6.00317e-20	Mitotic oogonia
LOC103388207	3.54317e-24	0.760516	0.31	0.201	7.41125e-20	Mitotic oogonia
usp14	5.11368e-24	0.294172	0.292	0.18	1.06963e-19	Mitotic oogonia
rad23b	1.77068e-23	0.257677	0.261	0.16	3.70373e-19	Mitotic oogonia
ubr5	1.90677e-23	0.517836	0.27	0.165	3.98839e-19	Mitotic oogonia
LOC103398620	2.28071e-23	0.342971	0.253	0.152	4.77056e-19	Mitotic oogonia
smarcb1	4.44725e-23	0.312218	0.369	0.253	9.3023e-19	Mitotic oogonia
LOC103394064	8.22127e-23	0.915805	0.453	0.337	1.71964e-18	Mitotic oogonia
psmd14	1.82773e-22	0.314009	0.256	0.156	3.82306e-18	Mitotic oogonia
hnrnpm	2.17968e-22	0.376941	0.367	0.251	4.55924e-18	Mitotic oogonia
timm8a	2.57939e-22	0.710458	0.374	0.253	5.39531e-18	Mitotic oogonia
naaa	2.59383e-22	0.257255	0.264	0.16	5.42552e-18	Mitotic oogonia
srp54	3.16541e-22	0.512254	0.33	0.22	6.62109e-18	Mitotic oogonia
sptlc1	4.14117e-22	0.322552	0.262	0.162	8.66209e-18	Mitotic oogonia
caprin1	4.42175e-22	0.288751	0.343	0.231	9.24897e-18	Mitotic oogonia
cct3	6.24717e-22	0.723182	0.521	0.407	1.30672e-17	Mitotic oogonia
bcas2	1.22724e-21	0.721519	0.353	0.24	2.56701e-17	Mitotic oogonia
cdc40	1.46411e-21	0.26419	0.259	0.159	3.06247e-17	Mitotic oogonia
LOC103397827	1.64363e-21	0.708272	0.267	0.164	3.43798e-17	Mitotic oogonia
rab10	2.75115e-21	0.492684	0.339	0.23	5.75458e-17	Mitotic oogonia
c5h19orf12	5.06083e-21	0.26941	0.272	0.171	1.05857e-16	Mitotic oogonia
elp5	1.25244e-20	0.299185	0.297	0.192	2.61973e-16	Mitotic oogonia
ssr1	1.55104e-20	0.428836	0.338	0.234	3.24432e-16	Mitotic oogonia
rcl1	4.38699e-20	0.773092	0.423	0.314	9.17628e-16	Mitotic oogonia
dcun1d5	5.47647e-20	0.349702	0.273	0.174	1.14551e-15	Mitotic oogonia
hexb	5.80149e-20	1.30635	0.277	0.181	1.2135e-15	Mitotic oogonia
selenof	8.98968e-20	0.462959	0.414	0.305	1.88037e-15	Mitotic oogonia
LOC103384378	1.34012e-19	1.14149	0.286	0.184	2.80313e-15	Mitotic oogonia
LOC103386132	2.02124e-19	0.518779	0.322	0.221	4.22783e-15	Mitotic oogonia
lancl1	2.93472e-19	0.556344	0.35	0.244	6.13855e-15	Mitotic oogonia
smndc1	3.38658e-19	1.35882	0.336	0.234	7.08372e-15	Mitotic oogonia
LOC103379158	3.7724e-19	0.36555	0.273	0.176	7.89072e-15	Mitotic oogonia
huwe1	4.79501e-19	2.85292	0.361	0.258	1.00297e-14	Mitotic oogonia
c6hxorf56	1.74119e-18	0.284496	0.282	0.185	3.64205e-14	Mitotic oogonia
LOC103382358	6.60186e-18	0.46527	0.262	0.17	1.38091e-13	Mitotic oogonia
mgme1	7.63874e-18	0.788569	0.258	0.167	1.5978e-13	Mitotic oogonia
psma5	8.01793e-18	0.256454	0.377	0.275	1.67711e-13	Mitotic oogonia
LOC103378749	1.3847e-17	0.369752	0.256	0.167	2.89637e-13	Mitotic oogonia
hdgf	1.46935e-17	0.428412	0.254	0.166	3.07344e-13	Mitotic oogonia
kars	1.97074e-17	2.6532	0.323	0.227	4.12219e-13	Mitotic oogonia
gpatch4	9.06677e-17	1.56749	0.311	0.217	1.8965e-12	Mitotic oogonia
pabpc1	1.19364e-15	1.82899	0.596	0.495	2.49673e-11	Mitotic oogonia
ap3d1	1.36764e-15	0.708176	0.263	0.18	2.8607e-11	Mitotic oogonia
LOC103384347	5.11555e-15	0.499072	0.292	0.206	1.07002e-10	Mitotic oogonia
LOC103391236	6.80792e-15	0.432215	0.338	0.248	1.42401e-10	Mitotic oogonia
atp6ap2	1.57819e-14	0.41445	0.351	0.257	3.3011e-10	Mitotic oogonia
gps2	1.01314e-13	0.329397	0.261	0.182	2.1192e-09	Mitotic oogonia
copg2	1.62538e-13	1.80644	0.315	0.231	3.39981e-09	Mitotic oogonia
pdcl3	2.56629e-13	0.40012	0.252	0.176	5.3679e-09	Mitotic oogonia
LOC103377018	1.23115e-12	0.282025	0.304	0.222	2.5752e-08	Mitotic oogonia
baz1b	2.87648e-12	0.454655	0.284	0.206	6.01673e-08	Mitotic oogonia
ndufv1	1.24725e-11	0.386219	0.352	0.271	2.60887e-07	Mitotic oogonia
st13	2.94261e-11	0.573969	0.28	0.206	6.15506e-07	Mitotic oogonia
syf2	4.14766e-11	4.15105	0.423	0.339	8.67566e-07	Mitotic oogonia
ap2m1	5.3823e-11	0.275099	0.319	0.243	1.12582e-06	Mitotic oogonia
LOC103389096	1.0628e-09	2.59358	0.287	0.213	2.22306e-05	Mitotic oogonia
LOC103389939	1.49005e-09	1.26449	0.271	0.204	3.11674e-05	Mitotic oogonia
LOC103378456	2.3435e-09	0.263862	0.284	0.219	4.9019e-05	Mitotic oogonia
elob	4.11104e-09	0.257172	0.305	0.237	8.59906e-05	Mitotic oogonia
mmadhc	1.32469e-08	0.432003	0.29	0.219	0.000277086	Mitotic oogonia
cdc5l	2.06492e-08	0.474693	0.255	0.196	0.00043192	Mitotic oogonia
LOC103382819	2.28902e-08	0.309749	0.319	0.251	0.000478795	Mitotic oogonia
LOC103381165	2.46704e-08	0.682136	0.27	0.2	0.000516032	Mitotic oogonia
LOC103381975	3.59883e-08	0.799906	0.45	0.384	0.000752768	Mitotic oogonia
phrf1	1.83964e-07	0.48835	0.272	0.216	0.00384797	Mitotic oogonia
nicn1	1.58592e-06	0.883614	0.256	0.202	0.0331726	Mitotic oogonia

## Sheet: Oocyte
Gene	p_val	avg_logFC	pct.1	pct.2	p_val_adj	cluster
rps20	0	Inf	1	0.995	0	oocyte
LOC103379551	0	Inf	1	0.975	0	oocyte
LOC103379620	0	Inf	1	0.993	0	oocyte
LOC103385942	0	Inf	1	0.998	0	oocyte
LOC103388389	0	Inf	1	0.977	0	oocyte
LOC103390914	0	Inf	1	0.997	0	oocyte
LOC103378172	0	229.399	1	0.983	0	oocyte
uba52	0	220.399	0.999	0.96	0	oocyte
LOC103393015	0	212.399	0.999	0.901	0	oocyte
rps25	0	192.448	0.998	0.976	0	oocyte
LOC103399023	0	173.399	0.995	0.797	0	oocyte
rpl10a	0	167.399	0.999	0.963	0	oocyte
LOC103384861	0	159.399	0.989	0.863	0	oocyte
rpl11	0	127.399	1	0.971	0	oocyte
LOC103394423	0	120.116	0.894	0.517	0	oocyte
LOC103397472	0	112.399	0.994	0.896	0	oocyte
zar1	0	95.0861	0.986	0.786	0	oocyte
LOC103396601	0	91.3994	0.993	0.846	0	oocyte
rpl22l1	0	87.3809	0.947	0.706	0	oocyte
LOC103387799	0	80.3994	0.965	0.766	0	oocyte
LOC103386791	0	73.3994	0.917	0.54	0	oocyte
LOC103380452	0	66.1108	0.919	0.489	0	oocyte
magoh	0	64.702	0.949	0.592	0	oocyte
LOC103393642	0	60.3122	0.964	0.765	0	oocyte
LOC103391346	0	40.5952	0.939	0.551	0	oocyte
mrpl42	0	37.0207	0.819	0.326	0	oocyte
lipc	0	35.2764	0.927	0.513	0	oocyte
LOC103382057	0	33.8843	0.613	0.162	0	oocyte
rrh	0	31.6709	0.813	0.369	0	oocyte
LOC103390707	0	31.0439	0.842	0.343	0	oocyte
LOC103395027	0	24.6956	0.873	0.442	0	oocyte
LOC103396379	0	23.1114	0.707	0.216	0	oocyte
LOC103387448	0	15.644	0.769	0.312	0	oocyte
rpl30	1.76612e-307	87.3994	0.994	0.947	3.69419e-303	oocyte
txn	4.98173e-306	63.0853	0.943	0.672	1.04203e-301	oocyte
LOC103392522	3.57914e-300	86.3994	0.999	0.967	7.48649e-296	oocyte
LOC103398810	5.47408e-299	5.35983	0.637	0.187	1.14501e-294	oocyte
LOC103398908	4.51692e-294	41.315	0.899	0.573	9.44804e-290	oocyte
LOC103397941	7.13967e-293	15.4233	0.75	0.31	1.4934e-288	oocyte
rps15a	8.28433e-293	153.713	0.998	0.958	1.73283e-288	oocyte
LOC103382188	1.88207e-292	57.3994	0.994	0.914	3.93673e-288	oocyte
chchd10	1.2442e-290	26.0488	0.809	0.379	2.60249e-286	oocyte
lsm2	1.70921e-290	40.0861	0.926	0.589	3.57516e-286	oocyte
LOC103397057	1.78963e-287	83.3927	0.986	0.875	3.74338e-283	oocyte
eef1b2	1.82355e-286	136.399	0.997	0.975	3.81432e-282	oocyte
pno1	1.26433e-285	14.2285	0.788	0.38	2.6446e-281	oocyte
LOC103379310	1.3822e-283	22.1529	0.784	0.368	2.89116e-279	oocyte
kctd14	6.6791e-283	10.1877	0.653	0.212	1.39707e-278	oocyte
LOC103395539	9.51214e-277	24.0359	0.765	0.343	1.98965e-272	oocyte
ost4	4.22535e-276	50.3919	0.784	0.38	8.83816e-272	oocyte
LOC103381286	1.77838e-274	14.5416	0.65	0.216	3.71984e-270	oocyte
LOC103392072	3.38213e-274	142.399	1	0.989	7.07439e-270	oocyte
rps21	7.40523e-273	103.399	0.978	0.854	1.54895e-268	oocyte
atp5mg	7.29927e-270	37.5259	0.916	0.632	1.52679e-265	oocyte
LOC103398515	8.33358e-270	165.086	0.975	0.691	1.74313e-265	oocyte
LOC103391647	2.71763e-269	43.3991	0.868	0.538	5.68446e-265	oocyte
atp5f1c	1.11474e-268	53.3994	0.889	0.588	2.33171e-264	oocyte
atp5mc3	2.04317e-268	65.4186	0.954	0.73	4.27369e-264	oocyte
rpl36	1.5225e-267	139.399	0.996	0.958	3.18461e-263	oocyte
pcgf1	9.30731e-263	29.2211	0.805	0.424	1.94681e-258	oocyte
LOC103392655	1.39183e-261	59.5449	0.856	0.498	2.91129e-257	oocyte
LOC103381247	7.21132e-261	Inf	1	0.967	1.50839e-256	oocyte
LOC103394271	1.71517e-260	11.0617	0.805	0.441	3.58762e-256	oocyte
LOC103386747	2.53166e-257	22.2847	0.712	0.298	5.29547e-253	oocyte
eif3g	8.8451e-256	32.3605	0.899	0.628	1.85013e-251	oocyte
rpl15	1.95693e-255	139.393	0.994	0.961	4.09331e-251	oocyte
acp5	6.22407e-255	23.4483	0.985	0.817	1.30189e-250	oocyte
LOC103385823	2.29236e-252	122.375	1	0.978	4.79492e-248	oocyte
naca	3.00219e-252	42.3994	0.966	0.859	6.27969e-248	oocyte
mrps6	5.75975e-251	16.0058	0.755	0.351	1.20477e-246	oocyte
LOC103391408	1.32347e-249	29.4061	0.989	0.926	2.76831e-245	oocyte
LOC103394928	2.82325e-249	41.37	0.826	0.478	5.9054e-245	oocyte
rnf7	3.0943e-249	19.4483	0.795	0.418	6.47235e-245	oocyte
rpl32	7.58319e-249	192.398	0.993	0.956	1.58618e-244	oocyte
mrpl55	1.67668e-248	25.7866	0.774	0.38	3.50711e-244	oocyte
psmg4	1.34798e-245	13.051	0.637	0.234	2.81956e-241	oocyte
LOC103387816	3.57988e-245	24.0127	0.829	0.464	7.48804e-241	oocyte
LOC103396600	7.3296e-244	79.3913	0.979	0.786	1.53313e-239	oocyte
rps23	1.60377e-243	42.3994	0.999	0.977	3.3546e-239	oocyte
LOC103385300	1.42962e-242	38.3097	0.932	0.635	2.99034e-238	oocyte
atp5mf	3.51208e-242	33.3986	0.906	0.63	7.34621e-238	oocyte
LOC103381923	4.49857e-242	20.4962	0.873	0.517	9.40965e-238	oocyte
anapc11	5.00837e-242	22.174	0.644	0.242	1.0476e-237	oocyte
LOC103385763	3.15835e-241	37.5529	0.856	0.511	6.60633e-237	oocyte
map1lc3c	6.82161e-240	184.375	0.993	0.868	1.42688e-235	oocyte
LOC107989325	8.60171e-240	19.7969	0.581	0.185	1.79922e-235	oocyte
LOC103385093	1.59227e-239	Inf	1	0.998	3.33054e-235	oocyte
LOC103399979	8.95662e-238	11.7849	0.691	0.297	1.87346e-233	oocyte
LOC103395823	1.14606e-236	18.3055	0.902	0.604	2.39721e-232	oocyte
LOC103386644	2.01339e-236	5.31181	0.579	0.187	4.21141e-232	oocyte
LOC112487376	3.04685e-235	23.025	0.882	0.536	6.37309e-231	oocyte
atp5pf	5.84321e-235	59.0396	0.913	0.657	1.22222e-230	oocyte
rpl27	6.44269e-234	29.1171	0.994	0.953	1.34762e-229	oocyte
rpl31	1.18145e-233	109.402	0.999	0.961	2.47124e-229	oocyte
rpl38	8.20376e-233	89.3994	0.989	0.929	1.71598e-228	oocyte
LOC107988775	1.11186e-231	24.9027	0.823	0.425	2.32567e-227	oocyte
malsu1	1.86758e-229	11.3271	0.724	0.335	3.90641e-225	oocyte
LOC103382333	7.63406e-228	3.16662	0.409	0.082	1.59682e-223	oocyte
rpl29	1.55991e-226	84.0886	0.978	0.863	3.26287e-222	oocyte
rps10	1.90495e-224	65.3994	0.996	0.973	3.98458e-220	oocyte
ndufa2	4.26116e-224	26.5848	0.775	0.415	8.91306e-220	oocyte
LOC103384121	1.27898e-223	23.3994	0.985	0.844	2.67525e-219	oocyte
rps28	1.73016e-223	42.3994	0.986	0.928	3.61898e-219	oocyte
sod2	2.45426e-223	13.7285	0.799	0.432	5.13358e-219	oocyte
LOC103397498	3.18651e-223	21.3994	0.637	0.255	6.66522e-219	oocyte
LOC103388164	2.16907e-221	32.3999	0.956	0.75	4.53704e-217	oocyte
LOC103396071	6.51656e-220	65.3994	0.998	0.933	1.36307e-215	oocyte
LOC103393142	6.87184e-218	8.31878	0.66	0.275	1.43738e-213	oocyte
mrpl34	3.60773e-217	5.65836	0.538	0.168	7.54629e-213	oocyte
LOC103394382	7.17803e-217	8.6778	0.655	0.27	1.50143e-212	oocyte
exosc6	9.09208e-217	4.95342	0.554	0.179	1.90179e-212	oocyte
rbx1	3.10175e-216	10.8275	0.799	0.444	6.48793e-212	oocyte
rpl35a	4.2172e-216	127.399	0.999	0.981	8.82112e-212	oocyte
thoc3	6.2849e-216	6.56904	0.586	0.205	1.31461e-211	oocyte
sec61g	7.07236e-216	57.2708	0.848	0.546	1.47933e-211	oocyte
lyrm9	1.30904e-215	11.1363	0.55	0.175	2.73812e-211	oocyte
LOC103395597	2.96392e-215	23.4709	0.782	0.444	6.19964e-211	oocyte
LOC103394319	6.26088e-215	29.8504	0.839	0.52	1.30959e-210	oocyte
rps2	2.26546e-214	135.399	0.999	0.991	4.73866e-210	oocyte
ndufb2	6.50447e-214	33.4082	0.802	0.478	1.36054e-209	oocyte
ndufs3	1.17324e-213	7.03512	0.667	0.296	2.45407e-209	oocyte
mrpl41	2.08753e-212	6.01662	0.615	0.233	4.36648e-208	oocyte
cfap20	1.32214e-210	5.30062	0.552	0.182	2.76551e-206	oocyte
btf3	2.99684e-210	36.0503	0.966	0.839	6.26848e-206	oocyte
atp5po	7.02421e-210	21.397	0.814	0.494	1.46925e-205	oocyte
hnmt	1.06965e-209	5.34776	0.634	0.25	2.2374e-205	oocyte
LOC103394942	1.9415e-208	12.9122	0.652	0.274	4.06104e-204	oocyte
rps11	4.48083e-207	168.399	1	0.992	9.37256e-203	oocyte
LOC103384726	4.67664e-207	46.0811	0.969	0.772	9.78212e-203	oocyte
LOC103378706	1.71123e-205	55.0925	0.989	0.925	3.57937e-201	oocyte
hmgb2	3.52156e-205	42.3969	0.969	0.812	7.36605e-201	oocyte
pfdn4	4.03513e-205	24.5941	0.764	0.422	8.44028e-201	oocyte
gtf2h5	8.48885e-205	23.6113	0.643	0.281	1.77561e-200	oocyte
rps3	2.64686e-204	17.3994	0.992	0.971	5.53644e-200	oocyte
LOC103390645	2.38399e-202	16.1341	0.576	0.204	4.98659e-198	oocyte
LOC103393785	3.02344e-201	11.4338	0.646	0.269	6.32414e-197	oocyte
ran	1.85109e-200	16.3362	0.908	0.689	3.87193e-196	oocyte
chrac1	2.79681e-198	6.32186	0.512	0.16	5.85008e-194	oocyte
tmem258	1.82478e-197	26.4722	0.851	0.57	3.81689e-193	oocyte
ndufb8	3.26223e-197	12.3151	0.711	0.353	6.8236e-193	oocyte
rpl23a	6.97168e-196	93.4003	1	0.991	1.45827e-191	oocyte
ndufb11	3.57215e-194	8.30343	0.644	0.28	7.47186e-190	oocyte
ndufaf8	4.84276e-194	12.1577	0.496	0.155	1.01296e-189	oocyte
pclaf	7.77805e-194	25.0335	0.905	0.623	1.62693e-189	oocyte
ndufb3	1.00951e-193	12.0191	0.717	0.365	2.1116e-189	oocyte
LOC103386267	1.74673e-193	8.11352	0.596	0.235	3.65364e-189	oocyte
cmc1	2.25491e-193	16.6264	0.679	0.316	4.7166e-189	oocyte
LOC103384214	4.56618e-193	13.3935	0.682	0.323	9.55107e-189	oocyte
polr2e	1.68766e-192	5.30911	0.544	0.192	3.53008e-188	oocyte
dnd1	7.27887e-191	15.404	0.781	0.451	1.52252e-186	oocyte
LOC103399029	9.64465e-191	4.59055	0.472	0.137	2.01737e-186	oocyte
timm9	2.18319e-190	31.4092	0.814	0.516	4.56658e-186	oocyte
ndufa11	1.01453e-189	13.8635	0.628	0.267	2.12208e-185	oocyte
LOC112486625	3.40016e-189	31.6355	0.809	0.484	7.11211e-185	oocyte
rps14	4.46311e-189	31.3994	0.999	0.994	9.33549e-185	oocyte
apopt1	2.74289e-188	2.50645	0.41	0.101	5.73731e-184	oocyte
rpl18	3.04885e-188	13.3994	0.989	0.918	6.37727e-184	oocyte
LOC103394183	4.78802e-188	55.393	0.976	0.776	1.00151e-183	oocyte
cep162	8.15638e-188	5.31839	0.851	0.496	1.70607e-183	oocyte
LOC103397139	1.42431e-187	26.3994	0.98	0.933	2.97924e-183	oocyte
LOC103378601	2.52413e-187	9.31206	0.509	0.167	5.27972e-183	oocyte
nr2c2ap	2.8227e-187	5.12584	0.576	0.22	5.90423e-183	oocyte
med9	3.91851e-187	19.3969	0.742	0.399	8.19635e-183	oocyte
LOC103379633	2.05605e-186	22.0618	0.707	0.358	4.30064e-182	oocyte
ndufs8	3.22996e-186	8.44399	0.669	0.324	6.75612e-182	oocyte
LOC103378038	5.44813e-184	9.20844	0.69	0.327	1.13959e-179	oocyte
ckb	1.5302e-183	31.3826	0.937	0.715	3.20072e-179	oocyte
lamtor5	2.47392e-183	10.4782	0.631	0.274	5.17471e-179	oocyte
LOC103381535	2.85864e-183	20.782	0.724	0.393	5.97941e-179	oocyte
LOC103397984	3.54328e-183	39.3891	0.98	0.866	7.41149e-179	oocyte
LOC103387589	4.9119e-183	6.11652	0.478	0.15	1.02742e-178	oocyte
gpx3	5.89476e-182	20.3496	0.935	0.698	1.23301e-177	oocyte
rpl7a	9.39937e-182	76.3993	0.994	0.964	1.96607e-177	oocyte
LOC103396322	6.94851e-181	19.3768	0.77	0.432	1.45342e-176	oocyte
LOC103396798	7.48814e-180	8.94321	0.793	0.473	1.5663e-175	oocyte
mrps17	7.80087e-180	9.30108	0.624	0.272	1.63171e-175	oocyte
LOC103393019	1.11337e-179	7.8542	0.612	0.267	2.32884e-175	oocyte
ube2c	4.71373e-179	22.0289	0.795	0.484	9.85971e-175	oocyte
commd8	5.40289e-179	8.95753	0.557	0.212	1.13012e-174	oocyte
snrpe	8.31617e-179	15.7798	0.881	0.635	1.73949e-174	oocyte
LOC103379667	9.95803e-179	3.38105	0.395	0.096	2.08292e-174	oocyte
rpl8	2.76753e-178	5.39944	0.994	0.956	5.78883e-174	oocyte
LOC103398060	1.37067e-177	33.0458	0.892	0.584	2.86703e-173	oocyte
thoc7	2.22638e-177	23.0125	0.717	0.387	4.65691e-173	oocyte
LOC103390348	3.13257e-177	8.70332	0.667	0.31	6.5524e-173	oocyte
ppil3	4.37012e-177	4.54677	0.472	0.149	9.14098e-173	oocyte
taf13	1.55921e-176	19.8837	0.753	0.442	3.26139e-172	oocyte
LOC103382361	8.56046e-176	11.0653	0.705	0.355	1.79059e-171	oocyte
LOC103380233	1.4711e-175	1.29593	0.684	0.343	3.0771e-171	oocyte
anapc13	1.57678e-175	2.82168	0.437	0.124	3.29815e-171	oocyte
nup43	3.00089e-173	5.96806	0.601	0.249	6.27697e-169	oocyte
LOC103386948	3.87431e-173	2.67676	0.388	0.097	8.1039e-169	oocyte
LOC103398108	8.22471e-173	20.017	0.707	0.376	1.72036e-168	oocyte
LOC103395122	2.90743e-172	10.0731	0.873	0.629	6.08146e-168	oocyte
LOC103381571	3.67092e-172	6.65286	0.535	0.2	7.67847e-168	oocyte
surf2	1.82547e-171	5.61134	0.596	0.253	3.81835e-167	oocyte
ndufa8	3.62384e-171	5.02781	0.591	0.248	7.57999e-167	oocyte
mrpl49	8.95309e-171	5.4402	0.513	0.183	1.87272e-166	oocyte
pfdn1	9.37993e-171	14.5673	0.771	0.446	1.962e-166	oocyte
vbp1	2.43823e-170	13.1455	0.771	0.47	5.10005e-166	oocyte
LOC103398454	8.94406e-170	15.1446	0.633	0.291	1.87083e-165	oocyte
npc2	1.22758e-169	24.2172	0.931	0.683	2.56772e-165	oocyte
rnaseh2c	2.5426e-169	7.90653	0.578	0.24	5.31835e-165	oocyte
rps8	7.0559e-169	26.4061	0.999	0.993	1.47588e-164	oocyte
eys	1.59134e-168	3.39462	0.497	0.172	3.3286e-164	oocyte
LOC112487477	1.656e-168	5.03854	0.364	0.087	3.46385e-164	oocyte
ndufb4	2.44324e-168	13.638	0.576	0.239	5.11051e-164	oocyte
LOC103387463	7.99444e-168	5.88862	0.524	0.195	1.6722e-163	oocyte
LOC112488455	1.10718e-167	5.09071	0.559	0.223	2.31589e-163	oocyte
sf3b5	2.37316e-167	19.0161	0.804	0.504	4.96394e-163	oocyte
mrpl21	3.729e-166	10.8256	0.698	0.36	7.79994e-162	oocyte
tomm7	3.97091e-166	12.9959	0.627	0.289	8.30595e-162	oocyte
ndufb6	5.90845e-166	17.5771	0.646	0.311	1.23587e-161	oocyte
LOC112486955	8.3662e-166	1.10456	0.698	0.371	1.74996e-161	oocyte
LOC103397768	3.68064e-165	34.4117	0.891	0.655	7.6988e-161	oocyte
LOC103389615	1.88731e-164	4.61807	0.432	0.13	3.94768e-160	oocyte
rpl37a	3.71607e-164	112.448	0.995	0.977	7.77291e-160	oocyte
mrpl35	4.11099e-164	3.92913	0.575	0.234	8.59895e-160	oocyte
alg13	5.64777e-163	2.81581	0.394	0.106	1.18134e-158	oocyte
mrps22	4.90565e-162	7.68679	0.61	0.273	1.02612e-157	oocyte
atp5pd	1.89149e-161	13.4558	0.777	0.488	3.95642e-157	oocyte
LOC103392030	3.34463e-161	98.4184	0.994	0.939	6.99597e-157	oocyte
cenpm	5.68454e-161	3.83597	0.521	0.197	1.18903e-156	oocyte
brix1	1.7396e-160	5.46532	0.714	0.386	3.63872e-156	oocyte
mien1	4.30386e-160	6.00578	0.558	0.229	9.00239e-156	oocyte
rpl27a	4.82504e-160	35.4062	0.989	0.94	1.00925e-155	oocyte
atg12	7.064e-160	10.9086	0.553	0.228	1.47758e-155	oocyte
lyplal1	1.12364e-159	2.38916	0.449	0.143	2.35032e-155	oocyte
LOC103387506	1.17445e-159	2.8711	0.378	0.099	2.4566e-155	oocyte
mrps21	1.57903e-159	15.0936	0.653	0.321	3.30287e-155	oocyte
nme6	1.83105e-159	2.58315	0.613	0.277	3.83001e-155	oocyte
rplp1	2.02249e-159	175.086	0.993	0.98	4.23043e-155	oocyte
LOC103394264	3.18344e-157	99.0861	0.986	0.88	6.65881e-153	oocyte
mrps18c	4.21513e-157	7.41511	0.623	0.294	8.81678e-153	oocyte
mrps36	1.73277e-155	6.57571	0.483	0.173	3.62444e-151	oocyte
atp5md	4.21215e-155	19.1599	0.747	0.443	8.81055e-151	oocyte
gemin7	6.45122e-155	7.2985	0.556	0.237	1.3494e-150	oocyte
smim7	2.06481e-154	5.35473	0.449	0.151	4.31896e-150	oocyte
cinp	3.13662e-154	6.03466	0.525	0.209	6.56088e-150	oocyte
rps27a	3.43968e-154	44.3994	0.999	0.992	7.19477e-150	oocyte
LOC112488380	1.7997e-153	11.338	0.647	0.328	3.76444e-149	oocyte
gpnmb	1.19713e-152	4.54628	0.463	0.158	2.50404e-148	oocyte
LOC103380994	2.05234e-152	7.58226	0.525	0.206	4.29288e-148	oocyte
dpm2	2.11822e-152	8.09739	0.514	0.201	4.43069e-148	oocyte
LOC103398719	2.9439e-152	30.3909	0.795	0.489	6.15775e-148	oocyte
nop10	3.48226e-152	21.0169	0.71	0.399	7.28384e-148	oocyte
lsm1	4.26856e-152	3.66778	0.469	0.166	8.92855e-148	oocyte
LOC103386363	8.68781e-152	3.28405	0.435	0.139	1.81723e-147	oocyte
LOC103381483	1.03067e-151	1.43682	0.343	0.083	2.15586e-147	oocyte
pam16	3.09257e-151	12.3192	0.551	0.235	6.46873e-147	oocyte
uchl1	9.94061e-151	6.50448	0.719	0.407	2.07928e-146	oocyte
rpl18a	1.8777e-150	0.399394	0.99	0.946	3.92758e-146	oocyte
atp6v1f	3.65906e-150	11.803	0.684	0.373	7.65365e-146	oocyte
brk1	1.18869e-149	8.66504	0.632	0.307	2.48638e-145	oocyte
c13h8orf88	1.37818e-149	4.74505	0.571	0.251	2.88274e-145	oocyte
LOC103386933	9.80141e-149	6.38718	0.666	0.338	2.05016e-144	oocyte
atp5f1d	1.09316e-147	7.86886	0.755	0.464	2.28656e-143	oocyte
polr2j	1.36216e-147	11.5124	0.608	0.292	2.84924e-143	oocyte
mkrn2	3.13413e-147	2.22473	0.534	0.212	6.55566e-143	oocyte
LOC103386861	3.40224e-147	1.73131	0.346	0.087	7.11646e-143	oocyte
LOC103391990	1.11088e-146	28.3994	0.993	0.885	2.32364e-142	oocyte
LOC103395053	2.29941e-146	21.3822	0.987	0.95	4.80967e-142	oocyte
txnl4b	2.94432e-146	6.17398	0.47	0.171	6.15864e-142	oocyte
c2h19orf25	5.44799e-146	5.51962	0.503	0.195	1.13956e-141	oocyte
LOC103388963	1.32588e-145	49.388	0.976	0.91	2.77333e-141	oocyte
trappc4	1.33148e-145	6.13488	0.54	0.234	2.78505e-141	oocyte
mrps23	1.43537e-145	1.76029	0.375	0.105	3.00237e-141	oocyte
sdhaf2	2.03877e-145	3.07396	0.381	0.11	4.26449e-141	oocyte
dhfr	2.19867e-145	1.86033	0.31	0.07	4.59895e-141	oocyte
LOC103380118	3.93681e-145	8.56772	0.697	0.382	8.23463e-141	oocyte
pomp	3.9768e-145	9.59899	0.686	0.378	8.31827e-141	oocyte
ndufs6	7.11776e-145	8.86635	0.62	0.3	1.48882e-140	oocyte
dnajc4	9.13466e-145	2.79008	0.41	0.128	1.9107e-140	oocyte
tbca	1.67941e-144	23.4539	0.711	0.42	3.51282e-140	oocyte
atox1	3.01312e-144	3.76098	0.542	0.227	6.30255e-140	oocyte
sap18	3.41124e-144	10.7268	0.669	0.355	7.13528e-140	oocyte
LOC103394721	5.04325e-144	8.1783	0.525	0.216	1.0549e-139	oocyte
LOC103388321	5.33986e-144	4.40345	0.405	0.125	1.11694e-139	oocyte
LOC112487237	7.7429e-144	1.6062	0.38	0.11	1.61958e-139	oocyte
glod5	1.40924e-143	1.6446	0.358	0.097	2.94771e-139	oocyte
LOC103394567	2.2403e-142	48.3994	0.998	0.973	4.68603e-138	oocyte
rps12	1.1154e-141	28.3994	0.993	0.955	2.33309e-137	oocyte
eef1g	1.21632e-141	27.4455	0.987	0.938	2.54417e-137	oocyte
LOC103388692	1.30859e-141	28.1386	0.658	0.348	2.73719e-137	oocyte
mrpl10	4.71826e-141	2.95705	0.506	0.202	9.86918e-137	oocyte
grpel1	5.79477e-141	4.30401	0.529	0.221	1.21209e-136	oocyte
mrpl15	1.90668e-140	3.18871	0.581	0.268	3.98821e-136	oocyte
LOC103380775	6.51591e-140	5.48589	0.409	0.131	1.36293e-135	oocyte
LOC103386286	6.96839e-140	4.99479	0.597	0.28	1.45758e-135	oocyte
ccnb1ip1	1.57086e-139	4.27458	0.667	0.364	3.28578e-135	oocyte
rpl10	2.27513e-139	59.3969	0.992	0.963	4.75888e-135	oocyte
LOC103391596	6.89429e-139	4.83207	0.408	0.132	1.44208e-134	oocyte
LOC103390585	1.21311e-138	79.3993	0.996	0.977	2.53747e-134	oocyte
LOC103399337	1.28225e-138	1.04539	0.342	0.09	2.68208e-134	oocyte
LOC103381510	3.92078e-138	8.09016	0.783	0.522	8.20109e-134	oocyte
zcchc4	7.42105e-138	3.53574	0.596	0.287	1.55226e-133	oocyte
lsm6	9.74662e-138	17.7506	0.651	0.355	2.0387e-133	oocyte
dpy30	1.82585e-137	7.90237	0.558	0.251	3.81913e-133	oocyte
nmd3	6.30535e-137	1.74157	0.601	0.284	1.31889e-132	oocyte
LOC103387412	6.87111e-137	13.4439	0.796	0.552	1.43723e-132	oocyte
ccdc58	7.10014e-137	3.27425	0.464	0.173	1.48514e-132	oocyte
LOC103397138	1.2875e-136	14.6038	0.785	0.5	2.69306e-132	oocyte
dut	1.67372e-136	13.3236	0.771	0.479	3.50092e-132	oocyte
c6h12orf73	5.31532e-136	7.96593	0.435	0.154	1.1118e-131	oocyte
anapc10	1.44312e-135	4.78572	0.562	0.259	3.01858e-131	oocyte
LOC103390129	2.35073e-135	15.2843	0.715	0.436	4.91702e-131	oocyte
LOC103394715	2.83715e-135	20.4158	0.538	0.243	5.93447e-131	oocyte
mrpl40	3.46418e-135	2.07201	0.396	0.126	7.24602e-131	oocyte
mrpl9	1.66145e-134	3.55414	0.513	0.216	3.47527e-130	oocyte
LOC103392216	1.72597e-134	9.70631	0.929	0.748	3.61021e-130	oocyte
eif3k	4.27333e-134	9.42037	0.761	0.513	8.93853e-130	oocyte
LOC103393915	4.76075e-134	3.18429	0.61	0.309	9.95806e-130	oocyte
LOC103394247	6.88954e-134	7.80224	0.397	0.13	1.44108e-129	oocyte
exosc4	1.9603e-133	2.39153	0.615	0.304	4.10035e-129	oocyte
ndufa7	2.84659e-133	3.25699	0.573	0.268	5.95421e-129	oocyte
nsmce1	4.31387e-133	3.46107	0.47	0.178	9.02331e-129	oocyte
med28	6.96783e-133	3.60218	0.449	0.163	1.45746e-128	oocyte
mrpl58	5.40159e-132	1.955	0.311	0.078	1.12985e-127	oocyte
smim20	6.03955e-132	8.94812	0.498	0.205	1.26329e-127	oocyte
LOC103384127	6.64999e-132	48.9735	0.872	0.639	1.39098e-127	oocyte
srp14	1.7105e-131	3.50136	0.626	0.323	3.57786e-127	oocyte
mrps10	2.66805e-131	2.75579	0.442	0.164	5.58077e-127	oocyte
eif2b2	4.10383e-131	4.16724	0.57	0.272	8.58398e-127	oocyte
LOC103383409	4.47645e-131	3.52973	0.488	0.198	9.36338e-127	oocyte
LOC103395804	4.54604e-131	1.15723	0.275	0.059	9.50895e-127	oocyte
cdk1	7.94074e-131	2.74293	0.539	0.233	1.66097e-126	oocyte
LOC103398248	1.59336e-130	5.67589	0.483	0.191	3.33282e-126	oocyte
LOC103380027	1.02862e-129	1.8839	0.347	0.099	2.15156e-125	oocyte
LOC103391219	1.45788e-129	11.5145	0.655	0.365	3.04945e-125	oocyte
pbdc1	1.76894e-129	6.85795	0.584	0.293	3.70008e-125	oocyte
LOC103389113	2.01829e-129	6.06982	0.536	0.246	4.22165e-125	oocyte
pfdn5	2.05791e-129	7.74444	0.515	0.227	4.30453e-125	oocyte
LOC103385218	6.55134e-129	16.8722	0.852	0.568	1.37034e-124	oocyte
slirp	1.99463e-128	8.99453	0.638	0.348	4.17217e-124	oocyte
rpl34	3.03689e-128	61.3994	0.989	0.952	6.35227e-124	oocyte
LOC103396417	3.72015e-128	3.57446	0.464	0.181	7.78144e-124	oocyte
psmd6	1.01951e-127	3.31255	0.539	0.243	2.1325e-123	oocyte
LOC103396400	1.13309e-126	20.3984	0.833	0.636	2.37008e-122	oocyte
psmd13	2.17427e-126	8.48378	0.681	0.391	4.54793e-122	oocyte
mrpl43	2.71211e-126	3.50033	0.527	0.233	5.67292e-122	oocyte
LOC103381165	4.74891e-126	1.64803	0.436	0.164	9.9333e-122	oocyte
pigp	5.88817e-126	1.78304	0.275	0.063	1.23163e-121	oocyte
eif3h	1.03303e-125	7.51066	0.757	0.512	2.16078e-121	oocyte
mrps16	2.1432e-125	2.17991	0.43	0.156	4.48294e-121	oocyte
LOC103383647	2.54012e-125	4.29143	0.801	0.569	5.31317e-121	oocyte
pole4	9.17895e-125	5.95986	0.65	0.341	1.91996e-120	oocyte
med29	1.26879e-124	2.21195	0.455	0.178	2.65394e-120	oocyte
ndufs7	1.6421e-124	5.11399	0.658	0.369	3.43479e-120	oocyte
LOC103397890	7.20056e-124	2.16433	0.39	0.13	1.50614e-119	oocyte
mpc1	1.21578e-123	4.78307	0.496	0.212	2.54304e-119	oocyte
mrm2	1.21954e-123	1.36873	0.286	0.069	2.5509e-119	oocyte
LOC103376954	1.92133e-123	6.30404	0.532	0.24	4.01885e-119	oocyte
LOC103379450	1.95e-123	3.57866	0.471	0.186	4.07882e-119	oocyte
ndufv2	2.22407e-123	5.58672	0.439	0.167	4.65208e-119	oocyte
LOC103398092	2.90864e-123	14.1137	0.739	0.471	6.08401e-119	oocyte
LOC107988156	3.05152e-123	1.46243	0.364	0.114	6.38287e-119	oocyte
esd	3.92444e-123	10.0229	0.463	0.186	8.20875e-119	oocyte
bola3	7.3615e-123	3.65962	0.483	0.204	1.53981e-118	oocyte
LOC103383579	8.63338e-123	2.5539	0.527	0.236	1.80584e-118	oocyte
mrpl14	1.39189e-122	4.21713	0.534	0.25	2.91141e-118	oocyte
mcts1	1.76775e-122	10.6945	0.542	0.251	3.69759e-118	oocyte
meiob	7.59499e-122	2.57018	0.464	0.182	1.58864e-117	oocyte
mterf3	2.72029e-121	1.8856	0.405	0.142	5.69004e-117	oocyte
LOC103380202	3.8441e-121	2.8948	0.309	0.084	8.04069e-117	oocyte
med10	4.91066e-121	4.22866	0.501	0.216	1.02716e-116	oocyte
LOC103395820	1.26094e-120	3.17169	0.421	0.155	2.63751e-116	oocyte
mrps24	1.60845e-120	5.0675	0.449	0.175	3.3644e-116	oocyte
LOC103385281	1.67977e-119	4.31122	0.59	0.297	3.51357e-115	oocyte
LOC103390692	3.9883e-119	2.32906	0.38	0.128	8.34232e-115	oocyte
LOC103382292	4.94273e-119	5.85376	0.425	0.161	1.03387e-114	oocyte
c2h19orf70	1.01852e-118	9.16328	0.608	0.327	2.13045e-114	oocyte
LOC103393126	1.47873e-118	9.02829	0.48	0.203	3.09306e-114	oocyte
pts	3.50822e-118	3.62902	0.338	0.102	7.33815e-114	oocyte
LOC103381313	5.17626e-118	13.4072	0.757	0.521	1.08272e-113	oocyte
lsm5	7.03849e-118	14.3501	0.599	0.331	1.47224e-113	oocyte
c8h8orf59	1.45956e-117	6.22204	0.447	0.18	3.05296e-113	oocyte
rpl37	1.48191e-117	64.3994	0.995	0.97	3.09971e-113	oocyte
tmem126a	3.07008e-117	3.25427	0.395	0.139	6.42169e-113	oocyte
ndufa5	6.2243e-117	12.5562	0.622	0.334	1.30194e-112	oocyte
fmc1	1.09736e-116	4.50754	0.496	0.22	2.29535e-112	oocyte
LOC103398650	1.13827e-116	1.98765	0.53	0.25	2.38092e-112	oocyte
LOC103393248	2.97857e-116	2.22391	0.46	0.189	6.23028e-112	oocyte
phf5a	1.32545e-115	14.1452	0.732	0.464	2.77244e-111	oocyte
LOC103380918	1.70022e-115	10.5263	0.992	0.882	3.55636e-111	oocyte
mrps31	2.02573e-115	2.72132	0.48	0.207	4.23723e-111	oocyte
eif3f	4.97979e-115	5.32786	0.845	0.664	1.04162e-110	oocyte
med20	6.01198e-115	2.92561	0.417	0.159	1.25753e-110	oocyte
bud23	1.1295e-114	3.69921	0.52	0.233	2.36257e-110	oocyte
LOC112488625	2.90487e-114	13.0385	0.532	0.255	6.07612e-110	oocyte
asmt	7.03111e-114	3.42978	0.432	0.17	1.4707e-109	oocyte
psmc6	1.22264e-113	5.46597	0.622	0.34	2.5574e-109	oocyte
pmpcb	1.39984e-113	3.14272	0.561	0.281	2.92804e-109	oocyte
LOC103380482	1.66089e-113	3.15598	0.53	0.253	3.47408e-109	oocyte
rpl9	1.90537e-113	18.0861	0.986	0.935	3.98546e-109	oocyte
nip7	2.63113e-113	3.44351	0.529	0.254	5.50354e-109	oocyte
LOC103384208	4.36938e-113	1.43055	0.267	0.066	9.13943e-109	oocyte
pttg1	8.71064e-113	10.6918	0.918	0.701	1.822e-108	oocyte
snrpd1	1.58467e-112	20.0855	0.927	0.754	3.31465e-108	oocyte
denr	2.22385e-112	3.20804	0.562	0.284	4.65162e-108	oocyte
npm3	4.2715e-112	3.73437	0.54	0.254	8.9347e-108	oocyte
LOC103395357	1.02e-111	1.0572	0.29	0.078	2.13353e-107	oocyte
atp5pb	1.23171e-111	13.9732	0.713	0.462	2.57638e-107	oocyte
rbks	1.80758e-111	2.85372	0.383	0.137	3.78091e-107	oocyte
LOC103381158	2.4896e-111	8.3841	0.366	0.127	5.20749e-107	oocyte
tor3a	7.87578e-111	4.12972	0.652	0.377	1.64738e-106	oocyte
wdr83os	8.18785e-111	2.92515	0.629	0.349	1.71265e-106	oocyte
emc10	8.78107e-111	6.16381	0.564	0.291	1.83674e-106	oocyte
LOC103389754	9.33039e-111	13.6521	0.762	0.515	1.95164e-106	oocyte
LOC103387536	1.28634e-110	2.58228	0.38	0.136	2.69064e-106	oocyte
trappc2l	1.60802e-110	4.49814	0.472	0.207	3.36349e-106	oocyte
pfdn6	2.41115e-110	7.08415	0.493	0.227	5.0434e-106	oocyte
LOC103398432	6.2188e-110	5.85773	0.625	0.356	1.30079e-105	oocyte
rpl13	8.55663e-110	29.3993	0.98	0.933	1.78979e-105	oocyte
c9h19orf53	6.4676e-109	7.79334	0.52	0.251	1.35283e-104	oocyte
LOC103389373	6.57101e-109	3.28075	0.445	0.183	1.37446e-104	oocyte
wdr82	9.92519e-109	3.11387	0.552	0.281	2.07605e-104	oocyte
sys1	3.58055e-108	2.38949	0.374	0.132	7.48944e-104	oocyte
ncbp2_as2	8.88139e-108	2.46031	0.472	0.206	1.85772e-103	oocyte
snrnp27	1.00536e-107	2.56982	0.461	0.202	2.1029e-103	oocyte
rnaseh2a	1.08073e-107	2.23346	0.398	0.15	2.26056e-103	oocyte
polr3k	1.08376e-107	3.66787	0.432	0.175	2.26691e-103	oocyte
ndufa1	1.66348e-107	12.4841	0.608	0.345	3.47951e-103	oocyte
LOC103382224	1.71099e-107	3.12816	0.485	0.22	3.57888e-103	oocyte
ngdn	2.87302e-107	3.44851	0.605	0.328	6.0095e-103	oocyte
LOC103396684	3.85224e-107	1.5157	0.329	0.105	8.05773e-103	oocyte
mrps5	1.22211e-106	2.38569	0.455	0.198	2.55628e-102	oocyte
LOC103379554	1.57976e-106	11.4185	0.94	0.779	3.30439e-102	oocyte
LOC103379987	2.15199e-106	1.00515	0.293	0.083	4.50131e-102	oocyte
mrpl51	3.74676e-106	9.52335	0.657	0.405	7.83711e-102	oocyte
polr2h	4.2511e-106	4.98358	0.527	0.255	8.89202e-102	oocyte
rrp7a	8.68978e-106	4.26872	0.415	0.165	1.81764e-101	oocyte
dynlt1	1.49149e-105	3.60485	0.456	0.198	3.11976e-101	oocyte
spcs3	1.75244e-105	3.88412	0.593	0.326	3.66558e-101	oocyte
dmac2	1.75745e-105	6.98662	0.475	0.211	3.67607e-101	oocyte
rps3a	2.61811e-105	16.3994	0.98	0.951	5.4763e-101	oocyte
LOC103396037	2.6944e-105	5.6112	0.611	0.34	5.63588e-101	oocyte
ndufa9	3.25618e-105	1.7299	0.454	0.196	6.81096e-101	oocyte
acp1	1.02376e-104	5.26459	0.406	0.159	2.14139e-100	oocyte
fbxo8	1.06372e-104	1.47113	0.426	0.171	2.22499e-100	oocyte
arl6	1.15847e-104	1.50914	0.358	0.124	2.42317e-100	oocyte
oxtr	1.52199e-104	2.68295	0.269	0.071	3.18355e-100	oocyte
LOC103378511	5.44096e-104	0.974978	0.296	0.087	1.13808e-99	oocyte
LOC103394067	5.71919e-104	3.73468	0.602	0.33	1.19628e-99	oocyte
nsa2	6.20869e-104	19.4658	0.793	0.602	1.29867e-99	oocyte
LOC103379161	1.33779e-103	9.37761	0.687	0.445	2.79826e-99	oocyte
hsd17b10	2.4765e-103	4.19307	0.49	0.228	5.18009e-99	oocyte
cnep1r1	2.7246e-103	6.14056	0.584	0.314	5.69904e-99	oocyte
LOC103388680	3.87403e-103	11.3193	0.774	0.567	8.10331e-99	oocyte
LOC103379798	4.55163e-103	4.34457	0.731	0.464	9.52064e-99	oocyte
lin52	5.1263e-103	7.14617	0.586	0.326	1.07227e-98	oocyte
psmg1	5.18036e-103	2.96806	0.435	0.185	1.08358e-98	oocyte
snapc3	7.07758e-103	1.14557	0.338	0.112	1.48042e-98	oocyte
atpaf2	1.01647e-102	3.44326	0.445	0.193	2.12614e-98	oocyte
nudt21	1.01954e-102	2.95309	0.504	0.246	2.13256e-98	oocyte
LOC103383945	2.73534e-102	13.286	0.895	0.747	5.7215e-98	oocyte
LOC103397351	3.74419e-102	1.41981	0.331	0.108	7.83172e-98	oocyte
mrps28	7.3531e-102	6.04718	0.496	0.236	1.53805e-97	oocyte
LOC103381172	7.79375e-102	5.68347	0.549	0.274	1.63022e-97	oocyte
rpl21	8.45337e-102	20.3994	0.986	0.956	1.76819e-97	oocyte
rfc3	1.05506e-101	2.87966	0.412	0.166	2.20687e-97	oocyte
mrpl57	2.09454e-101	7.53627	0.569	0.31	4.38116e-97	oocyte
pex10	2.96395e-101	1.34964	0.321	0.103	6.19969e-97	oocyte
LOC103380231	3.40603e-101	1.55375	0.312	0.099	7.1244e-97	oocyte
survivin	3.47907e-101	2.72035	0.779	0.529	7.27717e-97	oocyte
LOC103399259	8.21014e-101	2.52885	0.283	0.082	1.71732e-96	oocyte
mcee	1.9281e-100	3.27602	0.436	0.188	4.03301e-96	oocyte
LOC103394647	2.4876e-100	3.02433	0.501	0.238	5.20331e-96	oocyte
chchd1	1.15054e-99	5.99575	0.468	0.211	2.40658e-95	oocyte
LOC107988871	1.22015e-99	1.3704	0.315	0.1	2.5522e-95	oocyte
ndufb5	1.93303e-99	1.95099	0.6	0.346	4.04332e-95	oocyte
LOC103379709	5.89585e-99	64.3994	0.976	0.962	1.23323e-94	oocyte
etfbkmt	8.04973e-99	2.803	0.415	0.171	1.68376e-94	oocyte
polr2i	1.01601e-98	2.42299	0.352	0.126	2.12519e-94	oocyte
acot13	2.40291e-98	2.10074	0.384	0.149	5.02617e-94	oocyte
ufc1	5.82731e-98	2.13248	0.392	0.153	1.2189e-93	oocyte
copz1	6.98668e-98	3.58028	0.47	0.214	1.4614e-93	oocyte
cidec	1.38054e-97	4.15672	0.746	0.499	2.88769e-93	oocyte
LOC103397484	1.77643e-97	2.10249	0.347	0.124	3.71575e-93	oocyte
cct4	1.83645e-97	8.70562	0.729	0.514	3.8413e-93	oocyte
trappc5	3.36875e-97	2.45842	0.409	0.169	7.04642e-93	oocyte
mrpl47	4.39705e-97	2.12674	0.425	0.179	9.19732e-93	oocyte
LOC103383738	4.66933e-97	2.52325	0.411	0.172	9.76685e-93	oocyte
LOC103377013	5.22933e-97	3.37604	0.459	0.21	1.09382e-92	oocyte
phb	7.13416e-97	4.75454	0.617	0.362	1.49225e-92	oocyte
ndufa6	1.19276e-96	6.84543	0.529	0.27	2.49489e-92	oocyte
dnpep	4.07175e-96	1.75203	0.394	0.156	8.51688e-92	oocyte
rnls	5.53218e-96	1.25504	0.357	0.132	1.15717e-91	oocyte
psma6	6.69672e-96	2.74784	0.574	0.32	1.40075e-91	oocyte
mrpl22	7.14882e-96	1.65393	0.524	0.267	1.49532e-91	oocyte
LOC103376670	1.00209e-95	8.86578	0.525	0.274	2.09608e-91	oocyte
eif4a1	1.0081e-95	9.05334	0.755	0.532	2.10865e-91	oocyte
LOC103387892	1.18841e-95	11.8269	0.705	0.461	2.48581e-91	oocyte
timm8a	3.09726e-95	1.60355	0.486	0.234	6.47853e-91	oocyte
wdr12	3.12697e-95	2.6436	0.501	0.246	6.54068e-91	oocyte
cuta	9.93916e-95	2.19266	0.367	0.143	2.07897e-90	oocyte
LOC103386647	1.20012e-94	43.0714	0.941	0.842	2.51029e-90	oocyte
orc4	1.47013e-94	2.59444	0.475	0.225	3.07506e-90	oocyte
ajap1	1.98639e-94	5.22537	0.361	0.138	4.15492e-90	oocyte
prim1	2.14824e-94	0.909417	0.356	0.13	4.49347e-90	oocyte
mrpl32	4.03499e-94	2.60445	0.409	0.173	8.43999e-90	oocyte
LOC112487980	5.06376e-94	2.61289	0.413	0.175	1.05919e-89	oocyte
atp5f1e	5.30711e-94	29.3781	0.835	0.666	1.11009e-89	oocyte
LOC103385329	6.63445e-94	4.37888	0.369	0.144	1.38773e-89	oocyte
LOC103393207	8.71739e-94	2.55338	0.435	0.19	1.82342e-89	oocyte
ptrh2	2.44268e-93	3.64731	0.364	0.139	5.10935e-89	oocyte
taf10	2.55632e-93	3.57199	0.443	0.197	5.34705e-89	oocyte
rps7	3.21085e-93	1.39939	0.996	0.987	6.71613e-89	oocyte
LOC103394644	6.97757e-93	22.4772	0.828	0.694	1.4595e-88	oocyte
cct2	7.84493e-93	10.3194	0.844	0.669	1.64092e-88	oocyte
mrps34	8.86143e-93	1.99466	0.458	0.212	1.85354e-88	oocyte
haus1	1.31472e-92	2.09563	0.309	0.103	2.74999e-88	oocyte
LOC103385362	1.37535e-92	1.28232	0.302	0.099	2.87682e-88	oocyte
rfc4	2.43229e-92	3.60997	0.488	0.237	5.08761e-88	oocyte
exosc5	2.49416e-92	3.46593	0.468	0.22	5.21704e-88	oocyte
LOC103398243	3.11599e-92	2.74572	0.425	0.188	6.51772e-88	oocyte
chchd2	1.02791e-91	2.71477	0.513	0.26	2.15009e-87	oocyte
LOC103387027	1.2008e-91	1.68045	0.252	0.07	2.51172e-87	oocyte
LOC103390969	1.66689e-91	4.95224	0.467	0.223	3.48664e-87	oocyte
fuom	3.76625e-91	1.17725	0.27	0.081	7.87786e-87	oocyte
fam206a	5.25382e-91	2.3441	0.402	0.166	1.09894e-86	oocyte
ndufb9	6.76892e-91	8.92027	0.657	0.422	1.41586e-86	oocyte
ndufb1	1.06988e-90	3.50208	0.468	0.224	2.23786e-86	oocyte
mrpl48	1.15074e-90	2.48314	0.546	0.292	2.407e-86	oocyte
gins3	2.74706e-90	4.37794	0.516	0.259	5.74602e-86	oocyte
LOC103384202	6.11651e-90	1.36802	0.371	0.147	1.27939e-85	oocyte
siva1	9.14227e-90	6.12922	0.769	0.535	1.91229e-85	oocyte
minos1	1.01946e-89	9.69357	0.46	0.22	2.1324e-85	oocyte
polr2g	4.25724e-89	6.07822	0.378	0.153	8.90487e-85	oocyte
LOC103384378	6.19993e-89	0.926251	0.395	0.164	1.29684e-84	oocyte
snrpg	8.7637e-89	8.63378	0.693	0.454	1.8331e-84	oocyte
LOC103396193	5.45331e-88	0.78129	0.265	0.079	1.14067e-83	oocyte
LOC103397380	6.59581e-88	3.29932	0.438	0.201	1.37965e-83	oocyte
dscc1	7.34852e-88	2.62142	0.342	0.127	1.53709e-83	oocyte
LOC103392833	1.24043e-87	2.13509	0.624	0.369	2.59461e-83	oocyte
psmg3	1.38385e-87	1.68607	0.397	0.169	2.8946e-83	oocyte
lrrc20	1.63127e-87	3.6924	0.33	0.12	3.41213e-83	oocyte
LOC103398328	2.20623e-87	1.96726	0.321	0.115	4.61477e-83	oocyte
pdrg1	3.22665e-87	1.33566	0.304	0.105	6.74917e-83	oocyte
anapc15	3.24403e-87	1.04627	0.274	0.085	6.78555e-83	oocyte
ing1	3.29073e-87	2.68215	0.309	0.108	6.88322e-83	oocyte
exosc3	4.084e-87	2.09204	0.556	0.309	8.5425e-83	oocyte
rpl39	2.77867e-86	46.3994	0.971	0.937	5.81214e-82	oocyte
ccdc59	6.01291e-86	2.30311	0.409	0.182	1.25772e-81	oocyte
rpl12	8.81554e-86	57.3994	1	0.995	1.84395e-81	oocyte
oraov1	1.21929e-85	1.28904	0.283	0.092	2.55038e-81	oocyte
LOC103381852	1.42521e-85	0.932939	0.251	0.073	2.9811e-81	oocyte
LOC103385948	1.08409e-84	3.2179	0.473	0.238	2.2676e-80	oocyte
medag	1.22348e-84	2.82286	0.352	0.138	2.55915e-80	oocyte
mzt1	1.30333e-84	4.27948	0.387	0.166	2.72617e-80	oocyte
snrpd3	2.03908e-84	8.04662	0.681	0.462	4.26514e-80	oocyte
pold2	3.25765e-84	2.04779	0.435	0.204	6.81404e-80	oocyte
med7	4.11602e-84	2.59692	0.426	0.197	8.60948e-80	oocyte
mrpl24	7.89244e-84	1.1852	0.36	0.145	1.65086e-79	oocyte
mrps33	9.837e-84	4.00195	0.463	0.229	2.0576e-79	oocyte
LOC103396390	1.22415e-83	33.5175	0.809	0.609	2.56055e-79	oocyte
LOC103391588	1.63266e-83	1.87593	0.338	0.13	3.41504e-79	oocyte
cenpl	1.678e-83	0.892662	0.324	0.12	3.50988e-79	oocyte
LOC103381709	2.15504e-83	2.53641	0.911	0.794	4.5077e-79	oocyte
mrpl54	2.17531e-83	2.29486	0.368	0.151	4.5501e-79	oocyte
uchl3	2.65827e-83	1.60772	0.359	0.145	5.5603e-79	oocyte
gng5	4.87341e-83	3.44112	0.387	0.168	1.01937e-78	oocyte
tyms	6.09307e-83	2.21724	0.47	0.23	1.27449e-78	oocyte
rpl7l1	9.36303e-83	5.36385	0.572	0.328	1.95846e-78	oocyte
tmem44	1.152e-82	4.09631	0.432	0.2	2.40965e-78	oocyte
smim19	1.39519e-82	2.79239	0.443	0.216	2.91831e-78	oocyte
LOC103383893	2.27597e-82	2.21822	0.482	0.241	4.76064e-78	oocyte
nxt2	3.02749e-82	2.54631	0.468	0.234	6.33261e-78	oocyte
timm29	3.21395e-82	1.16675	0.532	0.284	6.72263e-78	oocyte
tmem70	3.57965e-82	1.49895	0.38	0.162	7.48754e-78	oocyte
exosc8	4.23748e-82	2.96002	0.501	0.263	8.86353e-78	oocyte
orc2	5.79567e-82	1.41216	0.372	0.156	1.21228e-77	oocyte
LOC103390711	6.95744e-82	3.09732	0.856	0.673	1.45529e-77	oocyte
haus2	1.41819e-81	6.89399	0.689	0.444	2.96643e-77	oocyte
LOC103398369	2.91945e-81	7.80888	0.533	0.294	6.10662e-77	oocyte
itih2	2.5805e-80	1.6442	0.305	0.11	5.39764e-76	oocyte
trnau1ap	2.61919e-80	2.37833	0.494	0.261	5.47856e-76	oocyte
LOC103396469	2.6671e-80	0.717613	0.262	0.082	5.57878e-76	oocyte
upb1	3.37822e-80	2.81502	0.338	0.134	7.06622e-76	oocyte
smim12	3.49169e-80	1.08099	0.35	0.141	7.30356e-76	oocyte
LOC103390113	3.52535e-80	7.98245	0.577	0.331	7.37396e-76	oocyte
rpl14	1.06238e-79	10.3993	0.965	0.919	2.22218e-75	oocyte
etfa	1.69024e-79	0.921703	0.294	0.105	3.53548e-75	oocyte
naxe	1.93242e-78	1.859	0.397	0.178	4.04205e-74	oocyte
LOC103398645	5.01539e-78	1.68554	0.412	0.194	1.04907e-73	oocyte
LOC103397751	1.01879e-77	6.95385	0.689	0.478	2.131e-73	oocyte
LOC103387511	3.74033e-77	0.944831	0.572	0.336	7.82364e-73	oocyte
LOC103381200	1.22922e-76	3.47996	0.641	0.395	2.57117e-72	oocyte
LOC107988694	1.46085e-76	1.81119	0.371	0.163	3.05566e-72	oocyte
LOC112488524	2.72383e-76	1.98611	0.632	0.396	5.69744e-72	oocyte
polr2c	4.08964e-76	2.12172	0.384	0.173	8.55431e-72	oocyte
cib1	4.76791e-76	8.13818	0.46	0.243	9.97303e-72	oocyte
LOC112487993	5.47673e-76	1.44236	0.272	0.092	1.14557e-71	oocyte
tufm	7.6047e-76	1.56664	0.55	0.311	1.59068e-71	oocyte
LOC103390639	1.17662e-75	2.02605	0.545	0.312	2.46114e-71	oocyte
LOC103381485	4.38023e-75	2.1014	0.371	0.162	9.16213e-71	oocyte
LOC103393810	4.67632e-75	1.3593	0.281	0.101	9.78146e-71	oocyte
c1qbp	7.55804e-75	3.28678	0.622	0.388	1.58091e-70	oocyte
dad1	1.2381e-74	1.62042	0.345	0.145	2.58973e-70	oocyte
LOC103381707	1.3602e-74	3.20918	0.414	0.195	2.84514e-70	oocyte
fcf1	1.51739e-74	3.26522	0.432	0.208	3.17393e-70	oocyte
mbip	1.92066e-74	0.870367	0.34	0.14	4.01744e-70	oocyte
eci2	2.24646e-74	2.52151	0.446	0.224	4.69892e-70	oocyte
LOC103390715	2.26461e-74	0.957752	0.271	0.094	4.73688e-70	oocyte
wdyhv1	3.30295e-74	4.60536	0.334	0.139	6.90879e-70	oocyte
mrpl38	6.51095e-74	2.59449	0.339	0.14	1.3619e-69	oocyte
iah1	8.44047e-74	1.32399	0.251	0.083	1.76549e-69	oocyte
pudp	9.49949e-74	1.2442	0.326	0.13	1.98701e-69	oocyte
LOC103389639	1.24114e-73	1.43467	0.601	0.367	2.59609e-69	oocyte
LOC103379914	1.36648e-73	0.641829	0.628	0.413	2.85826e-69	oocyte
romo1	2.03565e-73	5.40387	0.546	0.327	4.25797e-69	oocyte
cetn3	4.16294e-73	1.13055	0.271	0.095	8.70761e-69	oocyte
LOC112486237	9.13188e-73	1.21974	0.387	0.177	1.91012e-68	oocyte
opa3	1.1868e-72	1.106	0.267	0.093	2.48244e-68	oocyte
nsmce2	7.74792e-72	1.54171	0.345	0.146	1.62063e-67	oocyte
znhit3	2.19913e-71	3.31421	0.368	0.165	4.59991e-67	oocyte
tprkb	2.57596e-71	1.35434	0.271	0.097	5.38813e-67	oocyte
LOC103392195	3.28754e-71	1.86637	0.641	0.432	6.87655e-67	oocyte
fkbp1b	5.9188e-71	0.87404	0.348	0.149	1.23804e-66	oocyte
LOC103390430	6.97527e-71	3.16638	0.59	0.369	1.45902e-66	oocyte
psmb2	7.46039e-71	4.55302	0.648	0.443	1.56049e-66	oocyte
LOC103389480	1.16331e-70	3.45847	0.389	0.186	2.43329e-66	oocyte
ap2s1	2.76268e-70	1.22041	0.345	0.147	5.7787e-66	oocyte
nudc	3.23889e-70	2.60538	0.538	0.318	6.77478e-66	oocyte
LOC103392281	1.85433e-69	1.886	0.27	0.098	3.87871e-65	oocyte
polr2k	2.18838e-69	6.62997	0.526	0.311	4.57743e-65	oocyte
LOC103396063	3.96592e-69	1.53683	0.329	0.138	8.29552e-65	oocyte
cdc7	4.25827e-69	0.938687	0.278	0.104	8.90701e-65	oocyte
mrpl44	4.9012e-69	1.82887	0.5	0.277	1.02518e-64	oocyte
ndufs4	8.1417e-69	1.63328	0.347	0.152	1.703e-64	oocyte
ddx56	1.08688e-68	1.75276	0.448	0.235	2.27342e-64	oocyte
rpp30	1.30298e-68	0.743876	0.311	0.126	2.72545e-64	oocyte
ier3ip1	2.88911e-68	5.72635	0.43	0.218	6.04316e-64	oocyte
psma8	3.06788e-68	5.53954	0.547	0.339	6.41709e-64	oocyte
sdhd	3.38918e-68	1.94577	0.402	0.194	7.08915e-64	oocyte
aptx	3.58606e-68	0.731839	0.253	0.088	7.50097e-64	oocyte
noc4l	4.08227e-68	1.05535	0.34	0.148	8.53889e-64	oocyte
nup54	4.93951e-68	1.85408	0.429	0.218	1.0332e-63	oocyte
LOC103392034	5.19674e-68	1.76532	0.362	0.167	1.087e-63	oocyte
rpa2	5.71818e-68	2.4384	0.376	0.175	1.19607e-63	oocyte
LOC103381476	9.80127e-68	8.10462	0.84	0.711	2.05013e-63	oocyte
LOC103386141	1.42868e-67	1.13303	0.406	0.197	2.98837e-63	oocyte
mplkip	2.72463e-67	1.82635	0.419	0.211	5.6991e-63	oocyte
rnf4	4.64197e-67	1.36011	0.378	0.179	9.70961e-63	oocyte
LOC103379348	6.67091e-67	1.33474	0.472	0.255	1.39535e-62	oocyte
lamtor3	9.6343e-67	6.2064	0.661	0.474	2.01521e-62	oocyte
LOC103399858	1.04547e-66	0.713648	0.323	0.134	2.18681e-62	oocyte
polr3f	1.40152e-66	1.84418	0.302	0.121	2.93155e-62	oocyte
LOC103382563	1.4189e-66	2.06108	0.584	0.375	2.96792e-62	oocyte
pop7	1.49565e-66	1.29003	0.348	0.155	3.12844e-62	oocyte
ctsa	1.49703e-66	0.905723	0.665	0.447	3.13134e-62	oocyte
itpa	3.52377e-66	1.26635	0.347	0.155	7.37068e-62	oocyte
rps4x	6.9261e-66	15.3484	0.973	0.961	1.44873e-61	oocyte
LOC103385783	6.988e-66	2.04319	0.392	0.189	1.46168e-61	oocyte
LOC103388296	8.71767e-66	1.19195	0.384	0.181	1.82347e-61	oocyte
rpl24	9.78798e-66	6.91258	0.932	0.856	2.04735e-61	oocyte
inka1	1.05798e-65	1.4548	0.404	0.201	2.21299e-61	oocyte
znf593	1.39924e-65	1.03651	0.291	0.115	2.9268e-61	oocyte
LOC103386847	2.39641e-65	2.67706	0.499	0.288	5.01257e-61	oocyte
rabif	2.66683e-65	2.33341	0.366	0.171	5.5782e-61	oocyte
sde2	2.8097e-65	1.71075	0.455	0.247	5.87705e-61	oocyte
sf3b6	3.64415e-65	1.84508	0.469	0.261	7.62247e-61	oocyte
nop16	8.57088e-65	2.13332	0.501	0.292	1.79277e-60	oocyte
LOC103395883	1.00988e-64	0.479815	0.594	0.373	2.11237e-60	oocyte
lamtor4	1.10948e-64	8.23449	0.679	0.493	2.32069e-60	oocyte
llph	2.32478e-64	2.4258	0.444	0.24	4.86273e-60	oocyte
LOC103395854	2.82834e-64	2.29862	0.387	0.191	5.91605e-60	oocyte
LOC103395326	2.97903e-64	1.85105	0.425	0.222	6.23124e-60	oocyte
cript	3.3533e-64	4.91493	0.482	0.272	7.0141e-60	oocyte
mrps18a	4.55009e-64	3.03003	0.492	0.289	9.51742e-60	oocyte
ifi30	4.74333e-64	0.964491	0.271	0.104	9.92162e-60	oocyte
pgam5	5.17136e-64	0.752495	0.368	0.171	1.08169e-59	oocyte
rangrf	5.69609e-64	1.39803	0.311	0.131	1.19145e-59	oocyte
cby1	6.90113e-64	3.41953	0.356	0.166	1.44351e-59	oocyte
snrpd2	1.07734e-63	4.35425	0.689	0.493	2.25347e-59	oocyte
LOC107988151	2.09092e-63	1.26908	0.336	0.151	4.37358e-59	oocyte
LOC103387960	2.53971e-63	0.774796	0.325	0.14	5.3123e-59	oocyte
myo3b	3.01075e-63	2.67555	0.345	0.156	6.29759e-59	oocyte
LOC103394526	3.78797e-63	0.931752	0.572	0.352	7.9233e-59	oocyte
c2h8orf82	3.84718e-63	0.841407	0.284	0.114	8.04714e-59	oocyte
atf7ip2	5.07371e-63	2.37389	0.396	0.197	1.06127e-58	oocyte
rex1bd	5.16955e-63	1.31852	0.37	0.177	1.08131e-58	oocyte
mpv17	5.97157e-63	0.668625	0.276	0.109	1.24907e-58	oocyte
ctso	8.55229e-63	0.713828	0.507	0.297	1.78888e-58	oocyte
naa38	9.88377e-63	3.9892	0.49	0.282	2.06739e-58	oocyte
mipol1	1.5582e-62	5.3414	0.414	0.218	3.25929e-58	oocyte
LOC103382459	1.85847e-62	1.3783	0.363	0.172	3.88736e-58	oocyte
mrpl30	3.42966e-62	2.64007	0.293	0.119	7.17383e-58	oocyte
LOC103379375	5.41532e-62	0.703026	0.323	0.141	1.13272e-57	oocyte
sgf29	5.84708e-62	1.25786	0.398	0.203	1.22303e-57	oocyte
bcas2	1.66348e-61	0.825537	0.432	0.228	3.47951e-57	oocyte
lsm8	1.82208e-61	3.55875	0.565	0.357	3.81124e-57	oocyte
LOC103384094	2.44455e-61	0.921953	0.329	0.145	5.11327e-57	oocyte
glrx3	4.55178e-61	2.86189	0.483	0.286	9.52096e-57	oocyte
ndufa13	5.6829e-61	11.764	0.577	0.377	1.18869e-56	oocyte
zar1l	6.18096e-61	9.8838	0.599	0.378	1.29287e-56	oocyte
tiprl	6.88485e-61	1.72962	0.416	0.217	1.4401e-56	oocyte
mgme1	7.45167e-61	0.663767	0.338	0.153	1.55867e-56	oocyte
ndufa10	1.46483e-60	2.27539	0.468	0.265	3.06399e-56	oocyte
LOC103398772	3.1425e-60	1.21043	0.389	0.194	6.57317e-56	oocyte
mmadhc	3.4317e-60	0.859855	0.39	0.199	7.17808e-56	oocyte
LOC103396797	3.8999e-60	0.871347	0.308	0.133	8.15743e-56	oocyte
LOC103387577	8.12032e-60	1.34751	0.309	0.135	1.69853e-55	oocyte
stk19	1.25623e-59	1.24843	0.252	0.096	2.62765e-55	oocyte
LOC112487990	1.42601e-59	0.729117	0.259	0.1	2.98279e-55	oocyte
snupn	2.77167e-59	0.683772	0.278	0.112	5.79749e-55	oocyte
lypla1	5.82413e-59	0.944177	0.348	0.163	1.21823e-54	oocyte
LOC103388494	6.93876e-59	0.612161	0.376	0.186	1.45138e-54	oocyte
rfc2	8.35532e-59	0.989628	0.364	0.176	1.74768e-54	oocyte
dph3	1.056e-58	6.13641	0.401	0.213	2.20884e-54	oocyte
manbal	1.12892e-58	3.29037	0.36	0.175	2.36135e-54	oocyte
dnajc19	1.49581e-58	9.59226	0.496	0.296	3.12878e-54	oocyte
LOC103389361	1.987e-58	0.487466	0.435	0.233	4.1562e-54	oocyte
mrps11	2.19742e-58	4.55998	0.542	0.347	4.59634e-54	oocyte
LOC103393217	2.25659e-58	2.3664	0.305	0.133	4.72011e-54	oocyte
mrpl33	2.61003e-58	3.61491	0.35	0.169	5.45941e-54	oocyte
taf12	2.6717e-58	4.67043	0.483	0.286	5.5884e-54	oocyte
coq9	2.86488e-58	1.3336	0.321	0.149	5.99247e-54	oocyte
LOC103395697	3.07157e-58	1.09733	0.335	0.155	6.4248e-54	oocyte
ddx49	3.12174e-58	1.31693	0.437	0.239	6.52975e-54	oocyte
rpl5	4.45573e-58	6.9154	0.727	0.551	9.32006e-54	oocyte
LOC103388489	4.84994e-58	2.01173	0.342	0.166	1.01446e-53	oocyte
tspan11	5.25959e-58	0.693924	0.283	0.116	1.10015e-53	oocyte
hint2	5.44646e-58	1.31711	0.31	0.137	1.13924e-53	oocyte
nuf2	7.51619e-58	1.11472	0.381	0.189	1.57216e-53	oocyte
znhit1	8.42275e-58	2.06448	0.359	0.175	1.76179e-53	oocyte
gstz1	8.65224e-58	1.4539	0.3	0.13	1.80979e-53	oocyte
pex16	1.07782e-57	1.9718	0.385	0.197	2.25447e-53	oocyte
htd2	1.77256e-57	0.713627	0.278	0.114	3.70766e-53	oocyte
ndufb7	2.13932e-57	6.50508	0.487	0.29	4.47482e-53	oocyte
umps	2.18685e-57	0.790204	0.459	0.257	4.57423e-53	oocyte
bud31	2.53097e-57	7.52854	0.473	0.277	5.29402e-53	oocyte
LOC112487757	2.97993e-57	1.37451	0.34	0.16	6.23312e-53	oocyte
rnf113a	3.27465e-57	1.85453	0.415	0.225	6.84959e-53	oocyte
LOC103389665	3.41848e-57	1.42775	0.347	0.166	7.15043e-53	oocyte
eif2b1	3.73792e-57	0.859516	0.341	0.161	7.81861e-53	oocyte
polr1e	3.76019e-57	1.06838	0.286	0.121	7.86519e-53	oocyte
LOC103394774	4.20045e-57	0.66312	0.723	0.529	8.78608e-53	oocyte
fam32a	4.68802e-57	2.98413	0.457	0.265	9.80592e-53	oocyte
ssr4	6.33716e-57	3.46366	0.598	0.413	1.32554e-52	oocyte
LOC103398547	7.13279e-57	1.29848	0.347	0.17	1.49197e-52	oocyte
erg28	8.6193e-57	1.64831	0.398	0.208	1.8029e-52	oocyte
prim2	1.24367e-56	0.760447	0.328	0.151	2.60138e-52	oocyte
emc6	1.28211e-56	1.97199	0.435	0.239	2.68178e-52	oocyte
psmc4	1.31805e-56	2.14197	0.53	0.336	2.75696e-52	oocyte
ca7	1.48077e-56	1.14425	0.355	0.172	3.09733e-52	oocyte
LOC103383985	1.57799e-56	3.25691	0.393	0.209	3.30069e-52	oocyte
LOC103391468	2.36436e-56	1.61806	0.279	0.116	4.94553e-52	oocyte
LOC103380056	3.06396e-56	1.37992	0.358	0.176	6.40889e-52	oocyte
nicn1	3.66132e-56	0.686359	0.362	0.18	7.65838e-52	oocyte
LOC103393784	3.67536e-56	1.58054	0.349	0.166	7.68774e-52	oocyte
cdc20	3.99798e-56	0.389011	0.734	0.54	8.36258e-52	oocyte
ino80e	4.71028e-56	1.36851	0.368	0.183	9.85249e-52	oocyte
maip1	8.80772e-56	0.853302	0.305	0.136	1.84231e-51	oocyte
LOC103397468	9.70577e-56	1.51877	0.305	0.135	2.03016e-51	oocyte
LOC103387033	1.16554e-55	10.2211	0.57	0.374	2.43797e-51	oocyte
LOC103377236	1.275e-55	0.937337	0.271	0.112	2.66692e-51	oocyte
mrpl18	1.52818e-55	1.91169	0.465	0.272	3.1965e-51	oocyte
fkbp2	1.94734e-55	1.57202	0.409	0.216	4.07325e-51	oocyte
LOC103390007	2.08747e-55	0.681788	0.487	0.287	4.36637e-51	oocyte
LOC103390983	4.91398e-55	4.98198	0.634	0.456	1.02786e-50	oocyte
psmb4	5.66178e-55	1.81979	0.602	0.419	1.18427e-50	oocyte
cmpk1	7.07512e-55	0.954407	0.347	0.17	1.4799e-50	oocyte
nhp2	7.52498e-55	0.343745	0.734	0.553	1.574e-50	oocyte
dnajc15	7.53978e-55	0.772206	0.296	0.131	1.5771e-50	oocyte
wdr18	1.07315e-54	0.899462	0.395	0.206	2.24471e-50	oocyte
mettl5	2.0368e-54	1.88551	0.308	0.14	4.26037e-50	oocyte
med11	2.04835e-54	1.67208	0.265	0.11	4.28454e-50	oocyte
yars2	2.33278e-54	0.589191	0.252	0.101	4.87947e-50	oocyte
timm13	5.39622e-54	1.81401	0.376	0.193	1.12873e-49	oocyte
ubc	9.60408e-54	9.41052	0.853	0.764	2.00889e-49	oocyte
bdh2	1.05196e-53	0.728235	0.293	0.129	2.20038e-49	oocyte
LOC103391261	2.1501e-53	2.20625	0.316	0.149	4.49737e-49	oocyte
cisd1	2.39513e-53	1.89584	0.404	0.214	5.00988e-49	oocyte
med21	2.49708e-53	3.53159	0.51	0.324	5.22314e-49	oocyte
LOC103392938	2.96123e-53	1.01336	0.345	0.17	6.19401e-49	oocyte
ppp2cb	4.00551e-53	5.59604	0.612	0.434	8.37832e-49	oocyte
iqcc	4.17816e-53	0.63985	0.256	0.104	8.73946e-49	oocyte
LOC103381290	5.77246e-53	0.669316	0.259	0.106	1.20743e-48	oocyte
LOC103389673	6.69884e-53	3.86403	0.492	0.301	1.4012e-48	oocyte
LOC103385789	1.1687e-52	0.553492	0.321	0.147	2.44456e-48	oocyte
gfer	1.29615e-52	0.98489	0.314	0.148	2.71116e-48	oocyte
sod1	1.72432e-52	4.13917	0.869	0.784	3.60676e-48	oocyte
prdx6	3.25609e-52	3.24896	0.466	0.279	6.81077e-48	oocyte
blmh	5.86781e-52	1.03327	0.432	0.243	1.22737e-47	oocyte
LOC103395050	6.12423e-52	4.80147	0.74	0.577	1.28101e-47	oocyte
LOC103388254	8.18561e-52	2.94082	0.511	0.317	1.71218e-47	oocyte
LOC103390468	1.10999e-51	2.41994	0.394	0.215	2.32176e-47	oocyte
rps24	1.22217e-51	4.40187	0.982	0.969	2.55642e-47	oocyte
snrpf	2.25171e-51	5.39325	0.606	0.415	4.70989e-47	oocyte
tada2a	2.52838e-51	0.847865	0.269	0.115	5.28861e-47	oocyte
LOC103384273	3.75029e-51	1.33115	0.442	0.258	7.84447e-47	oocyte
rexo2	4.70499e-51	1.07142	0.521	0.329	9.84143e-47	oocyte
mrpl3	5.3344e-51	1.41079	0.357	0.179	1.1158e-46	oocyte
LOC103393660	1.09997e-50	1.03429	0.274	0.12	2.30081e-46	oocyte
LOC103385571	1.19491e-50	7.35993	0.586	0.395	2.49939e-46	oocyte
ppil1	3.28755e-50	1.15555	0.31	0.147	6.87657e-46	oocyte
pcid2	4.54966e-50	0.81768	0.258	0.109	9.51651e-46	oocyte
LOC103394751	6.31483e-50	6.87948	0.649	0.46	1.32087e-45	oocyte
rpf1	9.3946e-50	1.32644	0.5	0.306	1.96507e-45	oocyte
mdh1	1.11626e-49	1.62605	0.476	0.292	2.33489e-45	oocyte
rammet	1.2287e-49	1.64317	0.383	0.209	2.57007e-45	oocyte
rtca	1.28605e-49	1.76495	0.279	0.125	2.69002e-45	oocyte
LOC103377095	1.62963e-49	11.1081	0.954	0.906	3.40869e-45	oocyte
taf11	1.72972e-49	1.60898	0.372	0.197	3.61806e-45	oocyte
phb2	1.83639e-49	0.970843	0.433	0.251	3.84117e-45	oocyte
LOC103397084	5.23785e-49	1.57132	0.303	0.145	1.0956e-44	oocyte
eef1e1	6.84675e-49	0.90543	0.278	0.124	1.43214e-44	oocyte
pole3	2.83323e-48	2.52585	0.549	0.364	5.92626e-44	oocyte
LOC103393012	3.20707e-48	2.76715	0.502	0.309	6.70823e-44	oocyte
LOC103392083	1.16624e-47	0.389033	0.316	0.153	2.43942e-43	oocyte
ndufs5	1.53017e-47	4.03702	0.547	0.371	3.20066e-43	oocyte
rnf185	1.60588e-47	0.752139	0.314	0.154	3.35902e-43	oocyte
rsl1d1	1.67893e-47	2.56334	0.552	0.366	3.51182e-43	oocyte
LOC103386870	4.85018e-47	0.441962	0.294	0.137	1.01451e-42	oocyte
znf414	5.17903e-47	0.904292	0.339	0.175	1.0833e-42	oocyte
LOC103396574	5.43523e-47	0.742566	0.271	0.123	1.13689e-42	oocyte
cct5	6.55821e-47	3.9796	0.653	0.505	1.37178e-42	oocyte
LOC103376744	6.81145e-47	1.05813	0.368	0.199	1.42475e-42	oocyte
gstk1	6.86697e-47	1.33482	0.288	0.134	1.43636e-42	oocyte
LOC103399986	7.47288e-47	0.473958	0.262	0.116	1.5631e-42	oocyte
emg1	7.60464e-47	1.13062	0.482	0.307	1.59066e-42	oocyte
prdx4	1.24672e-46	2.32203	0.478	0.297	2.60776e-42	oocyte
tmem11	1.38389e-46	3.82315	0.404	0.231	2.89469e-42	oocyte
drg1	1.44555e-46	1.18472	0.376	0.206	3.02366e-42	oocyte
parvb	2.34296e-46	2.45771	0.324	0.164	4.90078e-42	oocyte
cfl2	2.73808e-46	3.57538	0.741	0.598	5.72725e-42	oocyte
rdm1	3.86118e-46	1.07779	0.392	0.22	8.07644e-42	oocyte
LOC103398246	4.32789e-46	1.09671	0.281	0.132	9.05265e-42	oocyte
LOC103389688	1.04059e-45	1.08983	0.518	0.335	2.17661e-41	oocyte
LOC103389252	1.17916e-45	2.34432	0.37	0.201	2.46644e-41	oocyte
tmem199	1.18546e-45	0.856884	0.319	0.159	2.47963e-41	oocyte
rprd1a	1.74247e-45	4.21387	0.347	0.183	3.64473e-41	oocyte
LOC103377325	1.80184e-45	4.66754	0.362	0.195	3.76891e-41	oocyte
ak6	2.14255e-45	1.97707	0.325	0.167	4.48157e-41	oocyte
pet100	2.15951e-45	2.15452	0.254	0.114	4.51706e-41	oocyte
LOC103396166	2.62902e-45	1.27206	0.326	0.167	5.49912e-41	oocyte
LOC103381080	2.6613e-45	0.735394	0.26	0.117	5.56665e-41	oocyte
trappc1	2.99582e-45	1.97504	0.429	0.257	6.26635e-41	oocyte
lsm11	4.26148e-45	1.50121	0.283	0.133	8.91374e-41	oocyte
bet1	4.6445e-45	0.740079	0.28	0.132	9.7149e-41	oocyte
med8	5.01132e-45	0.788421	0.338	0.178	1.04822e-40	oocyte
nubpl	1.76238e-44	1.66571	0.387	0.215	3.68637e-40	oocyte
fam96b	1.90884e-44	1.98815	0.449	0.281	3.99273e-40	oocyte
rpl28	2.09035e-44	26.3508	0.945	0.892	4.37239e-40	oocyte
LOC103389383	3.52683e-44	1.18602	0.285	0.136	7.37708e-40	oocyte
haus7	6.27067e-44	1.16874	0.32	0.164	1.31164e-39	oocyte
LOC112487970	7.75171e-44	1.00863	0.291	0.141	1.62142e-39	oocyte
crcp	9.08853e-44	2.58199	0.274	0.128	1.90105e-39	oocyte
abraxas1	1.3522e-43	1.14319	0.28	0.135	2.8284e-39	oocyte
LOC103383261	1.44438e-43	0.846335	0.255	0.117	3.0212e-39	oocyte
fkbp3	1.51616e-43	0.413403	0.347	0.183	3.17135e-39	oocyte
eci1	2.98559e-43	1.13571	0.421	0.25	6.24497e-39	oocyte
snrnp40	3.06667e-43	1.17908	0.422	0.252	6.41456e-39	oocyte
ubl5	3.75938e-43	5.46496	0.537	0.366	7.8635e-39	oocyte
tomm22	4.01593e-43	1.01731	0.381	0.215	8.40012e-39	oocyte
zwilch	5.02785e-43	0.793167	0.354	0.191	1.05168e-38	oocyte
eloc	5.58074e-43	3.1254	0.556	0.402	1.16732e-38	oocyte
hat1	7.05785e-43	0.843992	0.31	0.158	1.47629e-38	oocyte
LOC103393683	9.5306e-43	12.4003	0.998	0.988	1.99352e-38	oocyte
LOC103387048	1.00452e-42	1.30054	0.291	0.143	2.10115e-38	oocyte
LOC103383835	1.33604e-42	1.11057	0.295	0.146	2.79459e-38	oocyte
dnajc9	1.4229e-42	1.64281	0.397	0.23	2.97628e-38	oocyte
ndufa12	1.51107e-42	0.968634	0.253	0.116	3.16071e-38	oocyte
LOC103378130	1.74686e-42	0.764979	0.349	0.191	3.65392e-38	oocyte
pebp1	1.94556e-42	1.23827	0.371	0.21	4.06952e-38	oocyte
LOC103383373	1.97273e-42	0.747778	0.374	0.211	4.12636e-38	oocyte
med27	2.00859e-42	0.798896	0.301	0.151	4.20136e-38	oocyte
tsr3	3.57696e-42	0.979616	0.356	0.197	7.48193e-38	oocyte
ndufa3	5.99892e-42	3.98765	0.459	0.293	1.25479e-37	oocyte
psmb3	9.97201e-42	0.839096	0.454	0.29	2.08585e-37	oocyte
gtf2b	1.34423e-41	2.11226	0.57	0.403	2.81172e-37	oocyte
ncbp2	2.01843e-41	1.16482	0.338	0.182	4.22194e-37	oocyte
LOC103397273	2.03988e-41	1.25257	0.27	0.129	4.26682e-37	oocyte
ubl7	2.29526e-41	1.90288	0.318	0.169	4.801e-37	oocyte
naa10	2.58392e-41	1.24783	0.336	0.181	5.40478e-37	oocyte
cnpy2	2.76121e-41	0.470702	0.421	0.256	5.77563e-37	oocyte
chchd5	3.46231e-41	1.47469	0.383	0.219	7.24212e-37	oocyte
elp5	5.32593e-41	0.900691	0.344	0.187	1.11402e-36	oocyte
LOC103389233	5.87028e-41	1.94102	0.662	0.468	1.22789e-36	oocyte
mrps15	6.02081e-41	0.936607	0.324	0.172	1.25937e-36	oocyte
pus3	7.42956e-41	0.569016	0.535	0.357	1.55404e-36	oocyte
LOC103396892	1.66979e-40	0.5796	0.293	0.148	3.49269e-36	oocyte
auh	1.99775e-40	0.392585	0.272	0.13	4.17869e-36	oocyte
LOC103384407	2.04478e-40	1.22004	0.27	0.13	4.27707e-36	oocyte
rpf2	2.38154e-40	3.71557	0.442	0.276	4.98146e-36	oocyte
ssr3	5.26911e-40	1.05143	0.539	0.371	1.10214e-35	oocyte
cct8	6.68864e-40	1.72666	0.678	0.529	1.39906e-35	oocyte
LOC103394983	7.53595e-40	0.763044	0.259	0.124	1.57629e-35	oocyte
tmem242	8.35713e-40	0.649108	0.305	0.158	1.74806e-35	oocyte
mrpl45	9.30699e-40	0.972965	0.368	0.205	1.94674e-35	oocyte
LOC103385377	9.66657e-40	0.804655	0.255	0.119	2.02196e-35	oocyte
zcchc9	1.72441e-39	1.14495	0.382	0.224	3.60696e-35	oocyte
ovca2	1.8662e-39	0.621062	0.316	0.164	3.90354e-35	oocyte
alg14	2.12566e-39	0.398829	0.253	0.119	4.44624e-35	oocyte
LOC103378600	4.3335e-39	6.21269	0.41	0.253	9.06438e-35	oocyte
eif2s1	4.95796e-39	1.9125	0.528	0.369	1.03706e-34	oocyte
LOC103381917	5.34742e-39	1.99835	0.376	0.222	1.11852e-34	oocyte
LOC103397732	6.29024e-39	0.644746	0.329	0.177	1.31573e-34	oocyte
gdf9	6.51899e-39	0.809657	0.476	0.299	1.36358e-34	oocyte
rcor2	6.9481e-39	0.504774	0.27	0.133	1.45333e-34	oocyte
krtcap2	1.39884e-38	0.428493	0.255	0.121	2.92596e-34	oocyte
isoc2	1.56019e-38	0.630907	0.259	0.124	3.26346e-34	oocyte
LOC103394257	1.74319e-38	1.30708	0.586	0.445	3.64623e-34	oocyte
wdr77	2.77765e-38	0.955902	0.449	0.287	5.81002e-34	oocyte
dcun1d5	3.00578e-38	0.79601	0.316	0.17	6.28719e-34	oocyte
mad2l1	3.73775e-38	5.09752	0.453	0.286	7.81826e-34	oocyte
mtx2	3.90995e-38	0.982709	0.387	0.23	8.17845e-34	oocyte
cops9	4.23852e-38	4.69791	0.485	0.33	8.86571e-34	oocyte
prr18	4.24859e-38	2.12427	0.342	0.192	8.88677e-34	oocyte
hsbp1	7.04194e-38	1.31119	0.286	0.148	1.47296e-33	oocyte
rwdd4	7.3658e-38	0.575883	0.281	0.143	1.5407e-33	oocyte
LOC103379834	7.73442e-38	0.80861	0.259	0.127	1.61781e-33	oocyte
ndufv1	8.08435e-38	1.14642	0.416	0.261	1.691e-33	oocyte
LOC103397485	1.19801e-37	2.33935	0.454	0.297	2.50589e-33	oocyte
LOC103391409	1.23985e-37	0.737206	0.288	0.15	2.5934e-33	oocyte
mif	1.46308e-37	1.11786	0.261	0.129	3.06032e-33	oocyte
LOC103386173	1.48806e-37	2.40125	0.416	0.257	3.11257e-33	oocyte
LOC103399882	1.55337e-37	0.287174	0.477	0.307	3.24918e-33	oocyte
LOC103387254	2.15556e-37	2.332	0.492	0.336	4.50879e-33	oocyte
LOC103383506	2.43958e-37	1.42711	0.364	0.21	5.10288e-33	oocyte
mrpl20	2.74269e-37	1.04422	0.315	0.17	5.73688e-33	oocyte
mrps35	3.32016e-37	1.11928	0.351	0.198	6.94478e-33	oocyte
LOC103394307	3.34872e-37	0.825274	0.407	0.252	7.00453e-33	oocyte
prmt1	4.12944e-37	1.25563	0.347	0.199	8.63756e-33	oocyte
penk	6.59792e-37	2.46446	0.267	0.133	1.38009e-32	oocyte
sec11a	8.48962e-37	1.24494	0.406	0.252	1.77577e-32	oocyte
acat1	9.79374e-37	0.375285	0.34	0.191	2.04856e-32	oocyte
LOC103390525	9.92153e-37	0.610837	0.271	0.137	2.07529e-32	oocyte
wdr61	1.24741e-36	0.737521	0.263	0.132	2.6092e-32	oocyte
ybey	1.65539e-36	1.45825	0.339	0.193	3.46258e-32	oocyte
cenpk	1.9614e-36	0.513019	0.268	0.135	4.10265e-32	oocyte
clpp	2.19282e-36	0.875911	0.272	0.138	4.58672e-32	oocyte
LOC103378045	2.24836e-36	1.98169	0.443	0.28	4.7029e-32	oocyte
LOC103378628	3.00619e-36	0.310724	0.278	0.142	6.28805e-32	oocyte
LOC103379188	4.43554e-36	1.77549	0.396	0.24	9.27782e-32	oocyte
tmem144	1.60894e-35	0.832715	0.473	0.31	3.36542e-31	oocyte
bloc1s1	1.67967e-35	0.698321	0.294	0.156	3.51337e-31	oocyte
mmgt1	2.41927e-35	1.16223	0.368	0.215	5.06038e-31	oocyte
yipf4	2.7539e-35	0.585463	0.277	0.145	5.76033e-31	oocyte
nus1	2.86177e-35	0.810016	0.254	0.126	5.98597e-31	oocyte
bysl	4.47525e-35	0.721417	0.28	0.147	9.36089e-31	oocyte
gtdc1	4.90687e-35	1.16191	0.312	0.171	1.02637e-30	oocyte
srp9	9.88805e-35	4.84441	0.358	0.208	2.06828e-30	oocyte
LOC103389306	9.94205e-35	0.764284	0.256	0.128	2.07958e-30	oocyte
LOC103387620	1.06347e-34	1.74743	0.363	0.217	2.22447e-30	oocyte
smarcb1	1.12236e-34	0.845745	0.406	0.252	2.34765e-30	oocyte
sec61b	1.71259e-34	1.70316	0.414	0.265	3.58223e-30	oocyte
zcchc10	1.85507e-34	1.04278	0.346	0.202	3.88026e-30	oocyte
LOC103391930	2.0427e-34	0.957297	0.432	0.283	4.27272e-30	oocyte
LOC103389710	2.33782e-34	0.579779	0.316	0.178	4.89003e-30	oocyte
LOC103389891	2.57019e-34	0.493814	0.492	0.331	5.37606e-30	oocyte
tsfm	3.37129e-34	0.410062	0.279	0.147	7.05172e-30	oocyte
napa	4.00099e-34	1.26041	0.335	0.194	8.36888e-30	oocyte
rrp9	5.04288e-34	1.25124	0.385	0.236	1.05482e-29	oocyte
snrpb2	6.18228e-34	1.65609	0.478	0.327	1.29315e-29	oocyte
thyn1	8.16932e-34	0.943323	0.26	0.132	1.70878e-29	oocyte
LOC103398254	8.57393e-34	0.572768	0.276	0.147	1.79341e-29	oocyte
LOC103378402	8.6903e-34	1.99353	0.416	0.266	1.81775e-29	oocyte
LOC103381359	1.33542e-33	0.509788	0.48	0.322	2.79331e-29	oocyte
LOC103382060	2.32533e-33	10.6933	0.929	0.885	4.8639e-29	oocyte
psma5	2.59692e-33	1.11883	0.423	0.271	5.43199e-29	oocyte
znrd1	3.87792e-33	0.587423	0.423	0.27	8.11144e-29	oocyte
cwc25	4.01514e-33	1.8499	0.419	0.27	8.39847e-29	oocyte
pin1	5.42653e-33	0.405518	0.274	0.145	1.13507e-28	oocyte
gdf3	5.67929e-33	0.764345	0.269	0.141	1.18794e-28	oocyte
LOC103385508	9.44338e-33	0.517461	0.334	0.194	1.97527e-28	oocyte
ctu1	9.94765e-33	0.613605	0.268	0.139	2.08075e-28	oocyte
LOC103389945	1.0098e-32	8.62826	0.413	0.269	2.11219e-28	oocyte
rcl1	1.70944e-32	0.813377	0.457	0.313	3.57563e-28	oocyte
psma2	3.20609e-32	3.91378	0.361	0.218	6.70618e-28	oocyte
lactb2	3.70149e-32	0.833116	0.256	0.132	7.7424e-28	oocyte
LOC103378457	5.35912e-32	0.725292	0.407	0.258	1.12097e-27	oocyte
LOC103393287	7.21628e-32	3.12509	0.589	0.434	1.50943e-27	oocyte
mlf2	1.12988e-31	0.77674	0.312	0.178	2.36337e-27	oocyte
serp1	1.41202e-31	1.76018	0.477	0.342	2.95353e-27	oocyte
LOC103398887	1.99264e-31	0.341336	0.603	0.458	4.16799e-27	oocyte
mrpl52	2.73802e-31	4.69861	0.368	0.23	5.72711e-27	oocyte
psmd7	3.7749e-31	1.71812	0.381	0.239	7.89597e-27	oocyte
aimp2	7.61898e-31	1.08741	0.406	0.267	1.59366e-26	oocyte
c9h6orf120	8.62861e-31	1.32717	0.442	0.294	1.80485e-26	oocyte
LOC103393878	1.45221e-30	7.05469	0.636	0.507	3.03758e-26	oocyte
ahcy	1.88213e-30	1.92017	0.501	0.352	3.93686e-26	oocyte
LOC103393826	2.82345e-30	0.522523	0.325	0.189	5.90581e-26	oocyte
iscu	3.1149e-30	1.14406	0.479	0.338	6.51544e-26	oocyte
psenen	3.368e-30	0.663795	0.288	0.162	7.04486e-26	oocyte
kcnn4	5.03561e-30	0.37368	0.273	0.146	1.0533e-25	oocyte
LOC103389907	7.81055e-30	0.931133	0.255	0.136	1.63373e-25	oocyte
bccip	1.10917e-29	0.902879	0.376	0.237	2.32005e-25	oocyte
tipin	1.50936e-29	0.594774	0.288	0.161	3.15712e-25	oocyte
gadd45gip1	2.45113e-29	0.908882	0.259	0.141	5.12704e-25	oocyte
LOC103397290	2.6109e-29	1.30451	0.377	0.235	5.46121e-25	oocyte
yeats4	2.70262e-29	0.602415	0.274	0.151	5.65307e-25	oocyte
LOC103379158	2.9183e-29	0.421752	0.304	0.175	6.10422e-25	oocyte
LOC103393932	5.24675e-29	0.59587	0.264	0.145	1.09746e-24	oocyte
rab5if	5.48306e-29	1.0707	0.375	0.24	1.14689e-24	oocyte
LOC103387825	6.89704e-29	0.731856	0.306	0.178	1.44265e-24	oocyte
mrps14	8.24875e-29	2.17282	0.334	0.203	1.72539e-24	oocyte
mrm3	1.52007e-28	0.724025	0.309	0.184	3.17953e-24	oocyte
fam136a	1.64941e-28	0.682742	0.284	0.162	3.45007e-24	oocyte
txndc12	2.87842e-28	0.673458	0.291	0.166	6.02078e-24	oocyte
psmd8	3.34495e-28	0.544517	0.269	0.151	6.99663e-24	oocyte
c20h14orf119	3.70698e-28	1.48682	0.386	0.249	7.75389e-24	oocyte
psma3	3.75634e-28	1.83646	0.539	0.403	7.85715e-24	oocyte
txn2	6.20651e-28	1.18346	0.452	0.31	1.29822e-23	oocyte
mrpl17	6.4799e-28	1.65575	0.52	0.379	1.3554e-23	oocyte
ubfd1	6.79569e-28	0.980264	0.347	0.213	1.42145e-23	oocyte
LOC103378164	7.36143e-28	1.00247	0.442	0.291	1.53979e-23	oocyte
mcrs1	9.47817e-28	0.720311	0.285	0.164	1.98255e-23	oocyte
mrpl27	1.02753e-27	1.38751	0.29	0.169	2.14928e-23	oocyte
srprb	1.05199e-27	0.830554	0.316	0.192	2.20045e-23	oocyte
naaa	3.21214e-27	0.699321	0.281	0.163	6.71883e-23	oocyte
pak1ip1	3.3444e-27	1.86764	0.376	0.244	6.99547e-23	oocyte
tfb2m	6.48422e-27	0.637566	0.376	0.242	1.3563e-22	oocyte
prdx3	6.64792e-27	1.60835	0.391	0.259	1.39054e-22	oocyte
ncaph2	6.94857e-27	1.10614	0.255	0.14	1.45343e-22	oocyte
LOC103398348	1.37204e-26	0.479483	0.197	0.336	2.86989e-22	oocyte
spryd7	1.95932e-26	0.880929	0.295	0.175	4.0983e-22	oocyte
dnajc25	2.2179e-26	0.786693	0.42	0.281	4.63919e-22	oocyte
LOC103385815	2.67567e-26	1.12142	0.378	0.249	5.5967e-22	oocyte
LOC103385334	2.80223e-26	0.600418	0.268	0.154	5.86143e-22	oocyte
homer2	4.3861e-26	0.613144	0.324	0.196	9.1744e-22	oocyte
psmd10	4.4542e-26	4.0565	0.375	0.248	9.31684e-22	oocyte
ccdc137	4.76301e-26	1.55559	0.332	0.208	9.96279e-22	oocyte
LOC103381369	5.21239e-26	0.724823	0.274	0.157	1.09028e-21	oocyte
ccdc115	5.64916e-26	1.26831	0.261	0.149	1.18164e-21	oocyte
pih1d1	6.24184e-26	0.347239	0.301	0.178	1.30561e-21	oocyte
atp6v1d	6.94146e-26	0.834936	0.253	0.142	1.45194e-21	oocyte
mettl18	1.20818e-25	0.458919	0.267	0.152	2.52715e-21	oocyte
LOC103379975	1.47884e-25	0.448923	0.284	0.167	3.09329e-21	oocyte
LOC103386382	1.70405e-25	2.61649	0.669	0.562	3.56436e-21	oocyte
orc5	2.18961e-25	0.530846	0.257	0.146	4.58e-21	oocyte
glo1	2.88147e-25	0.439379	0.259	0.147	6.02716e-21	oocyte
prpf38a	3.60414e-25	0.782787	0.357	0.23	7.53878e-21	oocyte
nup62	4.22196e-25	0.490621	0.357	0.23	8.83108e-21	oocyte
lrrc59	6.29524e-25	0.815333	0.324	0.203	1.31678e-20	oocyte
LOC103382684	9.79218e-25	0.296608	0.274	0.16	2.04823e-20	oocyte
LOC103393408	1.00695e-24	0.632279	0.344	0.221	2.10623e-20	oocyte
LOC103385929	1.40191e-24	4.72932	0.496	0.373	2.93238e-20	oocyte
dtd2	1.57196e-24	1.04915	0.316	0.195	3.28807e-20	oocyte
tcta	2.15414e-24	1.51913	0.421	0.291	4.50581e-20	oocyte
LOC103394540	3.66124e-24	1.51655	0.399	0.272	7.65822e-20	oocyte
LOC103394542	4.38305e-24	0.361867	0.307	0.189	9.16803e-20	oocyte
dcaf13	4.67457e-24	3.20634	0.297	0.181	9.7778e-20	oocyte
LOC103382198	7.76775e-24	0.903787	0.313	0.196	1.62478e-19	oocyte
fis1	8.45928e-24	1.65153	0.442	0.325	1.76943e-19	oocyte
tmem128	1.14461e-23	0.742394	0.269	0.16	2.39419e-19	oocyte
LOC103399253	1.44208e-23	0.535838	0.293	0.181	3.01639e-19	oocyte
LOC103391314	1.51365e-23	0.735487	0.27	0.161	3.16611e-19	oocyte
LOC103396980	1.55126e-23	1.32586	0.354	0.231	3.24478e-19	oocyte
prune1	1.79561e-23	1.22751	0.294	0.181	3.75588e-19	oocyte
ssr2	2.07342e-23	2.12601	0.487	0.366	4.33698e-19	oocyte
yif1b	2.19003e-23	2.40684	0.271	0.161	4.58088e-19	oocyte
cstf2	2.23626e-23	0.514258	0.28	0.167	4.67759e-19	oocyte
utp18	2.68365e-23	1.81282	0.29	0.176	5.61339e-19	oocyte
akip1	2.72815e-23	0.942359	0.27	0.164	5.70648e-19	oocyte
cnot10	3.86445e-23	0.561636	0.267	0.159	8.08326e-19	oocyte
LOC103396604	4.42109e-23	0.807405	0.409	0.287	9.24759e-19	oocyte
otub1	4.93144e-23	2.08434	0.385	0.267	1.03151e-18	oocyte
akr1a1	5.85905e-23	1.20118	0.288	0.179	1.22554e-18	oocyte
LOC103378134	6.00393e-23	0.891497	0.307	0.191	1.25584e-18	oocyte
amt	6.39364e-23	1.49342	0.278	0.164	1.33736e-18	oocyte
mrpl16	6.44346e-23	0.451323	0.281	0.17	1.34778e-18	oocyte
ccdc86	6.74816e-23	0.809137	0.35	0.229	1.41151e-18	oocyte
gtf2f2	8.42494e-23	1.06125	0.372	0.255	1.76225e-18	oocyte
LOC103384405	1.21932e-22	0.917145	0.328	0.214	2.55045e-18	oocyte
LOC103382559	1.39593e-22	0.54144	0.324	0.207	2.91986e-18	oocyte
cpsf4	1.94075e-22	1.08451	0.251	0.147	4.05947e-18	oocyte
ppid	2.79258e-22	0.786538	0.346	0.23	5.84124e-18	oocyte
shmt1	4.40516e-22	0.51817	0.289	0.181	9.21428e-18	oocyte
mrpl2	4.94947e-22	1.4634	0.3	0.188	1.03528e-17	oocyte
LOC103383573	5.39703e-22	4.68138	0.368	0.254	1.1289e-17	oocyte
vapa	7.39371e-22	0.390824	0.361	0.246	1.54654e-17	oocyte
spcs1	8.22642e-22	0.681585	0.404	0.289	1.72072e-17	oocyte
LOC103378870	8.9107e-22	0.668759	0.34	0.224	1.86385e-17	oocyte
jtb	3.6894e-21	0.725661	0.37	0.253	7.71711e-17	oocyte
c20h1orf123	4.27436e-21	1.25121	0.338	0.225	8.94069e-17	oocyte
nfyb	5.60365e-21	1.75539	0.496	0.379	1.17212e-16	oocyte
psmd14	6.33563e-21	0.350037	0.264	0.161	1.32522e-16	oocyte
sssca1	7.46872e-21	0.469236	0.359	0.245	1.56223e-16	oocyte
usp14	8.35883e-21	0.347361	0.295	0.187	1.74842e-16	oocyte
psme3	9.0468e-21	1.03353	0.475	0.359	1.89232e-16	oocyte
LOC103394932	9.21153e-21	0.397916	0.336	0.222	1.92678e-16	oocyte
neil1	1.19404e-20	0.627686	0.307	0.198	2.49757e-16	oocyte
clns1a	1.40105e-20	0.594608	0.395	0.282	2.93058e-16	oocyte
LOC103395958	1.53263e-20	1.2988	0.469	0.351	3.20581e-16	oocyte
LOC103388422	1.53809e-20	1.5444	0.477	0.358	3.21721e-16	oocyte
LOC103379533	1.88103e-20	0.973877	0.359	0.24	3.93455e-16	oocyte
mcm7	3.29843e-20	0.78252	0.43	0.311	6.89932e-16	oocyte
mrpl46	5.47041e-20	0.684965	0.264	0.161	1.14425e-15	oocyte
rtn4	5.5994e-20	1.40905	0.589	0.487	1.17123e-15	oocyte
eif4a3	6.50848e-20	4.58055	0.605	0.509	1.36138e-15	oocyte
mrpl37	9.06081e-20	0.311037	0.312	0.202	1.89525e-15	oocyte
psmb1	9.71543e-20	0.958996	0.388	0.279	2.03218e-15	oocyte
pinx1	1e-19	0.610219	0.289	0.184	2.0917e-15	oocyte
trub1	1.04052e-19	0.390124	0.283	0.178	2.17645e-15	oocyte
LOC103391457	1.4512e-19	3.40718	0.252	0.154	3.03548e-15	oocyte
kiaa0391	2.16136e-19	0.258006	0.283	0.178	4.52092e-15	oocyte
irak1bp1	3.62349e-19	1.0596	0.251	0.153	7.57926e-15	oocyte
ndufb10	4.93622e-19	2.3876	0.277	0.176	1.03251e-14	oocyte
cdpf1	5.72128e-19	0.715949	0.266	0.168	1.19672e-14	oocyte
orc3	6.59492e-19	0.318568	0.257	0.158	1.37946e-14	oocyte
LOC103385814	6.86526e-19	1.73515	0.546	0.452	1.43601e-14	oocyte
c6h11orf58	7.72587e-19	0.929255	0.347	0.24	1.61602e-14	oocyte
tma16	9.78149e-19	0.742795	0.32	0.212	2.04599e-14	oocyte
atp6ap2	1.83764e-18	0.915813	0.365	0.26	3.8438e-14	oocyte
LOC103396072	2.12316e-18	1.27387	0.469	0.368	4.44102e-14	oocyte
LOC103388825	2.45957e-18	0.281618	0.293	0.192	5.14468e-14	oocyte
txndc9	2.53596e-18	1.82567	0.423	0.311	5.30447e-14	oocyte
LOC103391498	3.58338e-18	0.698979	0.467	0.344	7.49535e-14	oocyte
LOC103389338	5.87331e-18	2.59524	0.264	0.167	1.22852e-13	oocyte
pdzd11	1.00975e-17	0.440374	0.269	0.173	2.1121e-13	oocyte
serf2	1.06437e-17	1.32786	0.496	0.388	2.22634e-13	oocyte
stip1	1.70223e-17	1.68014	0.366	0.264	3.56055e-13	oocyte
LOC103390067	1.91073e-17	0.530871	0.357	0.254	3.99667e-13	oocyte
btf3l4	2.05008e-17	1.69582	0.456	0.351	4.28816e-13	oocyte
tmco1	2.059e-17	0.920983	0.313	0.213	4.3068e-13	oocyte
rnps1	2.71547e-17	1.03884	0.465	0.361	5.67994e-13	oocyte
ndufab1	2.99874e-17	0.74983	0.477	0.37	6.27246e-13	oocyte
vps29	3.74032e-17	1.02644	0.331	0.232	7.82362e-13	oocyte
LOC103391289	4.46496e-17	0.62073	0.301	0.203	9.33935e-13	oocyte
mak16	6.72016e-17	0.907897	0.322	0.218	1.40566e-12	oocyte
LOC103380368	7.2221e-17	0.827461	0.293	0.197	1.51065e-12	oocyte
LOC103390448	9.04782e-17	0.630235	0.254	0.163	1.89253e-12	oocyte
tmem59	1.03498e-16	1.27764	0.453	0.352	2.16486e-12	oocyte
dctn3	2.01197e-16	0.336412	0.289	0.195	4.20845e-12	oocyte
rps6	2.28587e-16	10.3976	0.966	0.969	4.78134e-12	oocyte
LOC103377847	2.34359e-16	0.454599	0.255	0.164	4.90208e-12	oocyte
c5h19orf12	2.61995e-16	0.445043	0.271	0.178	5.48015e-12	oocyte
apex1	3.59255e-16	1.77091	0.407	0.304	7.51455e-12	oocyte
ndufs2	5.16612e-16	0.449529	0.257	0.168	1.0806e-11	oocyte
rwdd1	6.5859e-16	0.58362	0.282	0.189	1.37757e-11	oocyte
derl1	6.81881e-16	0.547796	0.262	0.174	1.42629e-11	oocyte
tmem205	7.69468e-16	1.01434	0.262	0.174	1.6095e-11	oocyte
skp1	9.58599e-16	2.20276	0.51	0.423	2.0051e-11	oocyte
pld6	2.05662e-15	3.70474	0.435	0.33	4.30184e-11	oocyte
draxin	2.51883e-15	0.255291	0.255	0.167	5.26864e-11	oocyte
ilf2	2.54804e-15	0.379219	0.357	0.256	5.32973e-11	oocyte
ngrn	4.59682e-15	1.28439	0.336	0.24	9.61516e-11	oocyte
LOC103389475	9.39477e-15	0.60207	0.306	0.215	1.9651e-10	oocyte
LOC103387369	1.05909e-14	1.63288	0.378	0.281	2.2153e-10	oocyte
trir	1.1349e-14	0.781244	0.413	0.315	2.37388e-10	oocyte
eif4ebp3	1.94662e-14	5.38804	0.388	0.293	4.07175e-10	oocyte
riox2	2.20324e-14	0.372	0.254	0.169	4.60852e-10	oocyte
ppih	2.36724e-14	1.006	0.281	0.194	4.95155e-10	oocyte
med31	3.1525e-14	0.75538	0.281	0.196	6.59408e-10	oocyte
psmg2	4.71186e-14	0.66203	0.274	0.189	9.85581e-10	oocyte
eny2	4.88194e-14	1.27808	0.324	0.232	1.02115e-09	oocyte
LOC103390630	5.0468e-14	12.3141	0.804	0.763	1.05564e-09	oocyte
nudt5	9.67041e-14	0.451233	0.258	0.175	2.02276e-09	oocyte
naa50	2.47345e-13	0.713901	0.304	0.218	5.17371e-09	oocyte
c11h12orf10	2.59494e-13	0.323528	0.281	0.195	5.42783e-09	oocyte
LOC103378456	3.24079e-13	0.510086	0.306	0.218	6.77876e-09	oocyte
tma7	3.40188e-13	2.04515	0.467	0.381	7.11572e-09	oocyte
LOC103394121	5.2191e-13	10.0915	0.539	0.462	1.09168e-08	oocyte
anapc16	1.09647e-12	1.47865	0.348	0.265	2.29348e-08	oocyte
ptges3	1.28662e-12	0.891296	0.432	0.339	2.69122e-08	oocyte
gemin2	1.64026e-12	0.433892	0.284	0.204	3.43093e-08	oocyte
LOC103397654	1.83136e-12	0.550402	0.387	0.295	3.83066e-08	oocyte
LOC103380240	2.8484e-12	0.316089	0.299	0.218	5.95799e-08	oocyte
nfkbil1	6.31201e-12	0.976099	0.263	0.181	1.32028e-07	oocyte
glul	1.84762e-11	0.284589	0.549	0.462	3.86467e-07	oocyte
eif6	7.10075e-11	0.897842	0.356	0.277	1.48526e-06	oocyte
rab10	8.7854e-11	0.424807	0.32	0.243	1.83764e-06	oocyte
LOC103379120	8.94444e-11	0.751263	0.252	0.179	1.87091e-06	oocyte
txnl4a	1.17634e-10	0.753356	0.303	0.23	2.46055e-06	oocyte
LOC103382167	1.20336e-10	0.296948	0.293	0.217	2.51707e-06	oocyte
LOC103390817	1.34908e-10	0.687287	0.255	0.183	2.82188e-06	oocyte
zpr1	1.49662e-10	0.256759	0.309	0.23	3.13048e-06	oocyte
cope	1.93306e-10	0.482243	0.303	0.226	4.04337e-06	oocyte
rcan1	2.35542e-10	0.324281	0.259	0.186	4.92684e-06	oocyte
c14h18orf32	3.02665e-10	1.18153	0.342	0.266	6.33084e-06	oocyte
tmem129	4.29677e-10	0.256643	0.261	0.189	8.98755e-06	oocyte
ndufs1	4.44483e-10	1.45138	0.299	0.228	9.29724e-06	oocyte
hypk	4.92683e-10	1.46729	0.345	0.267	1.03055e-05	oocyte
sdhb	5.04047e-10	0.331716	0.252	0.182	1.05432e-05	oocyte
LOC103386924	6.83201e-10	0.445139	0.551	0.477	1.42905e-05	oocyte
arl2	1.13997e-09	0.455531	0.257	0.191	2.38447e-05	oocyte
ddx52	1.64652e-09	1.79423	0.347	0.27	3.44403e-05	oocyte
psmc1	2.82898e-09	0.470993	0.289	0.219	5.91739e-05	oocyte
noc2l	3.1709e-09	0.645705	0.321	0.248	6.63257e-05	oocyte
LOC103382982	3.24926e-09	0.328713	0.368	0.292	6.79647e-05	oocyte
nop53	4.91854e-09	0.390085	0.472	0.389	0.000102881	oocyte
LOC103388354	6.51311e-09	1.00439	0.394	0.328	0.000136235	oocyte
edf1	6.68151e-09	0.390945	0.41	0.338	0.000139757	oocyte
LOC103393926	1.59559e-08	0.926871	0.342	0.276	0.00033375	oocyte
LOC103398423	2.01651e-08	0.34724	0.316	0.247	0.000421793	oocyte
ttc4	2.87221e-08	0.588194	0.255	0.193	0.00060078	oocyte
LOC103385145	4.11087e-08	0.318505	0.282	0.215	0.000859871	oocyte
LOC103396073	5.23552e-08	0.646565	0.304	0.232	0.00109511	oocyte
emc4	5.91004e-08	0.94169	0.258	0.2	0.0012362	oocyte
polr2f	1.96167e-07	2.05025	0.277	0.217	0.00410322	oocyte
LOC103390780	2.10684e-07	0.416047	0.279	0.221	0.00440688	oocyte
npepl1	2.14533e-07	0.515173	0.257	0.198	0.00448738	oocyte
LOC103380957	3.12625e-07	0.79725	0.309	0.251	0.00653918	oocyte
ube2i	3.66001e-07	0.257418	0.335	0.267	0.00765564	oocyte
LOC103391451	8.94446e-07	0.725123	0.222	0.28	0.0187091	oocyte
hint1	1.28763e-06	4.45029	0.544	0.506	0.0269333	oocyte
txlna	1.7424e-06	0.812204	0.366	0.303	0.0364458	oocyte

## Sheet: Follicle cell
Gene	p_val	avg_logFC	pct.1	pct.2	p_val_adj	cluster
LOC103384339	0	118.925	0.814	0.237	0	Follicle cell
LOC103384642	0	115.925	0.886	0.234	0	Follicle cell
LOC103390006	0	98.3726	0.909	0.382	0	Follicle cell
LOC103394544	0	90.5812	0.642	0.127	0	Follicle cell
prps2	0	87.9246	0.894	0.474	0	Follicle cell
inha	0	68.5967	0.808	0.293	0	Follicle cell
cd74	0	65.9246	0.966	0.567	0	Follicle cell
LOC103390401	0	51.4293	0.763	0.232	0	Follicle cell
LOC107989578	0	45.2285	0.763	0.11	0	Follicle cell
LOC103384973	0	35.9428	0.749	0.207	0	Follicle cell
sparc	0	35.9246	0.837	0.182	0	Follicle cell
LOC103397814	0	35.7804	0.645	0.101	0	Follicle cell
hsd17b1	0	33.9756	0.779	0.212	0	Follicle cell
foxl2	0	30.7434	0.76	0.164	0	Follicle cell
LOC103396079	0	29.9905	0.742	0.201	0	Follicle cell
LOC103381101	0	29.9246	0.693	0.093	0	Follicle cell
selenop	0	28.6114	0.872	0.189	0	Follicle cell
LOC103388965	0	27.1895	0.845	0.285	0	Follicle cell
col4a5	0	26.9141	0.707	0.161	0	Follicle cell
otor	0	26.1	0.42	0.033	0	Follicle cell
ahnak	0	25.196	0.677	0.066	0	Follicle cell
LOC103385314	0	24.6091	0.792	0.165	0	Follicle cell
colec11	0	24.5994	0.604	0.065	0	Follicle cell
LOC103392376	0	24.3268	0.679	0.093	0	Follicle cell
LOC103397629	0	22.0383	0.48	0.049	0	Follicle cell
LOC103386906	0	21.9559	0.861	0.245	0	Follicle cell
gata6	0	20.6252	0.77	0.092	0	Follicle cell
gapdh	0	19.8178	0.517	0.053	0	Follicle cell
LOC103394797	0	19.7688	0.64	0.091	0	Follicle cell
clu	0	17.9194	0.685	0.112	0	Follicle cell
LOC112487935	0	17.853	0.645	0.136	0	Follicle cell
LOC103396028	0	16.8815	0.639	0.061	0	Follicle cell
LOC103384641	0	16.593	0.6	0.069	0	Follicle cell
LOC103384837	0	15.8974	0.596	0.1	0	Follicle cell
LOC103387199	0	15.8508	0.622	0.115	0	Follicle cell
LOC103381019	0	14.3731	0.526	0.059	0	Follicle cell
slit1	0	14.0855	0.565	0.065	0	Follicle cell
smchd1	0	14.0027	0.596	0.084	0	Follicle cell
LOC103380158	0	13.3325	0.689	0.125	0	Follicle cell
plod1	0	13.2683	0.598	0.106	0	Follicle cell
LOC103394746	0	12.9917	0.578	0.055	0	Follicle cell
LOC103395641	0	12.7841	0.611	0.077	0	Follicle cell
aplp2	0	12.6042	0.703	0.085	0	Follicle cell
LOC103392424	0	12.3732	0.671	0.109	0	Follicle cell
LOC103387669	0	12.1564	0.674	0.126	0	Follicle cell
LOC103390710	0	12.1044	0.402	0.03	0	Follicle cell
LOC103383731	0	11.3851	0.486	0.041	0	Follicle cell
LOC103382600	0	11.0499	0.652	0.083	0	Follicle cell
LOC103383248	0	10.2971	0.56	0.053	0	Follicle cell
LOC103397689	0	10.1463	0.334	0.017	0	Follicle cell
tcf4	0	10.0499	0.484	0.05	0	Follicle cell
bcam	0	9.62841	0.678	0.078	0	Follicle cell
LOC103396056	0	9.32962	0.495	0.039	0	Follicle cell
tinagl1	0	9.32428	0.497	0.059	0	Follicle cell
LOC103389249	0	9.16036	0.468	0.052	0	Follicle cell
frmd6	0	9.09117	0.445	0.042	0	Follicle cell
LOC103386926	0	8.79599	0.546	0.056	0	Follicle cell
alpl	0	8.74956	0.681	0.085	0	Follicle cell
hopx	0	8.40017	0.564	0.087	0	Follicle cell
LOC103378762	0	8.33799	0.596	0.116	0	Follicle cell
LOC103396030	0	7.82491	0.404	0.024	0	Follicle cell
rnf144b	0	7.66643	0.563	0.081	0	Follicle cell
igf2	0	7.29667	0.413	0.026	0	Follicle cell
amh	0	7.13246	0.491	0.054	0	Follicle cell
maf	0	7.08149	0.472	0.058	0	Follicle cell
LOC103383541	0	6.94208	0.508	0.069	0	Follicle cell
LOC103386004	0	6.70161	0.384	0.029	0	Follicle cell
LOC103392505	0	6.45801	0.462	0.033	0	Follicle cell
LOC103393181	0	6.42319	0.409	0.025	0	Follicle cell
LOC103388285	0	6.22032	0.419	0.034	0	Follicle cell
emx2	0	6.11354	0.532	0.033	0	Follicle cell
dsp	0	6.05757	0.454	0.038	0	Follicle cell
LOC103377562	0	5.74738	0.499	0.038	0	Follicle cell
LOC103395392	0	5.67577	0.551	0.065	0	Follicle cell
LOC103386118	0	5.64755	0.44	0.043	0	Follicle cell
LOC103379758	0	5.52547	0.523	0.076	0	Follicle cell
LOC103380778	0	5.33868	0.421	0.032	0	Follicle cell
col4a6	0	5.1217	0.53	0.07	0	Follicle cell
LOC103390856	0	5.09064	0.521	0.055	0	Follicle cell
LOC103392788	0	4.98111	0.47	0.055	0	Follicle cell
LOC103396333	0	4.65776	0.432	0.043	0	Follicle cell
LOC103396588	0	4.60045	0.482	0.037	0	Follicle cell
cables1	0	4.55342	0.377	0.026	0	Follicle cell
c14h1orf115	0	3.97065	0.39	0.028	0	Follicle cell
metrn	0	3.94675	0.33	0.017	0	Follicle cell
LOC103376789	0	3.93091	0.398	0.037	0	Follicle cell
foxn3	0	3.9116	0.381	0.027	0	Follicle cell
itga3	0	3.90456	0.422	0.039	0	Follicle cell
LOC103390873	0	3.73717	0.363	0.022	0	Follicle cell
LOC103382566	0	2.94014	0.515	0.076	0	Follicle cell
LOC103392420	0	2.64905	0.331	0.017	0	Follicle cell
LOC103396334	0	2.19342	0.434	0.048	0	Follicle cell
fzd4	0	2.18214	0.309	0.015	0	Follicle cell
LOC103388266	0	2.175	0.346	0.017	0	Follicle cell
sema7a	0	2.17226	0.423	0.02	0	Follicle cell
LOC103394331	0	2.16237	0.358	0.018	0	Follicle cell
LOC103378690	0	1.82113	0.352	0.017	0	Follicle cell
sesn1	1.46e-305	6.28751	0.456	0.058	3.05387e-301	Follicle cell
LOC103394373	1.6088e-305	1.5936	0.525	0.086	3.36513e-301	Follicle cell
emilin2	8.17463e-305	4.03639	0.448	0.055	1.70989e-300	Follicle cell
nrarp	4.82309e-304	4.93778	0.459	0.059	1.00885e-299	Follicle cell
synpo	5.0926e-302	18.9932	0.334	0.022	1.06522e-297	Follicle cell
dab2	1.88133e-300	9.92282	0.636	0.149	3.93519e-296	Follicle cell
LOC103392743	4.79777e-300	25.0195	0.989	0.852	1.00355e-295	Follicle cell
slc45a4	1.14594e-294	3.89793	0.397	0.04	2.39697e-290	Follicle cell
2021-09-10	6.5113e-294	2.73273	0.413	0.045	1.36197e-289	Follicle cell
CYTB	2.99228e-293	9.92461	0.897	0.417	6.25895e-289	Follicle cell
LOC103384687	1.85831e-292	4.1135	0.399	0.041	3.88702e-288	Follicle cell
app	3.62208e-291	8.40748	0.681	0.181	7.57631e-287	Follicle cell
LOC103394530	3.47964e-289	2.41492	0.368	0.033	7.27837e-285	Follicle cell
LOC103380192	1.08478e-288	2.29123	0.352	0.028	2.26904e-284	Follicle cell
fmnl2	1.20701e-288	1.30825	0.283	0.012	2.5247e-284	Follicle cell
gas2	1.82254e-288	1.67593	0.326	0.022	3.81221e-284	Follicle cell
uhrf2	7.1142e-287	4.07425	0.404	0.044	1.48808e-282	Follicle cell
LOC103396029	1.04258e-286	50.9363	0.813	0.409	2.18076e-282	Follicle cell
LOC103382847	1.3979e-284	5.16626	0.37	0.034	2.92399e-280	Follicle cell
armh4	6.05404e-283	3.10859	0.297	0.016	1.26632e-278	Follicle cell
LOC103391597	6.25333e-283	6.97177	0.577	0.12	1.30801e-278	Follicle cell
LOC103389713	2.03222e-282	1.63803	0.317	0.021	4.2508e-278	Follicle cell
LOC103387818	1.10665e-279	2.65547	0.329	0.024	2.31479e-275	Follicle cell
lama5	6.90118e-279	4.71245	0.452	0.065	1.44352e-274	Follicle cell
LOC103389426	7.167e-279	7.61842	0.42	0.052	1.49912e-274	Follicle cell
sdc3	2.77504e-278	4.5896	0.52	0.094	5.80456e-274	Follicle cell
ntn4	4.09284e-278	2.26268	0.339	0.027	8.56098e-274	Follicle cell
calu	1.68816e-275	1.81198	0.351	0.031	3.53112e-271	Follicle cell
LOC103394973	2.99954e-273	2.89521	0.366	0.036	6.27414e-269	Follicle cell
nhsl2	1.2855e-268	1.39261	0.291	0.017	2.68887e-264	Follicle cell
LOC103381193	6.8915e-265	9.77626	0.38	0.042	1.4415e-260	Follicle cell
ND3	1.98501e-263	2.92576	0.656	0.17	4.15205e-259	Follicle cell
p3h2	4.28996e-262	5.5834	0.431	0.061	8.97332e-258	Follicle cell
LOC103395857	7.55637e-261	11.878	0.491	0.087	1.58057e-256	Follicle cell
LOC103383322	9.06498e-259	0.872792	0.274	0.015	1.89612e-254	Follicle cell
LOC103382882	5.61183e-258	7.34877	0.442	0.066	1.17383e-253	Follicle cell
znf536	1.28527e-257	1.65966	0.307	0.023	2.6884e-253	Follicle cell
LOC103386546	5.6011e-257	45.9246	0.991	0.921	1.17158e-252	Follicle cell
LOC103391216	3.22098e-256	25.921	0.969	0.769	6.73732e-252	Follicle cell
LOC103389755	7.49347e-256	1.32689	0.279	0.017	1.56741e-251	Follicle cell
pag1	7.84282e-256	3.83824	0.405	0.054	1.64048e-251	Follicle cell
LOC103386317	1.16166e-254	2.07154	0.348	0.035	2.42984e-250	Follicle cell
aldh1a2	1.18104e-254	2.35637	0.319	0.027	2.47038e-250	Follicle cell
pea15	2.10354e-251	2.03405	0.286	0.019	4.39997e-247	Follicle cell
LOC103387267	2.24605e-248	3.34605	0.499	0.096	4.69805e-244	Follicle cell
LOC103396420	4.28059e-247	1.69238	0.264	0.015	8.95371e-243	Follicle cell
phlpp2	4.54418e-247	1.86665	0.264	0.015	9.50507e-243	Follicle cell
LOC103377951	8.21491e-247	3.14969	0.319	0.029	1.71831e-242	Follicle cell
LOC103388483	4.5357e-246	1.08909	0.279	0.018	9.48732e-242	Follicle cell
ctgf	4.581e-245	8.64763	0.343	0.036	9.58207e-241	Follicle cell
cpn1	1.21134e-243	3.44566	0.328	0.032	2.53376e-239	Follicle cell
LOC103397501	1.29242e-241	1.76394	0.283	0.02	2.70336e-237	Follicle cell
LOC103396311	4.16173e-239	1.30207	0.262	0.016	8.70509e-235	Follicle cell
kif27	7.6473e-239	8.31908	0.27	0.018	1.59959e-234	Follicle cell
LOC103393318	8.29411e-238	1.45179	0.294	0.024	1.73488e-233	Follicle cell
LOC103391367	3.58013e-237	1.46117	0.306	0.027	7.48856e-233	Follicle cell
fras1	1.16044e-236	2.48711	0.259	0.015	2.4273e-232	Follicle cell
LOC103386397	6.80927e-236	1.78604	0.323	0.032	1.42429e-231	Follicle cell
LOC103381585	1.8583e-235	1.31191	0.279	0.02	3.887e-231	Follicle cell
efemp2	8.49768e-234	1.97232	0.291	0.024	1.77746e-229	Follicle cell
ND4	4.72424e-233	4.80412	0.699	0.227	9.88169e-229	Follicle cell
LOC103390150	1.60285e-231	1.3715	0.326	0.034	3.35268e-227	Follicle cell
LOC103393909	1.22293e-230	5.78664	0.438	0.075	2.55799e-226	Follicle cell
gpr146	1.11436e-228	1.63872	0.273	0.02	2.3309e-224	Follicle cell
creb3l2	3.2337e-227	1.26996	0.292	0.025	6.76392e-223	Follicle cell
LOC103381774	3.08591e-226	7.88859	0.542	0.13	6.4548e-222	Follicle cell
LOC103380713	1.82731e-225	2.98753	0.529	0.119	3.82219e-221	Follicle cell
LOC103387432	1.4688e-224	2.34225	0.45	0.081	3.07228e-220	Follicle cell
ptpn14	4.02253e-223	2.80716	0.32	0.034	8.41392e-219	Follicle cell
LOC103377596	1.42261e-221	3.02084	0.254	0.017	2.97567e-217	Follicle cell
LOC103393974	3.33682e-221	5.94194	0.392	0.06	6.97962e-217	Follicle cell
hes1	5.97386e-221	1.72597	0.257	0.018	1.24955e-216	Follicle cell
LOC103381660	4.66462e-220	81.7339	0.383	0.057	9.75699e-216	Follicle cell
LOC103389822	2.75021e-218	0.340787	0.274	0.022	5.75261e-214	Follicle cell
LOC103389739	3.38477e-217	0.770854	0.283	0.025	7.07993e-213	Follicle cell
ltbp3	8.47137e-217	0.915458	0.269	0.021	1.77196e-212	Follicle cell
LOC103396470	2.90298e-215	4.7697	0.516	0.117	6.07217e-211	Follicle cell
LOC103386003	2.96687e-213	1.59538	0.362	0.051	6.2058e-209	Follicle cell
itgb5	3.26051e-213	3.43901	0.386	0.06	6.82001e-209	Follicle cell
mme	6.59427e-213	9.28917	0.543	0.146	1.37932e-208	Follicle cell
nr0b1	2.29878e-212	1.45095	0.274	0.024	4.80836e-208	Follicle cell
LOC103378385	2.97568e-211	8.093	0.513	0.124	6.22423e-207	Follicle cell
arhgap24	1.73649e-209	1.18488	0.284	0.027	3.63222e-205	Follicle cell
LOC103385454	2.45155e-209	31.9247	0.881	0.45	5.1279e-205	Follicle cell
ak4	5.248e-209	1.40669	0.328	0.04	1.09772e-204	Follicle cell
plekhg4b	5.55933e-209	2.19607	0.322	0.039	1.16284e-204	Follicle cell
LOC103384301	2.27306e-208	13.959	0.333	0.042	4.75457e-204	Follicle cell
LOC103379795	5.02472e-208	6.18186	0.298	0.032	1.05102e-203	Follicle cell
LOC103394375	3.70093e-207	0.774646	0.255	0.02	7.74123e-203	Follicle cell
LOC103394954	9.37205e-207	2.42916	0.407	0.072	1.96035e-202	Follicle cell
LOC103388774	1.96992e-204	3.74995	0.35	0.049	4.12049e-200	Follicle cell
twsg1	2.21045e-204	2.35914	0.439	0.087	4.62361e-200	Follicle cell
psap	3.5326e-204	5.58472	0.795	0.395	7.38913e-200	Follicle cell
LOC103383402	2.86657e-203	1.63023	0.471	0.102	5.99601e-199	Follicle cell
LOC103376711	1.08165e-202	2.19967	0.387	0.064	2.26249e-198	Follicle cell
dap	4.58703e-202	3.53117	0.483	0.109	9.5947e-198	Follicle cell
zbtb20	4.39187e-199	3.17646	0.473	0.104	9.18648e-195	Follicle cell
LOC103394414	1.57051e-198	2.04344	0.475	0.106	3.28504e-194	Follicle cell
lrch4	6.54307e-198	3.70943	0.356	0.054	1.36861e-193	Follicle cell
znf704	1.34913e-197	1.39927	0.379	0.062	2.82197e-193	Follicle cell
srek1	3.12831e-194	2.0925	0.375	0.062	6.54348e-190	Follicle cell
LOC103386112	1.35796e-193	1.44191	0.254	0.022	2.84044e-189	Follicle cell
LOC103382659	1.00451e-191	1.52715	0.353	0.055	2.10114e-187	Follicle cell
gpatch8	8.53399e-187	6.99913	0.601	0.206	1.78505e-182	Follicle cell
LOC103394269	1.13029e-186	28.5902	0.967	0.848	2.36423e-182	Follicle cell
LOC103380283	3.50028e-184	0.993787	0.251	0.024	7.32153e-180	Follicle cell
LOC103398816	1.02351e-183	1.57055	0.309	0.041	2.14088e-179	Follicle cell
gpsm1	6.71315e-181	5.53657	0.401	0.082	1.40419e-176	Follicle cell
ccni	2.87007e-180	3.08795	0.473	0.115	6.00333e-176	Follicle cell
plp2	3.15069e-180	2.18415	0.451	0.104	6.59031e-176	Follicle cell
LOC103390493	1.87759e-179	4.261	0.366	0.065	3.92736e-175	Follicle cell
foxo1	1.02844e-178	1.39827	0.259	0.027	2.15118e-174	Follicle cell
card11	5.99176e-178	1.56217	0.32	0.048	1.2533e-173	Follicle cell
LOC103381464	1.96295e-177	2.55827	0.511	0.14	4.1059e-173	Follicle cell
LOC103388172	9.00818e-177	0.924286	0.254	0.026	1.88424e-172	Follicle cell
LOC103380157	3.41089e-176	1.3903	0.309	0.044	7.13456e-172	Follicle cell
LOC103379261	6.24296e-176	5.03206	0.384	0.074	1.30584e-171	Follicle cell
btg1	1.82031e-174	11.3474	0.813	0.474	3.80753e-170	Follicle cell
LOC103386518	9.03257e-174	1.90144	0.272	0.033	1.88934e-169	Follicle cell
smc3	1.31546e-173	4.75129	0.481	0.128	2.75154e-169	Follicle cell
LOC103385352	4.2291e-173	2.33486	0.301	0.042	8.84601e-169	Follicle cell
LOC103398175	1.19476e-172	2.0597	0.369	0.07	2.49907e-168	Follicle cell
LOC107988837	3.84782e-172	2.94387	0.417	0.091	8.04848e-168	Follicle cell
LOC103391298	7.69202e-172	1.0208	0.274	0.034	1.60894e-167	Follicle cell
LOC103388009	5.33311e-169	3.27473	0.283	0.038	1.11553e-164	Follicle cell
LOC103383207	2.82233e-167	4.01601	0.368	0.072	5.90346e-163	Follicle cell
LOC103383625	2.98209e-166	1.00964	0.275	0.036	6.23764e-162	Follicle cell
phf2	3.84843e-164	0.828522	0.254	0.029	8.04977e-160	Follicle cell
id3	4.48726e-164	3.44517	0.446	0.113	9.38601e-160	Follicle cell
s100a14	5.70729e-164	3.14269	0.631	0.242	1.19379e-159	Follicle cell
LOC103384389	5.32984e-163	1.66549	0.301	0.046	1.11484e-158	Follicle cell
LOC103388093	1.44468e-162	2.50378	0.543	0.173	3.02185e-158	Follicle cell
LOC103399907	1.52322e-162	2.6231	0.26	0.032	3.18613e-158	Follicle cell
LOC103388441	3.62661e-162	3.22547	0.392	0.086	7.58579e-158	Follicle cell
ivns1abp	3.10741e-160	2.45029	0.353	0.069	6.49976e-156	Follicle cell
aif1l	7.70169e-158	3.52002	0.399	0.091	1.61096e-153	Follicle cell
snx17	3.70301e-157	2.7586	0.333	0.061	7.74558e-153	Follicle cell
LOC103393035	6.07073e-157	3.14495	0.432	0.107	1.26981e-152	Follicle cell
ND5	1.65649e-156	4.0271	0.435	0.11	3.46489e-152	Follicle cell
man2c1	2.0189e-156	1.75267	0.327	0.059	4.22293e-152	Follicle cell
LOC103394545	5.15016e-153	4.58748	0.438	0.116	1.07726e-148	Follicle cell
fat1	8.76144e-153	2.61929	0.438	0.117	1.83263e-148	Follicle cell
map4	1.09152e-152	1.46099	0.33	0.061	2.28312e-148	Follicle cell
pbxip1	1.29983e-152	1.7911	0.334	0.063	2.71886e-148	Follicle cell
LOC103383617	2.88048e-152	0.954056	0.258	0.034	6.0251e-148	Follicle cell
cd82	6.98302e-151	1.36507	0.307	0.053	1.46064e-146	Follicle cell
LOC103383009	1.45136e-150	4.51112	0.328	0.061	3.03582e-146	Follicle cell
LOC103392930	1.70962e-150	1.1791	0.309	0.054	3.57601e-146	Follicle cell
crebzf	6.74348e-150	2.20396	0.435	0.115	1.41053e-145	Follicle cell
LOC103379307	2.10206e-149	1.20016	0.355	0.074	4.39687e-145	Follicle cell
pdcd6ip	3.58505e-149	2.48615	0.35	0.072	7.49884e-145	Follicle cell
agrn	4.4761e-147	2.40363	0.355	0.075	9.36266e-143	Follicle cell
rsrp1	1.41743e-146	5.68745	0.45	0.123	2.96485e-142	Follicle cell
LOC103379863	3.2949e-146	1.15677	0.428	0.109	6.89194e-142	Follicle cell
LOC103386308	9.30904e-146	4.21383	0.451	0.13	1.94717e-141	Follicle cell
golgb1	1.0531e-144	1.27146	0.268	0.04	2.20276e-140	Follicle cell
abi1	2.7159e-144	1.97438	0.373	0.084	5.68086e-140	Follicle cell
arap1	8.15713e-143	1.54144	0.396	0.098	1.70623e-138	Follicle cell
LOC103378630	2.31908e-142	3.95677	0.467	0.142	4.85082e-138	Follicle cell
zdhhc4	3.01111e-142	2.46846	0.363	0.081	6.29833e-138	Follicle cell
LOC103379030	9.10859e-142	2.70862	0.421	0.112	1.90524e-137	Follicle cell
LOC103388894	2.84325e-141	3.79708	0.489	0.159	5.94723e-137	Follicle cell
LOC103390031	3.70375e-141	1.80874	0.311	0.059	7.74714e-137	Follicle cell
sema3c	2.51122e-140	2.55961	0.357	0.081	5.25272e-136	Follicle cell
cxadr	4.33599e-140	1.39889	0.38	0.092	9.06959e-136	Follicle cell
csrp2	5.59754e-140	5.57049	0.374	0.087	1.17084e-135	Follicle cell
pgrmc1	1.13954e-138	3.97942	0.534	0.188	2.38358e-134	Follicle cell
itpkb	1.5246e-138	0.785516	0.255	0.037	3.18901e-134	Follicle cell
eif4a2	6.56386e-138	1.49302	0.391	0.098	1.37296e-133	Follicle cell
LOC103395363	2.31359e-135	5.58169	0.466	0.149	4.83934e-131	Follicle cell
LOC103392870	9.48662e-134	1.68784	0.305	0.059	1.98432e-129	Follicle cell
LOC103387977	2.03965e-133	0.828985	0.303	0.058	4.26634e-129	Follicle cell
tnrc18	5.28148e-133	2.38139	0.358	0.086	1.10473e-128	Follicle cell
LOC103396971	1.31465e-132	0.925255	0.452	0.136	2.74986e-128	Follicle cell
LOC103384300	3.85061e-132	0.696399	0.294	0.055	8.05433e-128	Follicle cell
LOC103383997	7.62102e-129	1.36137	0.279	0.051	1.59409e-124	Follicle cell
mfsd2a	1.14116e-128	1.67123	0.326	0.072	2.38696e-124	Follicle cell
LOC103378348	1.28913e-128	1.18314	0.339	0.076	2.69647e-124	Follicle cell
LOC103392273	7.74815e-128	1.20229	0.282	0.052	1.62068e-123	Follicle cell
ND2	1.13531e-126	8.14344	0.437	0.132	2.37474e-122	Follicle cell
pnrc2	2.24578e-126	7.60835	0.783	0.502	4.6975e-122	Follicle cell
znf318	3.04731e-125	0.919796	0.32	0.07	6.37406e-121	Follicle cell
mphosph8	7.9382e-125	1.7158	0.414	0.118	1.66043e-120	Follicle cell
rabac1	6.84732e-123	0.856404	0.261	0.046	1.43225e-118	Follicle cell
afdn	1.50543e-122	0.803648	0.251	0.042	3.14891e-118	Follicle cell
LOC103398911	8.98228e-121	3.75839	0.405	0.119	1.87882e-116	Follicle cell
dazap2	2.34378e-120	2.46655	0.459	0.153	4.90249e-116	Follicle cell
LOC103397133	2.73444e-120	3.24995	0.392	0.113	5.71962e-116	Follicle cell
rps29	3.03551e-120	68.2069	0.998	0.97	6.34938e-116	Follicle cell
LOC103397595	4.35433e-120	1.52318	0.392	0.111	9.10794e-116	Follicle cell
smarca2	8.68744e-120	1.55887	0.357	0.092	1.81715e-115	Follicle cell
LOC103389243	4.41354e-119	2.66033	0.541	0.218	9.2318e-115	Follicle cell
perp	7.51685e-119	2.12909	0.517	0.198	1.5723e-114	Follicle cell
LOC103380477	1.11136e-118	5.95543	0.417	0.131	2.32463e-114	Follicle cell
LOC103376752	1.48903e-118	1.45547	0.278	0.054	3.1146e-114	Follicle cell
hmgb1	2.35929e-118	9.16813	0.764	0.474	4.93493e-114	Follicle cell
LOC103388823	1.34773e-117	0.681122	0.252	0.045	2.81904e-113	Follicle cell
snrnp70	1.73759e-117	1.46654	0.356	0.092	3.63452e-113	Follicle cell
LOC103381118	2.11273e-117	1.42771	0.4	0.116	4.41919e-113	Follicle cell
LOC103392296	5.06682e-117	23.6833	0.981	0.925	1.05983e-112	Follicle cell
plscr3	2.97303e-115	1.22511	0.342	0.087	6.21869e-111	Follicle cell
LOC112486586	4.41923e-115	1.36654	0.318	0.074	9.24371e-111	Follicle cell
bmt2	6.65093e-115	1.40539	0.281	0.058	1.39117e-110	Follicle cell
sec62	6.50148e-114	0.921986	0.254	0.046	1.35992e-109	Follicle cell
LOC103395345	8.16151e-114	0.76033	0.275	0.056	1.70714e-109	Follicle cell
LOC103378835	8.39775e-114	1.54462	0.475	0.167	1.75656e-109	Follicle cell
LOC103392486	2.71313e-113	1.21542	0.27	0.054	5.67505e-109	Follicle cell
LOC103395807	5.65725e-113	1.99718	0.39	0.115	1.18333e-108	Follicle cell
LOC103392545	8.00085e-111	0.841211	0.284	0.061	1.67354e-106	Follicle cell
kiaa1549l	1.50298e-110	1.39719	0.263	0.052	3.14377e-106	Follicle cell
LOC103390182	1.80742e-108	1.24516	0.256	0.049	3.78059e-104	Follicle cell
rbm5	3.61946e-108	2.71194	0.53	0.222	7.57082e-104	Follicle cell
catl	5.34129e-108	5.17311	0.633	0.316	1.11724e-103	Follicle cell
sumo2	1.58527e-106	9.01477	0.303	0.073	3.3159e-102	Follicle cell
LOC103393684	6.47984e-106	0.567365	0.437	0.148	1.35539e-101	Follicle cell
LOC103386436	1.0576e-104	1.18982	0.391	0.122	2.21219e-100	Follicle cell
itgav	1.42217e-104	1.17704	0.319	0.081	2.97476e-100	Follicle cell
adamtsl5	4.82307e-104	1.39934	0.26	0.055	1.00884e-99	Follicle cell
LOC103386434	1.23335e-101	1.16993	0.322	0.085	2.5798e-97	Follicle cell
zmynd8	1.25074e-101	0.838908	0.284	0.066	2.61618e-97	Follicle cell
LOC103395528	4.3886e-101	0.843046	0.251	0.052	9.17963e-97	Follicle cell
rps15	9.68311e-101	13.9246	0.997	0.963	2.02542e-96	Follicle cell
cachd1	1.69586e-100	1.89056	0.27	0.061	3.54723e-96	Follicle cell
LOC103389920	8.64546e-99	1.07697	0.306	0.078	1.80837e-94	Follicle cell
elf4	1.5341e-98	1.521	0.39	0.122	3.20888e-94	Follicle cell
LOC103397662	2.57322e-98	6.92473	0.987	0.935	5.38241e-94	Follicle cell
ddx17	1.22888e-97	1.04783	0.274	0.064	2.57046e-93	Follicle cell
LOC103381207	4.47522e-97	1.33298	0.38	0.123	9.36081e-93	Follicle cell
ncor1	9.40263e-97	1.31971	0.313	0.084	1.96675e-92	Follicle cell
LOC103387550	1.36744e-96	15.9044	0.722	0.444	2.86028e-92	Follicle cell
pabpc1	4.61934e-95	1.07923	0.758	0.486	9.66228e-91	Follicle cell
sdf4	1.12379e-94	1.11311	0.297	0.077	2.35062e-90	Follicle cell
rps5	2.44856e-94	8.92247	0.993	0.972	5.12165e-90	Follicle cell
ttpa	4.75116e-94	0.937582	0.266	0.062	9.938e-90	Follicle cell
hdlbp	1.44352e-93	2.52218	0.6	0.306	3.01941e-89	Follicle cell
fau	2.95578e-93	5.92461	0.997	0.97	6.18261e-89	Follicle cell
p4ha1	3.16315e-93	5.8714	0.398	0.137	6.61636e-89	Follicle cell
myo1c	3.74763e-93	0.873028	0.252	0.057	7.83893e-89	Follicle cell
LOC103387376	6.32362e-93	1.08	0.358	0.112	1.32271e-88	Follicle cell
rps18	2.09089e-92	14.9065	0.999	0.981	4.37351e-88	Follicle cell
c18h6orf62	5.68517e-92	0.864548	0.281	0.071	1.18917e-87	Follicle cell
LOC103386057	1.04933e-91	1.43973	0.357	0.113	2.19488e-87	Follicle cell
micu1	1.25295e-91	1.3205	0.409	0.146	2.62079e-87	Follicle cell
ezh1	1.28537e-90	1.11829	0.269	0.065	2.68861e-86	Follicle cell
LOC103385498	1.72342e-90	1.91587	0.532	0.234	3.60488e-86	Follicle cell
LOC103394569	5.97791e-89	1.03311	0.299	0.082	1.2504e-84	Follicle cell
ddx21	8.57967e-89	3.34056	0.79	0.558	1.79461e-84	Follicle cell
LOC103394295	1.94824e-87	2.37206	0.263	0.066	4.07513e-83	Follicle cell
LOC103392037	2.77292e-87	2.28085	0.327	0.1	5.80011e-83	Follicle cell
LOC103394921	6.27271e-87	1.17116	0.273	0.071	1.31206e-82	Follicle cell
fam120c	1.74307e-86	2.2655	0.43	0.166	3.64598e-82	Follicle cell
aldh2	2.36921e-86	0.690421	0.321	0.096	4.95567e-82	Follicle cell
LOC103396514	3.41407e-86	1.08032	0.277	0.073	7.14121e-82	Follicle cell
aars	3.85717e-86	3.52617	0.462	0.196	8.06804e-82	Follicle cell
sf3b1	7.74914e-85	3.47384	0.565	0.284	1.62089e-80	Follicle cell
LOC103396312	2.69911e-83	0.69173	0.27	0.071	5.64573e-79	Follicle cell
ppib	8.42293e-83	12.1523	0.767	0.509	1.76182e-78	Follicle cell
nktr	1.22443e-81	0.983646	0.304	0.089	2.56114e-77	Follicle cell
eif4ebp2	2.70036e-81	0.991764	0.294	0.086	5.64835e-77	Follicle cell
cnn3	2.82931e-81	0.826293	0.332	0.106	5.91806e-77	Follicle cell
add1	3.13973e-81	0.611123	0.258	0.067	6.56736e-77	Follicle cell
cdh1	7.4163e-81	2.07712	0.443	0.183	1.55127e-76	Follicle cell
LOC103381466	1.1263e-80	1.29008	0.291	0.084	2.35589e-76	Follicle cell
LOC103388825	3.93162e-80	1.64452	0.44	0.178	8.22377e-76	Follicle cell
serinc1	6.9936e-80	2.11298	0.514	0.253	1.46285e-75	Follicle cell
pnisr	1.97975e-79	0.988105	0.343	0.115	4.14104e-75	Follicle cell
LOC103390166	3.34779e-79	0.759086	0.675	0.414	7.00258e-75	Follicle cell
LOC103377592	5.43614e-79	7.21915	0.785	0.55	1.13708e-74	Follicle cell
LOC107989597	7.60572e-79	0.633989	0.262	0.07	1.59089e-74	Follicle cell
LOC103382782	5.9576e-78	0.937516	0.344	0.117	1.24615e-73	Follicle cell
canx	1.13829e-77	9.2206	0.658	0.393	2.38097e-73	Follicle cell
rpl18a	1.44571e-76	2.92461	0.986	0.95	3.02398e-72	Follicle cell
rpl23	3.74325e-76	27.6137	0.987	0.972	7.82976e-72	Follicle cell
chmp2a	1.07086e-75	0.853226	0.364	0.132	2.23992e-71	Follicle cell
LOC103381306	3.19294e-75	0.620078	0.321	0.106	6.67867e-71	Follicle cell
bmpr2	4.59566e-74	0.695879	0.306	0.099	9.61275e-70	Follicle cell
apbb1	5.70373e-74	1.04137	0.297	0.094	1.19305e-69	Follicle cell
LOC103379801	6.44146e-74	1.86655	0.443	0.182	1.34736e-69	Follicle cell
LOC103387629	9.37896e-74	0.920084	0.277	0.083	1.9618e-69	Follicle cell
rps13	1.19337e-73	7.92461	0.985	0.951	2.49617e-69	Follicle cell
lgmn	1.23816e-73	0.675876	0.317	0.104	2.58985e-69	Follicle cell
mccc2	2.24739e-73	0.680662	0.301	0.095	4.70087e-69	Follicle cell
tax1bp1	5.30649e-72	2.15084	0.537	0.275	1.10996e-67	Follicle cell
sin3a	5.80685e-72	0.918354	0.274	0.082	1.21462e-67	Follicle cell
rps26	5.98653e-72	3.87601	0.997	0.979	1.2522e-67	Follicle cell
LOC103376746	1.95067e-71	6.28645	0.878	0.733	4.08022e-67	Follicle cell
slc39a13	5.35831e-71	1.59575	0.427	0.186	1.1208e-66	Follicle cell
LOC103380383	1.96909e-69	1.94614	0.268	0.082	4.11874e-65	Follicle cell
LOC103383278	4.32832e-69	1.18632	0.333	0.12	9.05354e-65	Follicle cell
LOC103392299	2.58075e-68	0.305239	0.261	0.078	5.39816e-64	Follicle cell
tspan3	5.82038e-67	2.11364	0.451	0.211	1.21745e-62	Follicle cell
LOC103398058	7.44334e-67	1.57372	0.285	0.092	1.55692e-62	Follicle cell
laptm4a	1.17292e-66	1.02436	0.396	0.164	2.4534e-62	Follicle cell
LOC103381345	1.78278e-66	0.714669	0.41	0.169	3.72903e-62	Follicle cell
LOC103388524	6.79384e-66	2.68316	0.405	0.178	1.42107e-61	Follicle cell
LOC103384228	1.13086e-65	0.731971	0.259	0.079	2.36543e-61	Follicle cell
leprot	1.48243e-65	0.630354	0.282	0.093	3.10081e-61	Follicle cell
rps9	3.24132e-65	19.9221	0.989	0.941	6.77987e-61	Follicle cell
LOC103394977	3.81316e-65	1.34212	0.452	0.21	7.976e-61	Follicle cell
LOC103385958	1.00395e-64	1.3827	0.459	0.217	2.09997e-60	Follicle cell
tmbim6	1.57641e-64	1.52236	0.521	0.273	3.29737e-60	Follicle cell
usp8	1.47221e-63	0.692746	0.258	0.08	3.07942e-59	Follicle cell
LOC103383498	6.60783e-62	1.02319	0.294	0.103	1.38216e-57	Follicle cell
csde1	2.15081e-61	1.003	0.393	0.175	4.49884e-57	Follicle cell
ubp1	5.42653e-61	1.38831	0.341	0.136	1.13507e-56	Follicle cell
jpt1	6.38977e-61	2.8416	0.47	0.235	1.33655e-56	Follicle cell
wls	7.10895e-59	0.480344	0.33	0.13	1.48698e-54	Follicle cell
tmem50a	3.97547e-58	0.941535	0.303	0.113	8.31548e-54	Follicle cell
cd302	4.01447e-58	0.680346	0.268	0.091	8.39706e-54	Follicle cell
arglu1	1.37823e-57	1.26251	0.437	0.212	2.88285e-53	Follicle cell
smg6	5.0967e-56	0.523462	0.259	0.088	1.06608e-51	Follicle cell
tmem109	5.7201e-56	3.39647	0.396	0.181	1.19647e-51	Follicle cell
apbb2	7.06877e-56	0.769772	0.261	0.091	1.47857e-51	Follicle cell
LOC103378514	2.20337e-55	0.490503	0.267	0.093	4.6088e-51	Follicle cell
ppp2r5a	3.72349e-54	0.706723	0.274	0.099	7.78843e-50	Follicle cell
LOC103399056	6.7235e-54	0.488004	0.289	0.106	1.40635e-49	Follicle cell
bclaf3	9.00589e-54	0.884741	0.279	0.102	1.88376e-49	Follicle cell
itm2a	1.09556e-53	0.519461	0.295	0.113	2.29158e-49	Follicle cell
LOC103397068	1.38837e-53	0.888236	0.322	0.132	2.90405e-49	Follicle cell
LOC103385975	2.62291e-53	1.61989	0.412	0.196	5.48635e-49	Follicle cell
LOC103383558	4.69304e-53	0.72619	0.319	0.13	9.81644e-49	Follicle cell
tmem14a	5.72691e-53	2.17837	0.346	0.148	1.1979e-48	Follicle cell
LOC103386946	1.15514e-52	0.848345	0.303	0.119	2.4162e-48	Follicle cell
sqstm1	1.50325e-52	1.36542	0.376	0.172	3.14434e-48	Follicle cell
rpl17	2.06907e-52	8.9237	0.989	0.949	4.32786e-48	Follicle cell
trip12	2.08033e-52	1.14879	0.343	0.147	4.35142e-48	Follicle cell
LOC103395914	7.5997e-52	1.58027	0.333	0.139	1.58963e-47	Follicle cell
LOC103383287	1.22652e-51	0.997693	0.552	0.323	2.56552e-47	Follicle cell
tbcb	2.97349e-51	1.47674	0.301	0.12	6.21964e-47	Follicle cell
LOC103384730	8.5163e-51	0.713873	0.282	0.107	1.78136e-46	Follicle cell
map1lc3a	2.35862e-50	0.634575	0.367	0.166	4.93353e-46	Follicle cell
aip	5.05534e-50	0.962814	0.322	0.136	1.05743e-45	Follicle cell
mon2	8.12782e-50	0.815988	0.303	0.122	1.7001e-45	Follicle cell
cltc	1.63735e-49	2.781	0.367	0.17	3.42485e-45	Follicle cell
sat1	1.40519e-48	1.3401	0.494	0.276	2.93923e-44	Follicle cell
mapk6	1.48406e-48	1.12522	0.28	0.108	3.10421e-44	Follicle cell
ddx46	3.8498e-48	3.26414	0.277	0.107	8.05264e-44	Follicle cell
hnrnpr	5.7634e-48	0.813316	0.345	0.155	1.20553e-43	Follicle cell
eif3a	6.00651e-48	1.92344	0.489	0.277	1.25638e-43	Follicle cell
LOC103385471	7.99192e-48	0.926196	0.301	0.123	1.67167e-43	Follicle cell
LOC103393535	1.03645e-47	0.499666	0.298	0.122	2.16794e-43	Follicle cell
tspan6	1.3714e-47	1.49634	0.389	0.186	2.86855e-43	Follicle cell
LOC103395328	1.3757e-47	0.899193	0.318	0.139	2.87756e-43	Follicle cell
LOC103377905	4.40471e-47	0.792929	0.268	0.104	9.21334e-43	Follicle cell
wsb1	4.91992e-47	0.667709	0.259	0.097	1.0291e-42	Follicle cell
dennd4c	7.97093e-47	0.606527	0.262	0.1	1.66728e-42	Follicle cell
LOC103391188	1.45691e-46	0.798426	0.299	0.125	3.04743e-42	Follicle cell
LOC103382906	1.79291e-46	1.30347	0.282	0.111	3.75024e-42	Follicle cell
srsf11	7.15512e-46	1.65412	0.484	0.279	1.49664e-41	Follicle cell
LOC103399858	2.14091e-45	1.4176	0.331	0.148	4.47815e-41	Follicle cell
tmed10	2.75476e-45	1.74398	0.402	0.202	5.76212e-41	Follicle cell
pdia3	3.14982e-45	0.891695	0.599	0.387	6.58848e-41	Follicle cell
LOC103381986	1.47666e-44	2.08397	0.437	0.239	3.08872e-40	Follicle cell
LOC103396529	1.64211e-44	0.943988	0.273	0.111	3.43479e-40	Follicle cell
ccpg1	1.67776e-44	0.641652	0.251	0.096	3.50937e-40	Follicle cell
u2surp	2.37847e-44	1.74145	0.435	0.236	4.97504e-40	Follicle cell
ufm1	6.2935e-44	1.54599	0.309	0.134	1.31641e-39	Follicle cell
lamp2	1.33237e-43	0.352201	0.284	0.118	2.78693e-39	Follicle cell
copa	1.70831e-43	0.74955	0.327	0.15	3.57327e-39	Follicle cell
ubtf	2.19675e-43	3.33813	0.527	0.326	4.59494e-39	Follicle cell
LOC103396750	5.90448e-43	0.748461	0.286	0.122	1.23504e-38	Follicle cell
ctnna1	8.74988e-43	1.15483	0.415	0.215	1.83021e-38	Follicle cell
gabarap	1.69762e-42	0.76181	0.515	0.308	3.55091e-38	Follicle cell
trib2	3.03485e-42	2.09164	0.329	0.158	6.348e-38	Follicle cell
LOC103392954	7.54786e-42	5.63726	0.352	0.174	1.57878e-37	Follicle cell
LOC103377197	1.07652e-41	0.628378	0.282	0.121	2.25176e-37	Follicle cell
stat3	1.47494e-41	0.772681	0.306	0.137	3.08513e-37	Follicle cell
cpsf6	2.18786e-41	1.01498	0.313	0.141	4.57634e-37	Follicle cell
supt6h	4.60537e-41	0.746191	0.28	0.12	9.63306e-37	Follicle cell
cadps2	8.53105e-41	1.81177	0.292	0.131	1.78444e-36	Follicle cell
LOC103385858	1.04208e-40	1.24593	0.383	0.198	2.17971e-36	Follicle cell
robo2	2.53198e-40	0.767942	0.302	0.136	5.29614e-36	Follicle cell
LOC103381366	2.78942e-40	2.99031	0.258	0.106	5.83462e-36	Follicle cell
LOC103396775	1.05923e-39	0.83706	0.361	0.185	2.2156e-35	Follicle cell
LOC103382031	2.22265e-39	0.798825	0.319	0.151	4.64911e-35	Follicle cell
LOC103397889	6.27378e-39	1.6014	0.431	0.238	1.31229e-34	Follicle cell
acbd7	4.00487e-38	1.85338	0.29	0.13	8.37698e-34	Follicle cell
nkap	6.82571e-38	0.701892	0.26	0.111	1.42773e-33	Follicle cell
luc7l3	8.1971e-38	0.520551	0.261	0.111	1.71459e-33	Follicle cell
ppt1	9.3531e-38	0.527514	0.306	0.14	1.95639e-33	Follicle cell
tnrc6a	5.43415e-37	2.90009	0.309	0.15	1.13666e-32	Follicle cell
LOC103385194	5.45453e-37	0.47819	0.316	0.151	1.14092e-32	Follicle cell
rsl24d1	6.71724e-37	0.957596	0.558	0.387	1.40504e-32	Follicle cell
snx12	8.35789e-37	0.666964	0.277	0.124	1.74822e-32	Follicle cell
syap1	1.07446e-36	0.72623	0.329	0.163	2.24746e-32	Follicle cell
fnbp4	1.21034e-36	0.573147	0.328	0.162	2.53167e-32	Follicle cell
2021-09-06	1.39536e-36	0.700002	0.277	0.124	2.91868e-32	Follicle cell
LOC103391292	1.42373e-36	0.511054	0.28	0.128	2.97802e-32	Follicle cell
srrm1	1.55572e-36	0.766578	0.401	0.219	3.25409e-32	Follicle cell
golga2	1.7195e-36	0.644606	0.251	0.105	3.59667e-32	Follicle cell
LOC103393631	5.67604e-36	0.758936	0.313	0.154	1.18726e-31	Follicle cell
kmt2d	1.13185e-35	1.20702	0.327	0.164	2.36748e-31	Follicle cell
LOC103384708	1.41131e-35	3.04034	0.494	0.313	2.95205e-31	Follicle cell
LOC103380169	1.58178e-35	0.591293	0.362	0.19	3.3086e-31	Follicle cell
LOC103385808	2.06594e-35	0.931087	0.503	0.315	4.32132e-31	Follicle cell
LOC103388655	2.39277e-35	0.920538	0.369	0.198	5.00495e-31	Follicle cell
LOC103379409	2.83031e-35	0.765552	0.425	0.248	5.92015e-31	Follicle cell
LOC103395942	6.02198e-35	6.36255	0.439	0.26	1.25962e-30	Follicle cell
LOC103388869	1.01342e-34	2.12184	0.336	0.173	2.11977e-30	Follicle cell
LOC103385723	1.02659e-34	2.92327	0.313	0.154	2.14731e-30	Follicle cell
ndfip2	1.22736e-34	0.853884	0.315	0.156	2.56726e-30	Follicle cell
LOC107988390	1.94447e-34	2.96609	0.262	0.116	4.06725e-30	Follicle cell
pigq	2.69113e-34	0.40075	0.273	0.125	5.62903e-30	Follicle cell
kpna4	2.80117e-34	0.729829	0.32	0.159	5.85921e-30	Follicle cell
ndrg2	3.45125e-34	2.18285	0.262	0.119	7.21898e-30	Follicle cell
atrx	7.73488e-34	1.9265	0.299	0.146	1.61791e-29	Follicle cell
rpl7	1.2319e-33	8.92089	0.996	0.98	2.57677e-29	Follicle cell
LOC103385138	1.31442e-33	1.07822	0.333	0.17	2.74938e-29	Follicle cell
srcap	1.60474e-33	0.890273	0.278	0.13	3.35664e-29	Follicle cell
eif3m	1.98196e-33	3.88343	0.654	0.495	4.14567e-29	Follicle cell
LOC103396595	2.70938e-33	0.833369	0.398	0.229	5.66721e-29	Follicle cell
LOC103379037	2.9557e-33	1.39627	0.472	0.291	6.18243e-29	Follicle cell
LOC103389570	3.54574e-33	0.577978	0.401	0.227	7.41663e-29	Follicle cell
LOC103385488	3.99088e-33	0.966431	0.211	0.408	8.34772e-29	Follicle cell
gspt1	5.91822e-33	0.757519	0.489	0.304	1.23791e-28	Follicle cell
LOC103386207	1.27385e-32	3.36689	0.364	0.201	2.6645e-28	Follicle cell
2021-03-08	1.67931e-32	0.573572	0.328	0.17	3.51262e-28	Follicle cell
capns1	1.86017e-32	0.881332	0.408	0.238	3.89092e-28	Follicle cell
chmp1b	1.86028e-32	0.700534	0.304	0.152	3.89114e-28	Follicle cell
zfp36l1	2.16819e-32	9.00143	0.529	0.357	4.5352e-28	Follicle cell
tmed9	2.47134e-32	0.826384	0.428	0.256	5.1693e-28	Follicle cell
LOC103391020	3.41894e-32	0.717511	0.338	0.178	7.1514e-28	Follicle cell
LOC103395883	3.87352e-32	2.65424	0.574	0.393	8.10225e-28	Follicle cell
csnk1a1	1.11146e-31	0.432964	0.36	0.195	2.32485e-27	Follicle cell
mphosph6	1.40382e-31	2.02793	0.184	0.378	2.93637e-27	Follicle cell
LOC103395492	2.7937e-31	3.05575	0.281	0.138	5.84357e-27	Follicle cell
cdc37	2.92609e-31	0.79249	0.38	0.213	6.12051e-27	Follicle cell
cdca3	2.95514e-31	0.996744	0.207	0.39	6.18126e-27	Follicle cell
kmt2b	7.77785e-31	1.01255	0.281	0.138	1.62689e-26	Follicle cell
serf2	1.0421e-30	0.871502	0.564	0.387	2.17977e-26	Follicle cell
LOC103384807	1.39165e-30	0.817345	0.328	0.174	2.91091e-26	Follicle cell
LOC103388701	1.50973e-30	2.00553	0.516	0.362	3.15791e-26	Follicle cell
glyr1	1.57094e-30	0.741143	0.358	0.201	3.28593e-26	Follicle cell
tmed2	2.05197e-30	1.24449	0.364	0.205	4.29212e-26	Follicle cell
LOC103378680	8.22983e-30	0.422525	0.256	0.122	1.72143e-25	Follicle cell
serpine2	2.47686e-29	9.55679	0.338	0.186	5.18084e-25	Follicle cell
thoc2	2.74769e-29	0.700222	0.334	0.181	5.74735e-25	Follicle cell
tpd52l2	7.14873e-29	0.786297	0.321	0.171	1.4953e-24	Follicle cell
LOC103379911	2.05931e-28	15.6603	0.214	0.396	4.30746e-24	Follicle cell
LOC103379975	2.57481e-28	0.998014	0.318	0.171	5.38574e-24	Follicle cell
LOC103382271	3.46864e-28	2.37886	0.42	0.26	7.25535e-24	Follicle cell
morc3	1.72427e-27	0.769624	0.331	0.184	3.60666e-23	Follicle cell
LOC103380368	2.35236e-27	0.518392	0.349	0.197	4.92044e-23	Follicle cell
LOC103394214	1.03339e-26	3.51404	0.372	0.218	2.16155e-22	Follicle cell
LOC103396108	2.08543e-26	0.27699	0.278	0.142	4.36209e-22	Follicle cell
hells	3.43979e-26	0.955294	0.393	0.239	7.195e-22	Follicle cell
ktn1	7.08298e-26	0.5387	0.339	0.192	1.48155e-21	Follicle cell
LOC103396557	1.22206e-25	0.794789	0.268	0.139	2.55618e-21	Follicle cell
LOC103391236	1.91233e-25	0.852693	0.402	0.251	4.00001e-21	Follicle cell
srsf7	2.58067e-25	0.291796	0.364	0.213	5.39799e-21	Follicle cell
LOC103382358	2.84776e-25	0.279896	0.318	0.176	5.95666e-21	Follicle cell
spcs1	2.06936e-24	1.64882	0.445	0.292	4.32847e-20	Follicle cell
LOC103393291	3.72277e-24	0.483438	0.295	0.163	7.78691e-20	Follicle cell
capzb	8.72997e-24	1.231	0.334	0.194	1.82605e-19	Follicle cell
ddost	1.16955e-23	1.16954	0.363	0.216	2.44635e-19	Follicle cell
sfpq	1.26332e-23	1.27388	0.362	0.219	2.64248e-19	Follicle cell
nap1l1	2.70824e-23	1.21537	0.519	0.365	5.66482e-19	Follicle cell
rab2a	7.23653e-23	0.745021	0.319	0.184	1.51366e-18	Follicle cell
cope	7.30704e-23	0.782443	0.362	0.224	1.52841e-18	Follicle cell
ddx42	7.46955e-23	0.490401	0.282	0.155	1.56241e-18	Follicle cell
ctnnb1	8.12207e-23	0.53445	0.309	0.174	1.69889e-18	Follicle cell
LOC112488424	9.54464e-23	0.67	0.307	0.178	1.99645e-18	Follicle cell
LOC103390580	1.18725e-22	0.5109	0.304	0.171	2.48336e-18	Follicle cell
glul	1.40376e-22	0.363637	0.353	0.498	2.93625e-18	Follicle cell
LOC103396169	3.44501e-22	0.625931	0.259	0.14	7.20593e-18	Follicle cell
eif5a	3.84092e-22	0.492843	0.274	0.15	8.03405e-18	Follicle cell
zmat2	4.85995e-22	0.619805	0.342	0.206	1.01656e-17	Follicle cell
ckap2	6.35864e-22	2.86391	0.145	0.292	1.33004e-17	Follicle cell
LOC103391805	1.39828e-21	0.545665	0.254	0.135	2.92479e-17	Follicle cell
ddx23	2.40961e-21	0.421725	0.309	0.18	5.04018e-17	Follicle cell
iscu	2.63398e-21	1.12363	0.494	0.348	5.5095e-17	Follicle cell
LOC103384347	2.85384e-21	0.310148	0.346	0.21	5.96938e-17	Follicle cell
hmgxb4	3.35546e-21	0.338758	0.273	0.149	7.01861e-17	Follicle cell
LOC103379009	3.84014e-21	1.29272	0.621	0.713	8.03243e-17	Follicle cell
cad	4.38903e-21	0.384376	0.251	0.136	9.18054e-17	Follicle cell
LOC103379958	7.76856e-21	0.585116	0.272	0.15	1.62495e-16	Follicle cell
arcn1	1.83099e-20	0.320624	0.254	0.139	3.82988e-16	Follicle cell
LOC103394560	2.02328e-20	6.64549	0.274	0.151	4.23209e-16	Follicle cell
LOC103397769	2.84169e-20	2.64609	0.984	0.96	5.94397e-16	Follicle cell
LOC103386453	4.17647e-20	0.505178	0.278	0.16	8.73592e-16	Follicle cell
LOC103381975	5.17864e-20	0.834806	0.536	0.381	1.08322e-15	Follicle cell
LOC103377343	1.59897e-19	0.402315	0.289	0.168	3.34456e-15	Follicle cell
LOC103386454	2.468e-19	0.712584	0.339	0.213	5.16232e-15	Follicle cell
lancl1	8.35642e-19	0.986981	0.383	0.255	1.74791e-14	Follicle cell
idh2	8.54699e-19	2.97952	0.4	0.275	1.78777e-14	Follicle cell
LOC103385371	2.51723e-18	0.807631	0.295	0.179	5.26528e-14	Follicle cell
LOC103389110	2.91093e-18	0.79383	0.261	0.15	6.08879e-14	Follicle cell
ap2m1	4.10157e-18	0.543231	0.374	0.245	8.57925e-14	Follicle cell
LOC103379916	6.00754e-18	0.814388	0.268	0.156	1.2566e-13	Follicle cell
neu1	7.49157e-18	1.27479	0.341	0.219	1.56701e-13	Follicle cell
spcs2	7.49202e-18	0.593422	0.396	0.27	1.56711e-13	Follicle cell
LOC103379965	1.22485e-17	1.26473	0.434	0.309	2.56202e-13	Follicle cell
LOC103377409	1.78443e-17	0.609826	0.46	0.328	3.73249e-13	Follicle cell
nudt5	2.44605e-17	0.553554	0.291	0.177	5.1164e-13	Follicle cell
LOC103398966	6.80373e-16	1.49089	0.327	0.212	1.42314e-11	Follicle cell
LOC103376735	6.89281e-16	0.573238	0.323	0.21	1.44177e-11	Follicle cell
lzic	8.12301e-16	0.52088	0.275	0.167	1.69909e-11	Follicle cell
LOC103379383	1.39852e-15	1.17858	0.283	0.177	2.92527e-11	Follicle cell
LOC103395958	1.88216e-15	1.04567	0.485	0.358	3.93692e-11	Follicle cell
park7	2.55882e-15	0.718303	0.262	0.16	5.35228e-11	Follicle cell
LOC103397790	2.67827e-15	4.66577	0.257	0.158	5.60215e-11	Follicle cell
LOC103379063	4.01548e-15	0.566242	0.279	0.17	8.39917e-11	Follicle cell
wasf2	4.61665e-15	0.62367	0.264	0.162	9.65665e-11	Follicle cell
stat1	5.24007e-15	5.65721	0.293	0.185	1.09607e-10	Follicle cell
rnf213	6.70436e-15	20.8758	0.383	0.24	1.40235e-10	Follicle cell
LOC103394439	6.97542e-15	0.674774	0.293	0.19	1.45905e-10	Follicle cell
bloc1s1	2.48177e-14	0.265173	0.272	0.17	5.19111e-10	Follicle cell
nucks1	2.7432e-14	0.384841	0.343	0.231	5.73795e-10	Follicle cell
tmbim4	3.24359e-14	0.799484	0.302	0.198	6.78462e-10	Follicle cell
pnn	3.88129e-14	0.582258	0.271	0.172	8.1185e-10	Follicle cell
LOC103398620	8.09274e-14	0.302817	0.263	0.165	1.69276e-09	Follicle cell
LOC103389168	8.53215e-14	0.455912	0.327	0.222	1.78467e-09	Follicle cell
sart1	1.16588e-13	0.251256	0.384	0.268	2.43868e-09	Follicle cell
snd1	1.17517e-13	0.289213	0.273	0.173	2.45809e-09	Follicle cell
vps29	1.25935e-13	0.289423	0.346	0.237	2.63419e-09	Follicle cell
larp1	2.50474e-13	0.311197	0.28	0.181	5.23916e-09	Follicle cell
ssr3	3.86009e-13	1.27392	0.504	0.39	8.07416e-09	Follicle cell
supt5h	3.99155e-13	0.765442	0.258	0.163	8.34912e-09	Follicle cell
LOC103385642	6.52743e-13	0.430798	0.281	0.185	1.36534e-08	Follicle cell
LOC103398401	7.15426e-13	0.627314	0.292	0.193	1.49646e-08	Follicle cell
fscn1	8.24603e-13	1.3211	0.334	0.229	1.72482e-08	Follicle cell
id1	9.58868e-13	11.7875	0.461	0.358	2.00566e-08	Follicle cell
LOC103394064	4.41634e-12	0.686708	0.458	0.353	9.23766e-08	Follicle cell
oaz1	5.65833e-12	2.13586	0.483	0.372	1.18355e-07	Follicle cell
LOC103392679	8.38509e-12	0.552867	0.362	0.262	1.75391e-07	Follicle cell
cyfip1	1.04013e-11	0.271934	0.282	0.188	2.17565e-07	Follicle cell
caprin1	1.32104e-11	0.834344	0.342	0.248	2.76322e-07	Follicle cell
LOC103380233	4.04243e-11	1.91493	0.511	0.396	8.45556e-07	Follicle cell
LOC103390067	5.2189e-11	0.626405	0.356	0.262	1.09164e-06	Follicle cell
oard1	5.35589e-10	0.262585	0.275	0.19	1.12029e-05	Follicle cell
srsf5	5.53302e-10	1.01655	0.342	0.255	1.15734e-05	Follicle cell
LOC103393176	5.91922e-10	0.42332	0.391	0.295	1.23812e-05	Follicle cell
edf1	9.77539e-10	0.473407	0.434	0.341	2.04472e-05	Follicle cell
pin4	1.38746e-09	0.784188	0.314	0.227	2.90216e-05	Follicle cell
LOC103384405	1.63288e-09	0.402985	0.311	0.226	3.41549e-05	Follicle cell
st13	2.10038e-09	0.268851	0.297	0.214	4.39337e-05	Follicle cell
LOC103398772	2.52834e-09	0.290377	0.311	0.221	5.28853e-05	Follicle cell
LOC112486955	2.69795e-09	2.20119	0.532	0.422	5.64329e-05	Follicle cell
LOC103392690	3.15915e-09	0.660541	0.27	0.191	6.60799e-05	Follicle cell
LOC103391930	5.38781e-09	0.366779	0.395	0.301	0.000112697	Follicle cell
trim25	8.77817e-09	0.30737	0.309	0.225	0.000183613	Follicle cell
imp3	3.46314e-08	4.43976	0.246	0.327	0.000724384	Follicle cell
pes1	6.3095e-08	0.735322	0.26	0.186	0.00131976	Follicle cell
mrps18b	7.20243e-08	5.73732	0.275	0.353	0.00150653	Follicle cell
LOC103392749	1.61562e-07	1.15839	0.252	0.183	0.00337939	Follicle cell
chd7	1.92351e-07	0.815976	0.387	0.307	0.0040234	Follicle cell
LOC103388544	2.00725e-07	2.22978	0.414	0.341	0.00419857	Follicle cell
cct6a	4.28848e-07	0.871409	0.353	0.278	0.0089702	Follicle cell
fbl	5.58195e-07	3.2267	0.249	0.333	0.0116758	Follicle cell
ubb	6.21546e-07	0.979837	0.545	0.475	0.0130009	Follicle cell
eif4h	7.41481e-07	0.379208	0.286	0.214	0.0155096	Follicle cell
hnrnpm	1.03785e-06	0.657796	0.338	0.272	0.0217087	Follicle cell
psmc1	1.16302e-06	0.264521	0.293	0.224	0.0243268	Follicle cell

## Sheet: Endothelial_cell
Gene	p_val	avg_logFC	pct.1	pct.2	p_val_adj	cluster
gng10	0	6.00244	0.342	0.003	0	Endothelial_cell
LOC103382230	8.48811e-274	4.72586	0.289	0.002	1.77546e-269	Endothelial_cell
ltbp4	1.57249e-239	4.11267	0.289	0.003	3.28917e-235	Endothelial_cell
LOC103379870	9.24157e-239	17.6558	0.303	0.003	1.93306e-234	Endothelial_cell
LOC103378592	6.06153e-230	17.6593	0.368	0.006	1.26789e-225	Endothelial_cell
kdr	1.68091e-218	8.99338	0.276	0.003	3.51596e-214	Endothelial_cell
LOC103378692	2.8467e-204	20.7847	0.342	0.006	5.95444e-200	Endothelial_cell
adgrl4	5.34767e-193	7.65986	0.263	0.003	1.11857e-188	Endothelial_cell
egfl7	2.36542e-153	10.9973	0.276	0.005	4.94775e-149	Endothelial_cell
LOC103395864	6.81453e-144	39.6485	0.303	0.007	1.42539e-139	Endothelial_cell
ushbp1	3.74065e-138	1.70077	0.263	0.005	7.82432e-134	Endothelial_cell
LOC103393152	1.3628e-135	12.9951	0.382	0.013	2.85058e-131	Endothelial_cell
fli1	1.67823e-135	9.84809	0.382	0.013	3.51036e-131	Endothelial_cell
LOC103393154	4.40714e-132	10.382	0.461	0.021	9.21842e-128	Endothelial_cell
LOC103395010	1.35654e-120	22.6449	0.342	0.012	2.83748e-116	Endothelial_cell
LOC103389932	3.40262e-115	8.09272	0.355	0.014	7.11726e-111	Endothelial_cell
LOC103383364	1.8753e-114	74.5409	0.355	0.014	3.92256e-110	Endothelial_cell
LOC103383943	1.17879e-110	1.60544	0.263	0.007	2.46568e-106	Endothelial_cell
apln	5.24916e-106	12.6732	0.276	0.009	1.09797e-101	Endothelial_cell
myh11	7.55302e-106	13.6218	0.382	0.018	1.57987e-101	Endothelial_cell
LOC103381978	1.72973e-103	7.81247	0.395	0.02	3.61807e-99	Endothelial_cell
flt3	1.26587e-96	19.718	0.276	0.01	2.64782e-92	Endothelial_cell
LOC103394339	1.75384e-78	0.570763	0.526	0.049	3.66851e-74	Endothelial_cell
LOC103377019	6.84555e-76	1.03435	0.289	0.014	1.43188e-71	Endothelial_cell
LOC103379385	2.33212e-75	3.24816	0.289	0.014	4.87809e-71	Endothelial_cell
LOC103397617	6.81197e-73	247.482	0.342	0.022	1.42486e-68	Endothelial_cell
LOC103377845	3.07873e-72	1.22672	0.368	0.025	6.43978e-68	Endothelial_cell
LOC103397612	2.79044e-71	26.6824	0.395	0.03	5.83676e-67	Endothelial_cell
LOC103378347	7.09514e-69	2.20582	0.263	0.013	1.48409e-64	Endothelial_cell
LOC103394520	1.22546e-68	59.3438	0.447	0.04	2.5633e-64	Endothelial_cell
LOC103380539	1.05613e-67	6.53666	0.487	0.047	2.20911e-63	Endothelial_cell
LOC103381839	3.45878e-67	19.5276	0.303	0.018	7.23472e-63	Endothelial_cell
LOC112487835	3.37709e-66	17.6655	0.289	0.017	7.06385e-62	Endothelial_cell
LOC103392140	5.97271e-57	16.6625	0.289	0.02	1.24931e-52	Endothelial_cell
LOC103381292	8.2183e-53	6.94084	0.263	0.018	1.71902e-48	Endothelial_cell
LOC103382499	1.81118e-51	5.9953	0.289	0.022	3.78845e-47	Endothelial_cell
vim	8.2862e-51	0.77897	0.263	0.018	1.73322e-46	Endothelial_cell
LOC103386813	1.52902e-50	6.38008	0.408	0.045	3.19824e-46	Endothelial_cell
LOC103394348	3.28288e-48	10.0779	0.553	0.087	6.86681e-44	Endothelial_cell
LOC103393212	3.55111e-48	4.21724	0.316	0.028	7.42785e-44	Endothelial_cell
LOC103383556	3.10491e-46	1.49451	0.289	0.024	6.49454e-42	Endothelial_cell
itgb2	5.54196e-45	3.60764	0.658	0.133	1.15921e-40	Endothelial_cell
LOC103391155	1.61581e-43	7.43393	0.316	0.032	3.37979e-39	Endothelial_cell
LOC103395660	1.76421e-42	2.54194	0.539	0.092	3.6902e-38	Endothelial_cell
LOC103385895	2.64793e-41	1.95232	0.368	0.043	5.53867e-37	Endothelial_cell
spred1	3.94881e-41	0.374004	0.303	0.03	8.25972e-37	Endothelial_cell
tmsb4x	5.55784e-41	65.5375	0.961	0.471	1.16253e-36	Endothelial_cell
plek	1.18805e-38	3.55408	0.289	0.029	2.48504e-34	Endothelial_cell
fermt3	2.37002e-38	1.98414	0.316	0.035	4.95736e-34	Endothelial_cell
LOC103388661	1.08604e-37	5.21608	0.316	0.036	2.27167e-33	Endothelial_cell
arpc1b	1.13335e-37	1.89786	0.816	0.24	2.37062e-33	Endothelial_cell
LOC103389152	5.64686e-37	5.90594	0.303	0.034	1.18115e-32	Endothelial_cell
LOC103388835	5.37742e-36	1.01866	0.276	0.028	1.12479e-31	Endothelial_cell
syk	9.90837e-36	15.0452	0.329	0.04	2.07253e-31	Endothelial_cell
LOC103391262	2.4185e-35	3.68367	0.382	0.055	5.05877e-31	Endothelial_cell
LOC103389901	4.8109e-35	0.9556	0.276	0.029	1.0063e-30	Endothelial_cell
LOC103395541	5.24666e-35	0.491398	0.263	0.026	1.09744e-30	Endothelial_cell
pik3cd	6.00802e-34	2.96369	0.342	0.046	1.2567e-29	Endothelial_cell
LOC103395669	6.61083e-33	7.81644	0.434	0.076	1.38279e-28	Endothelial_cell
tpm4	1.39804e-32	12.256	0.566	0.13	2.92428e-28	Endothelial_cell
LOC103394920	1.72347e-32	1.09016	0.289	0.034	3.60499e-28	Endothelial_cell
COX2	2.68167e-32	45.4106	0.961	0.468	5.60926e-28	Endothelial_cell
LOC103383494	1.71443e-31	5.55653	0.934	0.556	3.58606e-27	Endothelial_cell
anxa1	1.51897e-30	13.5967	0.342	0.051	3.17722e-26	Endothelial_cell
tln1	3.48739e-30	15.7802	0.645	0.197	7.29457e-26	Endothelial_cell
ND3	3.55732e-30	3.53285	0.75	0.226	7.44085e-26	Endothelial_cell
LOC103393684	9.56981e-30	4.62733	0.632	0.18	2.00172e-25	Endothelial_cell
myof	2.59877e-28	0.967781	0.263	0.032	5.43584e-24	Endothelial_cell
LOC103395876	2.64961e-28	25.2676	0.447	0.092	5.54219e-24	Endothelial_cell
LOC103393823	2.80993e-28	12.5882	0.289	0.04	5.87754e-24	Endothelial_cell
LOC103395314	1.98535e-27	5.26617	0.513	0.122	4.15276e-23	Endothelial_cell
COX3	2.46768e-27	59.5193	0.987	0.666	5.16164e-23	Endothelial_cell
sh3bgrl	4.73638e-27	1.31476	0.487	0.109	9.90708e-23	Endothelial_cell
ehd2	6.62431e-27	6.83321	0.355	0.063	1.38561e-22	Endothelial_cell
LOC103386536	1.22466e-26	6.84724	0.355	0.061	2.56162e-22	Endothelial_cell
LOC103378514	2.10058e-26	2.14282	0.487	0.111	4.39378e-22	Endothelial_cell
LOC103386524	2.24524e-26	0.335066	0.697	0.228	4.69637e-22	Endothelial_cell
ophn1	2.32777e-26	0.792639	0.289	0.041	4.869e-22	Endothelial_cell
LOC103385086	2.55845e-26	27.356	0.842	0.387	5.35152e-22	Endothelial_cell
col4a2	4.20957e-26	10.3622	0.263	0.036	8.80516e-22	Endothelial_cell
LOC103392371	5.90149e-26	4.08002	0.395	0.076	1.23441e-21	Endothelial_cell
ptpre	1.22071e-25	0.535814	0.316	0.049	2.55335e-21	Endothelial_cell
LOC103378142	2.12067e-25	6.272	0.329	0.056	4.43581e-21	Endothelial_cell
gmfb	5.75344e-25	3.50016	0.605	0.179	1.20345e-20	Endothelial_cell
LOC103385777	7.99434e-25	8.74077	0.303	0.048	1.67218e-20	Endothelial_cell
LOC103380713	8.22864e-25	2.39743	0.579	0.167	1.72118e-20	Endothelial_cell
inpp5d	9.19267e-25	1.4768	0.276	0.04	1.92283e-20	Endothelial_cell
LOC103378348	1.86857e-24	1.66989	0.461	0.106	3.90848e-20	Endothelial_cell
LOC103382017	2.45509e-24	2.93797	0.263	0.037	5.13531e-20	Endothelial_cell
hck	7.23309e-24	5.31136	0.289	0.046	1.51294e-19	Endothelial_cell
LOC103383794	1.60074e-23	19.4276	0.447	0.108	3.34828e-19	Endothelial_cell
LOC103389822	3.16748e-23	5.15964	0.303	0.052	6.62541e-19	Endothelial_cell
LOC103382107	3.62474e-23	7.46067	0.289	0.047	7.58187e-19	Endothelial_cell
COX1	4.58981e-23	14.5342	0.921	0.556	9.60051e-19	Endothelial_cell
mras	4.66935e-23	1.39792	0.263	0.039	9.76688e-19	Endothelial_cell
LOC103388951	7.80779e-23	2.62121	0.303	0.052	1.63316e-18	Endothelial_cell
LOC103382993	1.03874e-22	15.5384	1	0.679	2.17273e-18	Endothelial_cell
LOC103386121	1.7384e-22	19.5126	0.316	0.057	3.6362e-18	Endothelial_cell
LOC103396090	3.92809e-22	2.2731	0.342	0.067	8.21638e-18	Endothelial_cell
lmo7	1.12814e-21	3.15333	0.303	0.055	2.35973e-17	Endothelial_cell
zyx	1.32276e-21	2.63011	0.368	0.077	2.76681e-17	Endothelial_cell
c16h3orf70	1.35909e-21	0.927341	0.263	0.041	2.84281e-17	Endothelial_cell
LOC103393680	1.52384e-21	5.35177	0.539	0.161	3.18742e-17	Endothelial_cell
LOC103394606	1.86765e-21	26.2938	0.368	0.078	3.90656e-17	Endothelial_cell
LOC103388236	2.9151e-21	29.1096	0.474	0.129	6.09751e-17	Endothelial_cell
LOC103388230	3.35566e-21	43.5292	0.632	0.227	7.01902e-17	Endothelial_cell
LOC103392273	3.43346e-21	2.32094	0.368	0.078	7.18177e-17	Endothelial_cell
LOC103390404	4.40009e-21	5.51867	0.276	0.047	9.20367e-17	Endothelial_cell
LOC103393310	6.31556e-21	8.89852	0.289	0.052	1.32103e-16	Endothelial_cell
LOC103379728	7.5789e-21	23.1675	0.671	0.256	1.58528e-16	Endothelial_cell
ND4	9.26481e-21	1.55833	0.711	0.282	1.93792e-16	Endothelial_cell
was	9.87354e-21	3.34455	0.395	0.092	2.06525e-16	Endothelial_cell
fnbp1	1.79482e-20	1.016	0.447	0.115	3.75422e-16	Endothelial_cell
LOC103394373	2.91311e-20	4.86863	0.5	0.138	6.09335e-16	Endothelial_cell
LOC103384870	5.49345e-20	1.83853	0.592	0.196	1.14907e-15	Endothelial_cell
actn4	7.34538e-20	6.55563	0.553	0.189	1.53643e-15	Endothelial_cell
akap13	1.13368e-19	2.00979	0.263	0.045	2.37131e-15	Endothelial_cell
LOC103388774	1.5234e-19	1.21858	0.368	0.084	3.1865e-15	Endothelial_cell
LOC103393860	3.22978e-19	4.37154	0.789	0.351	6.75572e-15	Endothelial_cell
LOC103383278	1.13355e-18	2.17328	0.474	0.143	2.37105e-14	Endothelial_cell
LOC103391353	1.19725e-18	10.1658	0.289	0.056	2.50429e-14	Endothelial_cell
sars	1.59528e-18	0.839999	0.368	0.087	3.33684e-14	Endothelial_cell
tnfrsf1a	2.65954e-18	1.95665	0.316	0.067	5.56297e-14	Endothelial_cell
LOC103390254	3.75575e-18	20.5356	0.276	0.055	7.8559e-14	Endothelial_cell
ubald1	4.00556e-18	0.993734	0.395	0.099	8.37844e-14	Endothelial_cell
rassf1	5.68404e-18	1.35619	0.342	0.079	1.18893e-13	Endothelial_cell
LOC103385290	5.78011e-18	1.812	0.276	0.052	1.20902e-13	Endothelial_cell
LOC103378690	6.29789e-18	1.11781	0.289	0.057	1.31733e-13	Endothelial_cell
LOC103396751	7.47599e-18	1.15703	0.697	0.326	1.56375e-13	Endothelial_cell
LOC103383560	1.88786e-17	1.5403	0.316	0.068	3.94883e-13	Endothelial_cell
lcp1	2.52585e-17	19.393	0.408	0.114	5.28332e-13	Endothelial_cell
LOC103384725	2.76803e-17	11.0332	0.592	0.241	5.7899e-13	Endothelial_cell
LOC103393840	2.79023e-17	1.83491	0.368	0.094	5.83631e-13	Endothelial_cell
arhgef6	2.86628e-17	0.789695	0.316	0.069	5.9954e-13	Endothelial_cell
LOC103385912	3.54529e-17	3.27763	0.645	0.256	7.41568e-13	Endothelial_cell
itgav	4.4507e-17	2.7748	0.395	0.109	9.30952e-13	Endothelial_cell
ND5	5.98085e-17	0.668993	0.474	0.148	1.25101e-12	Endothelial_cell
LOC103383402	7.39462e-17	4.26944	0.461	0.146	1.54673e-12	Endothelial_cell
LOC103383246	9.04831e-17	1.1555	0.276	0.056	1.89264e-12	Endothelial_cell
LOC103387683	9.25201e-17	0.564413	0.276	0.055	1.93524e-12	Endothelial_cell
gpd2	9.452e-17	0.413816	0.329	0.074	1.97707e-12	Endothelial_cell
klf6	1.12273e-16	3.0389	0.276	0.057	2.34841e-12	Endothelial_cell
elf4	1.29648e-16	4.12032	0.487	0.153	2.71184e-12	Endothelial_cell
LOC103381411	2.23742e-16	3.09639	0.276	0.057	4.68001e-12	Endothelial_cell
LOC103384504	4.16514e-16	1.25011	0.289	0.062	8.71221e-12	Endothelial_cell
LOC103377455	4.22371e-16	10.0698	0.789	0.439	8.83473e-12	Endothelial_cell
psmb8	7.87867e-16	2.75798	0.645	0.246	1.64798e-11	Endothelial_cell
LOC103393837	8.25514e-16	2.05294	0.5	0.17	1.72673e-11	Endothelial_cell
LOC103387948	8.62383e-16	0.863317	0.342	0.083	1.80385e-11	Endothelial_cell
ets1	9.46218e-16	3.31356	0.355	0.092	1.9792e-11	Endothelial_cell
LOC103386293	1.62368e-15	0.873475	0.316	0.075	3.39626e-11	Endothelial_cell
LOC103378360	1.65702e-15	20.3488	0.355	0.095	3.46599e-11	Endothelial_cell
LOC103388697	2.05024e-15	2.33424	0.5	0.171	4.28849e-11	Endothelial_cell
pik3cg	4.05992e-15	1.26902	0.368	0.1	8.49213e-11	Endothelial_cell
LOC103387666	5.544e-15	0.737699	0.382	0.107	1.15964e-10	Endothelial_cell
LOC103382708	5.77008e-15	2.87174	0.289	0.065	1.20693e-10	Endothelial_cell
LOC103388042	7.54496e-15	2.95687	0.618	0.267	1.57818e-10	Endothelial_cell
LOC103397570	1.5261e-14	2.63178	0.263	0.057	3.19215e-10	Endothelial_cell
LOC103380253	2.65597e-14	0.5932	0.368	0.102	5.5555e-10	Endothelial_cell
pim1	4.07667e-14	0.414473	0.461	0.157	8.52718e-10	Endothelial_cell
LOC103393838	7.04939e-14	3.02873	0.382	0.114	1.47452e-09	Endothelial_cell
LOC103389427	7.27833e-14	11.9825	0.342	0.097	1.52241e-09	Endothelial_cell
LOC107990082	7.33739e-14	0.444241	0.263	0.058	1.53476e-09	Endothelial_cell
LOC103390191	1.83344e-13	28.5365	0.368	0.115	3.83501e-09	Endothelial_cell
LOC103389325	2.88625e-13	0.800399	0.368	0.11	6.03717e-09	Endothelial_cell
LOC103388098	2.9927e-13	1.23109	0.421	0.139	6.25983e-09	Endothelial_cell
LOC103386518	3.22248e-13	0.736727	0.263	0.061	6.74047e-09	Endothelial_cell
ND1	7.21869e-13	8.45544	0.605	0.27	1.50993e-08	Endothelial_cell
LOC103390972	8.01233e-13	0.812256	0.329	0.092	1.67594e-08	Endothelial_cell
nfkbie	1.08397e-12	0.612376	0.329	0.093	2.26733e-08	Endothelial_cell
mvp	1.72631e-12	5.48035	0.303	0.082	3.61092e-08	Endothelial_cell
LOC103389260	2.5979e-12	1.19049	0.289	0.076	5.43404e-08	Endothelial_cell
LOC103383009	1.01404e-11	0.777957	0.316	0.093	2.12106e-07	Endothelial_cell
chmp2a	1.72959e-11	2.19846	0.434	0.159	3.61779e-07	Endothelial_cell
capzb	2.09103e-11	1.801	0.5	0.208	4.37382e-07	Endothelial_cell
LOC103384367	2.15844e-11	0.476183	0.276	0.075	4.5148e-07	Endothelial_cell
pfkp	2.4584e-11	1.10981	0.355	0.117	5.14223e-07	Endothelial_cell
eif4a2	3.03452e-11	1.15927	0.382	0.133	6.3473e-07	Endothelial_cell
myo9b	3.348e-11	1.20808	0.276	0.077	7.00301e-07	Endothelial_cell
LOC103378681	3.36094e-11	4.02096	0.447	0.161	7.03009e-07	Endothelial_cell
prcp	3.71008e-11	0.999709	0.276	0.077	7.76037e-07	Endothelial_cell
vwa5a	3.93363e-11	1.40562	0.316	0.095	8.22798e-07	Endothelial_cell
ldlrap1	3.94492e-11	1.10018	0.342	0.107	8.2516e-07	Endothelial_cell
s100a14	5.34176e-11	3.29313	0.579	0.288	1.11734e-06	Endothelial_cell
gse1	6.3564e-11	0.416227	0.355	0.114	1.32957e-06	Endothelial_cell
ktn1	7.9509e-11	1.82307	0.5	0.208	1.66309e-06	Endothelial_cell
LOC103385919	9.79693e-11	20.7797	0.789	0.453	2.04922e-06	Endothelial_cell
tmem269	1.06276e-10	9.76869	0.618	0.33	2.22296e-06	Endothelial_cell
eif4ebp2	1.43259e-10	0.75912	0.342	0.11	2.99656e-06	Endothelial_cell
ptprc	2.38097e-10	2.69042	0.329	0.107	4.98027e-06	Endothelial_cell
add1	3.51697e-10	0.713753	0.289	0.089	7.35644e-06	Endothelial_cell
hnrnpul1	5.12141e-10	0.924119	0.289	0.087	1.07125e-05	Endothelial_cell
calcoco2	6.81204e-10	3.87975	0.316	0.101	1.42487e-05	Endothelial_cell
LOC103394270	7.561e-10	7.40083	0.658	0.391	1.58154e-05	Endothelial_cell
LOC103384693	1.12252e-09	8.50377	0.408	0.166	2.34797e-05	Endothelial_cell
LOC103399827	1.3082e-09	1.53695	0.592	0.327	2.73637e-05	Endothelial_cell
LOC103395943	1.4862e-09	0.314271	0.263	0.076	3.10869e-05	Endothelial_cell
chd2	1.62077e-09	1.54067	0.316	0.102	3.39017e-05	Endothelial_cell
LOC103383101	1.63825e-09	8.30155	0.342	0.13	3.42672e-05	Endothelial_cell
LOC103396334	2.02782e-09	1.54755	0.289	0.095	4.2416e-05	Endothelial_cell
LOC103394414	2.63675e-09	0.424179	0.395	0.15	5.51529e-05	Endothelial_cell
LOC103384343	4.59304e-09	4.35267	0.395	0.156	9.60726e-05	Endothelial_cell
LOC103388351	7.34692e-09	1.23678	0.289	0.098	0.000153676	Endothelial_cell
LOC103393974	8.36651e-09	0.521052	0.289	0.1	0.000175002	Endothelial_cell
LOC103389441	9.71158e-09	1.89898	0.355	0.131	0.000203137	Endothelial_cell
LOC103387093	1.26973e-08	0.740995	0.329	0.121	0.000265589	Endothelial_cell
plscr3	1.44038e-08	1.5535	0.329	0.118	0.000301284	Endothelial_cell
LOC103378260	1.46917e-08	0.360028	0.276	0.088	0.000307306	Endothelial_cell
LOC103388099	1.57332e-08	1.69232	0.263	0.084	0.000329091	Endothelial_cell
limd2	1.93853e-08	2.99197	0.263	0.088	0.000405482	Endothelial_cell
LOC103396108	1.96218e-08	0.510607	0.395	0.157	0.000410428	Endothelial_cell
jak1	2.8431e-08	0.747282	0.316	0.114	0.000594691	Endothelial_cell
2021-03-08	3.01196e-08	0.365571	0.434	0.187	0.000630012	Endothelial_cell
arrb2	3.34538e-08	0.429051	0.447	0.214	0.000699754	Endothelial_cell
arhgdia	3.35437e-08	0.670179	0.355	0.139	0.000701633	Endothelial_cell
LOC103390394	3.48701e-08	0.501314	0.329	0.122	0.000729379	Endothelial_cell
calm2	3.54774e-08	3.51059	0.789	0.602	0.000742081	Endothelial_cell
LOC103381629	3.81342e-08	1.60009	0.263	0.086	0.000797652	Endothelial_cell
rasgrp2	4.34481e-08	3.55095	0.303	0.109	0.000908803	Endothelial_cell
ybx1	4.67838e-08	14.5071	0.908	0.71	0.000978576	Endothelial_cell
LOC103385471	5.96388e-08	1.1328	0.355	0.143	0.00124746	Endothelial_cell
rragc	6.30435e-08	0.532661	0.289	0.104	0.00131868	Endothelial_cell
LOC103385009	6.59933e-08	1.19785	0.329	0.13	0.00138038	Endothelial_cell
arf1	6.73556e-08	0.703485	0.276	0.097	0.00140888	Endothelial_cell
LOC103392545	1.10638e-07	0.320997	0.263	0.088	0.00231422	Endothelial_cell
glyr1	1.85255e-07	0.998235	0.461	0.218	0.00387498	Endothelial_cell
LOC103385527	1.89156e-07	0.392997	0.276	0.099	0.00395657	Endothelial_cell
LOC103386932	2.07516e-07	0.757143	0.289	0.108	0.00434062	Endothelial_cell
tmbim6	2.31047e-07	2.1572	0.539	0.302	0.0048328	Endothelial_cell
zmynd8	2.45258e-07	0.532545	0.263	0.092	0.00513007	Endothelial_cell
hif1a	2.5456e-07	1.85072	0.303	0.118	0.00532463	Endothelial_cell
pdia3	2.63208e-07	3.76634	0.632	0.412	0.00550551	Endothelial_cell
laptm4a	2.76424e-07	1.80637	0.408	0.191	0.00578197	Endothelial_cell
tpm1	2.7701e-07	2.36567	0.382	0.17	0.00579422	Endothelial_cell
LOC103398058	3.66905e-07	0.477963	0.303	0.115	0.00767455	Endothelial_cell
hnrnpr	3.69208e-07	1.02424	0.382	0.177	0.00772273	Endothelial_cell
eif5a	4.42044e-07	1.13602	0.368	0.164	0.00924624	Endothelial_cell
unc93b1	4.52108e-07	1.13526	0.316	0.128	0.00945673	Endothelial_cell
reep5	4.68868e-07	0.598506	0.539	0.318	0.0098073	Endothelial_cell
LOC103384708	4.77539e-07	0.981754	0.579	0.334	0.00998869	Endothelial_cell
LOC103391967	6.49003e-07	1.74067	0.408	0.204	0.0135752	Endothelial_cell
cd46	6.8265e-07	4.26483	0.487	0.267	0.014279	Endothelial_cell
LOC103385928	7.00704e-07	0.320686	0.289	0.108	0.0146566	Endothelial_cell
LOC103393884	7.04627e-07	5.79795	0.408	0.205	0.0147387	Endothelial_cell
LOC103381345	7.07489e-07	4.11318	0.421	0.198	0.0147986	Endothelial_cell
ppt1	8.82442e-07	1.00544	0.368	0.159	0.018458	Endothelial_cell
dync1h1	9.39969e-07	1.61755	0.395	0.189	0.0196613	Endothelial_cell
LOC103386370	9.43938e-07	0.460419	0.303	0.128	0.0197444	Endothelial_cell
psap	1.00422e-06	0.869	0.605	0.444	0.0210053	Endothelial_cell
eif3d	1.17124e-06	1.98511	0.632	0.386	0.0244989	Endothelial_cell
LOC103396682	1.28211e-06	0.304498	0.303	0.123	0.0268179	Endothelial_cell
perp	1.40455e-06	3.87739	0.434	0.237	0.0293789	Endothelial_cell
csde1	1.84091e-06	0.887889	0.408	0.2	0.0385062	Endothelial_cell
LOC103384730	2.02987e-06	0.472367	0.303	0.128	0.0424588	Endothelial_cell
LOC103388342	2.21726e-06	0.867101	0.368	0.173	0.0463785	Endothelial_cell
LOC112486586	2.25724e-06	1.21026	0.263	0.104	0.0472147	Endothelial_cell
tmed10	2.28569e-06	1.78512	0.434	0.225	0.0478097	Endothelial_cell

## Sheet: T cell
Gene	p_val	avg_logFC	pct.1	pct.2	p_val_adj	cluster
LOC103399007	0	225.528	0.911	0.259	0	T cell
LOC103385749	0	142.479	0.766	0.159	0	T cell
LOC103380740	0	22.3898	0.422	0.03	0	T cell
LOC103381726	0	14.6124	0.885	0.048	0	T cell
LOC103398895	0	11.4367	0.906	0.054	0	T cell
LOC103376798	0	9.84602	0.537	0.021	0	T cell
LOC103393314	0	8.68672	0.397	0.02	0	T cell
LOC103392843	0	8.11976	0.469	0.028	0	T cell
runx3	0	7.73676	0.475	0.011	0	T cell
LOC103389838	0	7.68948	0.648	0.021	0	T cell
LOC103393182	0	7.20972	0.759	0.062	0	T cell
LOC103387324	0	7.05927	0.742	0.021	0	T cell
LOC103384365	0	6.51675	0.814	0.045	0	T cell
LOC103392921	0	6.21728	0.652	0.08	0	T cell
LOC103390958	0	5.41553	0.795	0.028	0	T cell
LOC103386863	0	5.3949	0.812	0.102	0	T cell
LOC103389317	0	4.83467	0.597	0.015	0	T cell
il7r	0	4.77042	0.386	0.007	0	T cell
LOC103390777	0	4.68757	0.352	0.008	0	T cell
LOC103395843	0	4.27134	0.482	0.025	0	T cell
ets1	0	3.75196	0.727	0.044	0	T cell
LOC103377691	0	3.51355	0.687	0.034	0	T cell
cd28	0	3.47187	0.384	0.02	0	T cell
LOC103378310	0	3.38355	0.292	0.006	0	T cell
arpc1b	0	3.2875	0.966	0.189	0	T cell
LOC103380484	0	3.10492	0.51	0.047	0	T cell
LOC103392320	0	3.03937	0.367	0.01	0	T cell
LOC103389179	0	2.90043	0.557	0.017	0	T cell
p2ry8	0	2.86637	0.371	0.018	0	T cell
LOC103384278	0	2.70706	0.535	0.017	0	T cell
LOC103379967	0	2.43252	0.305	0.008	0	T cell
LOC103385027	0	2.41766	0.501	0.044	0	T cell
cxcr3	0	2.34489	0.429	0.009	0	T cell
LOC103385960	0	2.24823	0.501	0.041	0	T cell
LOC103395766	0	2.17864	0.586	0.025	0	T cell
LOC103392005	0	2.16473	0.546	0.025	0	T cell
LOC103393936	0	2.10251	0.422	0.01	0	T cell
cd44	0	2.06153	0.473	0.011	0	T cell
cytip	0	1.98089	0.375	0.014	0	T cell
dock2	0	1.94179	0.469	0.025	0	T cell
LOC103390247	0	1.91854	0.565	0.03	0	T cell
LOC103393210	0	1.74009	0.507	0.036	0	T cell
il2rg	0	1.70916	0.448	0.023	0	T cell
LOC103393452	0	1.64972	0.443	0.01	0	T cell
prkacb	0	1.59974	0.407	0.02	0	T cell
LOC103396740	0	1.59661	0.401	0.016	0	T cell
was	0	1.56341	0.61	0.054	0	T cell
acap1	0	1.54913	0.556	0.022	0	T cell
LOC103394667	0	1.43214	0.382	0.011	0	T cell
LOC103385549	0	1.42959	0.463	0.015	0	T cell
LOC103385063	0	1.36214	0.328	0.01	0	T cell
LOC103392607	0	1.35209	0.446	0.018	0	T cell
LOC103395390	0	1.30558	0.363	0.01	0	T cell
LOC103392516	0	1.29746	0.382	0.013	0	T cell
grk6	0	1.27866	0.454	0.026	0	T cell
LOC103388344	0	1.26055	0.386	0.02	0	T cell
def6	0	1.24403	0.429	0.017	0	T cell
LOC103380708	0	1.22096	0.282	0.006	0	T cell
LOC103377690	0	1.15964	0.38	0.005	0	T cell
arhgap15	0	1.14574	0.424	0.026	0	T cell
LOC103395034	0	1.11303	0.593	0.027	0	T cell
LOC103384267	0	1.11027	0.409	0.023	0	T cell
LOC103388951	0	1.10616	0.418	0.026	0	T cell
LOC103384457	0	1.04409	0.401	0.017	0	T cell
LOC103382569	0	1.01303	0.32	0.008	0	T cell
prkd3	0	0.964991	0.315	0.011	0	T cell
LOC103383912	0	0.915295	0.352	0.011	0	T cell
lck	0	0.88774	0.397	0.021	0	T cell
LOC103392950	0	0.863829	0.439	0.029	0	T cell
prkcq	0	0.831707	0.29	0.008	0	T cell
LOC103397570	0	0.543403	0.441	0.029	0	T cell
LOC103392688	0	0.529245	0.759	0.055	0	T cell
LOC103382743	0	0.484474	0.501	0.029	0	T cell
LOC107988596	0	0.357378	0.394	0.013	0	T cell
LOC103392405	3.966e-298	0.977912	0.373	0.021	8.29569e-294	T cell
LOC103382017	1.03593e-295	0.425199	0.339	0.016	2.16686e-291	T cell
LOC103388786	9.58957e-292	1.92519	0.282	0.008	2.00585e-287	T cell
LOC103396090	7.47593e-287	1.4278	0.454	0.04	1.56374e-282	T cell
sh2d1a	1.11232e-281	1.30866	0.298	0.011	2.32664e-277	T cell
LOC103388835	2.18296e-275	0.674586	0.286	0.01	4.56611e-271	T cell
LOC103398779	2.34142e-271	4.57429	0.542	0.068	4.89756e-267	T cell
LOC103387733	6.96436e-268	1.73158	0.431	0.038	1.45674e-263	T cell
map2k1	3.69633e-264	0.911719	0.299	0.014	7.7316e-260	T cell
elf4	5.63137e-262	1.01578	0.667	0.115	1.17791e-257	T cell
vav1	5.68815e-261	1.14794	0.529	0.067	1.18979e-256	T cell
LOC103391624	1.48144e-252	1.00311	0.339	0.022	3.09873e-248	T cell
cst7	3.40383e-251	2.98435	0.288	0.013	7.11979e-247	T cell
LOC103389171	4.60739e-245	0.98558	0.252	0.009	9.63729e-241	T cell
LOC103379863	7.39297e-242	3.25619	0.637	0.111	1.54639e-237	T cell
LOC103384523	3.48573e-237	2.83619	0.322	0.021	7.2911e-233	T cell
LOC103391479	4.63337e-237	7.56099	0.315	0.02	9.69162e-233	T cell
fnbp1	8.72928e-234	1.6459	0.55	0.084	1.8259e-229	T cell
apbb1ip	6.86439e-225	0.601542	0.282	0.016	1.43583e-220	T cell
LOC107989245	4.12612e-223	0.928361	0.267	0.014	8.6306e-219	T cell
LOC103383433	4.52211e-223	0.628129	0.258	0.012	9.4589e-219	T cell
inpp5d	2.19264e-220	1.02149	0.309	0.021	4.58634e-216	T cell
LOC103389360	1.52803e-218	0.871705	0.345	0.029	3.19618e-214	T cell
pik3ap1	1.8171e-216	1.07336	0.264	0.014	3.80084e-212	T cell
LOC103397917	4.01702e-216	0.785707	0.269	0.015	8.40239e-212	T cell
LOC103396971	2.22936e-213	2.99955	0.659	0.137	4.66316e-209	T cell
LOC103391641	1.95128e-212	1.43886	0.39	0.041	4.08149e-208	T cell
LOC103395314	1.20604e-207	0.936783	0.542	0.092	2.52268e-203	T cell
sipa1	5.45902e-207	0.765741	0.29	0.02	1.14186e-202	T cell
LOC103381118	5.37061e-206	2.09524	0.599	0.116	1.12337e-201	T cell
LOC103398788	9.47704e-201	0.897072	0.286	0.02	1.98231e-196	T cell
arhgap45	5.60692e-199	1.69665	0.68	0.167	1.1728e-194	T cell
itk	3.59212e-193	0.955802	0.252	0.015	7.51363e-189	T cell
hic1	1.1305e-190	1.00981	0.266	0.018	2.36466e-186	T cell
LOC103396000	2.6026e-186	3.23042	0.864	0.307	5.44387e-182	T cell
dock8	4.32949e-185	0.927181	0.363	0.042	9.056e-181	T cell
LOC103395311	2.33498e-184	0.963584	0.326	0.032	4.88408e-180	T cell
chst3	4.44955e-183	0.809909	0.282	0.023	9.30712e-179	T cell
LOC103396735	1.2187e-182	2.20618	0.279	0.022	2.54915e-178	T cell
LOC103384564	6.09547e-174	0.718365	0.252	0.018	1.27499e-169	T cell
arhgef1	1.00822e-172	1.71457	0.384	0.052	2.10889e-168	T cell
prex1	7.50315e-169	0.978233	0.331	0.038	1.56943e-164	T cell
LOC103392371	1.26702e-168	0.367004	0.388	0.054	2.65023e-164	T cell
LOC103383489	3.66171e-167	3.21296	0.48	0.089	7.6592e-163	T cell
LOC103385912	4.86735e-164	3.62661	0.712	0.224	1.0181e-159	T cell
pik3cd	4.12517e-163	1.01369	0.294	0.029	8.62861e-159	T cell
LOC103391968	1.46358e-162	1.36609	0.288	0.028	3.06136e-158	T cell
LOC103383368	1.17386e-161	1.12599	0.294	0.03	2.45537e-157	T cell
nfkb1	7.79732e-159	0.769844	0.343	0.044	1.63097e-154	T cell
LOC103385290	5.40723e-158	0.897836	0.307	0.034	1.13103e-153	T cell
sash3	1.01487e-152	1.60324	0.503	0.109	2.12281e-148	T cell
fam78a	4.74193e-150	0.882484	0.399	0.065	9.9187e-146	T cell
sbf1	6.29377e-149	1.38012	0.392	0.063	1.31647e-144	T cell
LOC103393632	1.84805e-147	1.21505	0.399	0.067	3.86556e-143	T cell
LOC103383813	2.30252e-143	0.509193	0.61	0.172	4.81619e-139	T cell
LOC103384570	7.13389e-141	0.629716	0.288	0.034	1.4922e-136	T cell
LOC103396123	9.00428e-139	1.54891	0.375	0.064	1.88343e-134	T cell
LOC103381583	4.76738e-136	0.907001	0.258	0.028	9.97193e-132	T cell
LOC107989032	3.64085e-134	6.04255	0.454	0.101	7.61557e-130	T cell
LOC103396244	6.90926e-132	1.04265	0.32	0.047	1.44521e-127	T cell
LOC103386426	8.6938e-132	2.63605	0.254	0.029	1.81848e-127	T cell
ddx21	1.79711e-128	0.934167	0.921	0.561	3.75901e-124	T cell
tnip1	1.99354e-128	6.91276	0.591	0.188	4.16989e-124	T cell
LOC103380448	3.64117e-121	0.95015	0.313	0.049	7.61624e-117	T cell
LOC103384367	1.87397e-120	1.28695	0.333	0.056	3.91979e-116	T cell
LOC103379069	5.59133e-119	1.56291	0.339	0.06	1.16954e-114	T cell
LOC103386524	1.64413e-116	4.67924	0.625	0.202	3.43902e-112	T cell
ifi35	3.84855e-114	2.28307	0.281	0.041	8.05001e-110	T cell
LOC103393840	2.52827e-113	2.34082	0.373	0.075	5.28838e-109	T cell
LOC103396849	3.3143e-109	1.34315	0.254	0.035	6.93252e-105	T cell
samsn1	2.36903e-108	1.03251	0.264	0.038	4.9553e-104	T cell
LOC103379127	4.88767e-108	35.8334	0.819	0.42	1.02235e-103	T cell
rsl24d1	8.1648e-108	0.922805	0.787	0.379	1.70783e-103	T cell
ikzf1	1.70323e-107	0.304691	0.277	0.042	3.56264e-103	T cell
LOC103392614	6.40105e-107	0.614489	0.258	0.037	1.33891e-102	T cell
LOC103385066	1.73052e-106	0.921849	0.365	0.075	3.61973e-102	T cell
LOC103379525	7.44187e-105	0.514368	0.269	0.041	1.55662e-100	T cell
LOC103397426	2.28315e-104	0.888741	0.254	0.037	4.77567e-100	T cell
dbnl	1.26062e-100	1.31007	0.303	0.055	2.63683e-96	T cell
LOC103381345	2.85136e-99	0.541918	0.546	0.172	5.9642e-95	T cell
LOC103388179	3.29197e-99	13.9884	0.307	0.058	6.88582e-95	T cell
LOC103398280	5.42813e-99	1.07341	0.315	0.06	1.1354e-94	T cell
LOC103377216	2.70172e-96	14.1011	0.296	0.056	5.65119e-92	T cell
triobp	4.57841e-95	0.654898	0.322	0.065	9.57666e-91	T cell
LOC107989126	7.62064e-95	0.469638	0.256	0.041	1.59401e-90	T cell
LOC103380197	1.83547e-92	0.989613	0.269	0.047	3.83926e-88	T cell
calcoco2	7.63441e-92	0.815368	0.36	0.083	1.59689e-87	T cell
ezr	1.92198e-90	1.60162	0.412	0.112	4.0202e-86	T cell
LOC103379009	1.42534e-87	1.97178	0.324	0.731	2.98139e-83	T cell
asmtl	5.41317e-87	0.792919	0.324	0.072	1.13227e-82	T cell
LOC103396751	1.67674e-85	1.31572	0.667	0.303	3.50725e-81	T cell
LOC103394414	2.43535e-85	0.973458	0.446	0.13	5.09401e-81	T cell
zc3h11a	1.12015e-81	0.761414	0.377	0.101	2.34301e-77	T cell
LOC103390444	1.54581e-80	0.904864	0.311	0.07	3.23338e-76	T cell
LOC103395215	6.4233e-79	1.1437	0.281	0.059	1.34356e-74	T cell
mphosph8	2.24666e-78	1.19308	0.439	0.133	4.69934e-74	T cell
jak1	5.30041e-78	0.577195	0.365	0.097	1.10869e-73	T cell
chd2	2.67829e-76	1.41655	0.335	0.086	5.60219e-72	T cell
LOC103394596	3.2933e-76	1.98025	0.277	0.06	6.8886e-72	T cell
slk	2.90745e-73	0.424648	0.388	0.114	6.08151e-69	T cell
kat6b	1.51435e-71	0.551717	0.256	0.054	3.16757e-67	T cell
itpr3	1.51235e-70	0.965138	0.269	0.059	3.16339e-66	T cell
LOC103378620	2.91016e-70	0.471729	0.322	0.083	6.08719e-66	T cell
pik3r1	2.93974e-70	0.862947	0.269	0.06	6.14906e-66	T cell
LOC103386254	1.06701e-69	0.474193	0.26	0.055	2.23186e-65	T cell
luc7l	1.10051e-69	1.02375	0.362	0.103	2.30194e-65	T cell
LOC103394559	1.68068e-68	0.582741	0.269	0.061	3.51548e-64	T cell
pik3cg	3.37843e-67	0.905914	0.318	0.086	7.06667e-63	T cell
arhgef6	4.50902e-67	0.847322	0.258	0.057	9.43153e-63	T cell
LOC103398605	3.78247e-66	0.723437	0.275	0.066	7.91179e-62	T cell
LOC103393837	4.38307e-65	0.636434	0.446	0.152	9.16807e-61	T cell
2021-09-06	8.40067e-65	0.949912	0.384	0.124	1.75717e-60	T cell
LOC103388024	1.38906e-64	3.83252	0.36	0.116	2.9055e-60	T cell
pfkp	4.39074e-64	1.03756	0.343	0.102	9.18412e-60	T cell
LOC103398552	5.22228e-64	0.603314	0.262	0.061	1.09235e-59	T cell
LOC103394864	2.77302e-63	0.496765	0.29	0.075	5.80032e-59	T cell
slco3a1	5.8282e-60	0.66149	0.254	0.061	1.21908e-55	T cell
rbm5	1.09689e-59	0.338108	0.548	0.239	2.29437e-55	T cell
LOC103389260	6.73885e-59	1.12775	0.258	0.064	1.40956e-54	T cell
eml4	1.8247e-58	0.884745	0.267	0.069	3.81672e-54	T cell
arhgdia	3.38544e-58	0.62166	0.371	0.123	7.08133e-54	T cell
rassf1	7.2147e-58	0.477909	0.266	0.067	1.5091e-53	T cell
LOC103378482	1.34741e-57	0.905879	0.264	0.068	2.81838e-53	T cell
LOC103392211	3.05414e-57	7.49997	0.269	0.072	6.38834e-53	T cell
irf1	3.18896e-57	14.3591	0.476	0.188	6.67035e-53	T cell
LOC103379862	6.19578e-54	0.986388	0.298	0.089	1.29597e-49	T cell
nfkbie	1.75235e-50	0.656764	0.275	0.081	3.66539e-46	T cell
LOC103391020	3.51085e-49	0.695253	0.433	0.179	7.34365e-45	T cell
rasal2	2.14687e-46	0.538292	0.275	0.085	4.49061e-42	T cell
cars	2.43446e-44	1.33361	0.339	0.126	5.09215e-40	T cell
LOC103384461	4.88977e-44	0.394826	0.254	0.076	1.02279e-39	T cell
LOC103389325	1.63087e-42	0.289622	0.294	0.098	3.41128e-38	T cell
LOC103378260	1.584e-41	0.265121	0.252	0.078	3.31326e-37	T cell
LOC103387267	9.17697e-41	0.480963	0.348	0.131	1.91955e-36	T cell
LOC103387432	1.32811e-40	0.845278	0.316	0.113	2.77801e-36	T cell
kmt2a	3.2709e-39	0.835344	0.262	0.087	6.84174e-35	T cell
LOC103388342	4.30407e-36	0.502858	0.369	0.159	9.00283e-32	T cell
LOC103383558	5.57524e-36	0.67186	0.341	0.139	1.16617e-31	T cell
LOC103395982	3.25653e-32	0.305105	0.258	0.095	6.81168e-28	T cell
smarca2	5.87603e-31	0.330198	0.286	0.113	1.22909e-26	T cell
rabgap1l	1.05259e-30	0.815229	0.269	0.105	2.2017e-26	T cell
LOC103386454	4.43925e-30	0.923008	0.416	0.214	9.28559e-26	T cell
prpf39	2.20171e-29	0.382646	0.267	0.106	4.60531e-25	T cell
snd1	4.45365e-29	1.56199	0.358	0.172	9.3157e-25	T cell
pnn	7.46694e-28	0.563998	0.356	0.171	1.56186e-23	T cell
prr5l	1.12423e-27	0.293034	0.343	0.161	2.35154e-23	T cell
LOC103386258	6.71137e-27	0.456908	0.315	0.143	1.40382e-22	T cell
LOC103385776	3.53002e-26	1.21777	0.345	0.169	7.38374e-22	T cell
sfpq	1.09162e-25	0.896178	0.414	0.223	2.28335e-21	T cell
LOC103388544	1.7619e-25	2.19912	0.137	0.367	3.68537e-21	T cell
LOC103388305	8.02146e-25	2.14562	0.107	0.319	1.67785e-20	T cell
LOC103386291	9.1886e-25	0.910571	0.363	0.186	1.92198e-20	T cell
LOC103387093	1.92123e-24	0.549223	0.26	0.112	4.01864e-20	T cell
LOC103388697	8.48555e-24	0.50419	0.333	0.162	1.77492e-19	T cell
kmt2b	9.07352e-23	0.363465	0.303	0.145	1.89791e-18	T cell
LOC103388655	1.62561e-22	0.288683	0.384	0.207	3.40029e-18	T cell
LOC103388098	2.09042e-20	1.12127	0.275	0.131	4.37254e-16	T cell
LOC103396770	2.84243e-20	1.39883	0.256	0.118	5.9455e-16	T cell
thoc2	1.20719e-18	0.717469	0.343	0.189	2.52509e-14	T cell
LOC103394687	5.05723e-18	0.412901	0.315	0.167	1.05782e-13	T cell
eif3d	5.06326e-18	1.71025	0.557	0.375	1.05908e-13	T cell
hnrnpr	7.60799e-17	0.258189	0.313	0.168	1.59136e-12	T cell
phf20	2.51036e-16	0.358123	0.269	0.14	5.25091e-12	T cell
gpbp1l1	1.72259e-14	0.464023	0.273	0.149	3.60315e-10	T cell
LOC103397068	1.75161e-14	0.337341	0.273	0.147	3.66384e-10	T cell
ncl	1.85162e-14	5.22561	0.435	0.28	3.87303e-10	T cell
morc3	8.50637e-13	1.37705	0.318	0.194	1.77928e-08	T cell
ndfip2	2.74419e-12	0.842146	0.284	0.168	5.74003e-08	T cell
pim1	1.32739e-11	2.85638	0.262	0.152	2.77649e-07	T cell
srsf11	7.84415e-11	0.598851	0.431	0.295	1.64076e-06	T cell
hspd1	8.30368e-11	0.375658	0.169	0.298	1.73688e-06	T cell
LOC103388088	1.43973e-10	27.5281	0.623	0.474	3.01147e-06	T cell
LOC103378835	4.49248e-10	1.78184	0.311	0.198	9.39692e-06	T cell
LOC103391967	6.2174e-10	0.921665	0.307	0.198	1.30049e-05	T cell
phb2	3.14205e-09	1.44732	0.179	0.296	6.57222e-05	T cell
baz1b	5.48444e-09	1.30973	0.318	0.219	0.000114718	T cell
cct6a	1.1574e-07	0.425566	0.38	0.28	0.00242093	T cell
ktn1	4.19953e-07	1.22356	0.296	0.204	0.00878416	T cell

## Sheet: Macrophage
Gene	p_val	avg_logFC	pct.1	pct.2	p_val_adj	cluster
LOC103379925	0	150.515	1	0.029	0	Macrophage
sytl3	0	45.8858	0.804	0.009	0	Macrophage
LOC103388488	0	41.7044	0.929	0.014	0	Macrophage
tp53i3	0	26.6061	0.839	0.012	0	Macrophage
LOC103389690	0	21.9585	0.946	0.007	0	Macrophage
LOC103390486	0	20.182	0.893	0.006	0	Macrophage
LOC103377371	0	14.9663	0.893	0.007	0	Macrophage
LOC103383343	0	14.5971	0.946	0.006	0	Macrophage
LOC103399816	0	14.2478	0.893	0.012	0	Macrophage
LOC103381588	0	13.7882	0.911	0.009	0	Macrophage
LOC103378755	0	12.0758	0.804	0.008	0	Macrophage
LOC103377071	0	11.9646	0.821	0.008	0	Macrophage
LOC103393131	0	11.0677	0.839	0.01	0	Macrophage
LOC103388005	0	10.1288	0.875	0.009	0	Macrophage
LOC103379541	0	9.84108	0.964	0.024	0	Macrophage
LOC103388570	0	9.40423	0.857	0.004	0	Macrophage
slc43a3	0	9.37403	0.964	0.009	0	Macrophage
LOC103395657	0	9.17755	0.911	0.011	0	Macrophage
LOC103384894	0	9.11869	0.857	0.006	0	Macrophage
LOC103388119	0	8.09338	0.893	0.003	0	Macrophage
LOC103388513	0	7.27348	0.929	0.005	0	Macrophage
LOC103396722	0	7.00805	0.768	0.003	0	Macrophage
ca6	0	6.09755	0.804	0.004	0	Macrophage
LOC103388517	0	6.09095	0.589	0.004	0	Macrophage
LOC103392444	0	6.01606	0.643	0.003	0	Macrophage
LOC103388308	0	5.72615	0.839	0.003	0	Macrophage
LOC103379385	0	5.30805	0.804	0.011	0	Macrophage
LOC103388203	0	4.53942	0.804	0.003	0	Macrophage
LOC103395606	0	4.23277	0.554	0.001	0	Macrophage
LOC103380983	0	4.12361	0.536	0.002	0	Macrophage
LOC103386930	0	3.79012	0.625	0.006	0	Macrophage
LOC103377709	0	3.77777	0.696	0.008	0	Macrophage
LOC103387507	0	3.68124	0.679	0.004	0	Macrophage
LOC103377630	0	3.52528	0.679	0.002	0	Macrophage
LOC103384411	0	3.24329	0.714	0.012	0	Macrophage
csf3r	0	3.2351	0.5	0.005	0	Macrophage
LOC107989866	0	3.22556	0.661	0.011	0	Macrophage
LOC103382043	0	3.18996	0.482	0.002	0	Macrophage
elovl5	0	3.03724	0.518	0.002	0	Macrophage
spi1	0	3.02911	0.929	0.006	0	Macrophage
LOC103381300	0	2.65494	0.589	0.004	0	Macrophage
LOC103391003	0	2.62869	0.696	0.003	0	Macrophage
LOC103388732	0	2.57291	0.518	0.003	0	Macrophage
LOC103390237	0	2.4918	0.446	0.002	0	Macrophage
plin2	0	2.41675	0.696	0.011	0	Macrophage
matk	0	2.41599	0.464	0.004	0	Macrophage
LOC112488357	0	2.35201	0.554	0.005	0	Macrophage
LOC107988765	0	2.27128	0.375	0.002	0	Macrophage
LOC103385335	0	2.23702	0.411	0.001	0	Macrophage
LOC103393030	0	2.13988	0.589	0.004	0	Macrophage
LOC103379180	0	2.07178	0.571	0.004	0	Macrophage
LOC103382963	0	1.99711	0.571	0.003	0	Macrophage
mlkl	0	1.89092	0.536	0.006	0	Macrophage
LOC103391360	0	1.8643	0.393	0.003	0	Macrophage
LOC103381295	0	1.77269	0.607	0.004	0	Macrophage
LOC103397961	0	1.74137	0.571	0.005	0	Macrophage
LOC103382258	0	1.68037	0.518	0.005	0	Macrophage
LOC103388112	0	1.36047	0.5	0.002	0	Macrophage
LOC103397409	0	1.21075	0.411	0.001	0	Macrophage
gpr141	0	0.784799	0.411	0.002	0	Macrophage
LOC103388430	0	0.76116	0.339	0.001	0	Macrophage
LOC103389837	0	0.730954	0.339	0.001	0	Macrophage
LOC103381834	0	0.572531	0.357	0.001	0	Macrophage
LOC107988063	9.49042e-305	4.02926	0.375	0.003	1.98511e-300	Macrophage
ptpn6	4.90413e-296	9.42952	0.964	0.032	1.0258e-291	Macrophage
itpka	4.94858e-291	2.46696	0.554	0.008	1.03509e-286	Macrophage
LOC103379927	2.42092e-287	131.457	1	0.037	5.06383e-283	Macrophage
LOC103389054	1.65301e-285	0.900761	0.339	0.002	3.45761e-281	Macrophage
card9	6.77497e-284	4.39103	0.268	0.001	1.41712e-279	Macrophage
LOC103391240	9.68455e-284	6.77003	0.714	0.016	2.02572e-279	Macrophage
LOC103385607	4.10219e-278	23.7275	0.946	0.033	8.58056e-274	Macrophage
LOC103380524	4.56078e-276	10.4388	0.982	0.037	9.53979e-272	Macrophage
dhx58	2.26322e-265	1.53062	0.571	0.01	4.73398e-261	Macrophage
LOC103398026	2.63721e-260	0.946174	0.411	0.005	5.51625e-256	Macrophage
mxd4	3.0509e-260	11.0093	0.821	0.026	6.38158e-256	Macrophage
LOC103383984	5.71585e-258	2.52187	0.304	0.002	1.19559e-253	Macrophage
abracl	2.71553e-257	5.88302	0.875	0.03	5.68008e-253	Macrophage
LOC103378684	6.06469e-257	2.66105	0.679	0.016	1.26855e-252	Macrophage
pstpip2	4.59726e-255	15.8239	0.911	0.034	9.61608e-251	Macrophage
tor4a	1.04664e-252	7.05003	0.75	0.021	2.18927e-248	Macrophage
pllp	9.72817e-250	1.02995	0.268	0.001	2.03484e-245	Macrophage
nadk	1.48832e-249	11.9294	0.857	0.03	3.11311e-245	Macrophage
LOC103390127	3.98128e-246	3.46211	0.696	0.019	8.32765e-242	Macrophage
LOC103385767	4.85045e-244	2.8352	0.732	0.021	1.01457e-239	Macrophage
LOC103382986	4.99412e-244	11.4551	0.893	0.034	1.04462e-239	Macrophage
LOC103393693	2.25133e-243	0.856039	0.429	0.006	4.7091e-239	Macrophage
LOC103381225	5.07104e-242	0.852888	0.321	0.003	1.06071e-237	Macrophage
LOC103377906	3.66678e-241	3.55876	0.518	0.009	7.6698e-237	Macrophage
arg2	2.4794e-237	7.96238	0.732	0.022	5.18616e-233	Macrophage
fermt3	7.03822e-236	5.25878	0.857	0.031	1.47218e-231	Macrophage
tmem154	6.84574e-231	5.98636	0.893	0.035	1.43192e-226	Macrophage
LOC103386866	4.33177e-227	3.76134	0.536	0.011	9.06076e-223	Macrophage
hsd3b7	1.46536e-223	1.42147	0.464	0.008	3.0651e-219	Macrophage
plek	1.40899e-220	3.2351	0.768	0.026	2.94718e-216	Macrophage
LOC103386813	4.09482e-219	2.95793	0.929	0.042	8.56514e-215	Macrophage
LOC103397404	1.19476e-216	34.0845	0.357	0.004	2.49908e-212	Macrophage
cxcr4	5.9411e-215	5.46374	0.607	0.016	1.2427e-210	Macrophage
LOC103376736	9.01792e-215	2.37799	0.571	0.014	1.88628e-210	Macrophage
LOC103389132	1.52998e-214	0.430788	0.268	0.002	3.20027e-210	Macrophage
ncf1	2.16358e-214	0.986269	0.393	0.006	4.52557e-210	Macrophage
hck	1.97424e-212	3.19828	0.911	0.041	4.12951e-208	Macrophage
acss2	2.26869e-211	7.11334	0.875	0.039	4.74541e-207	Macrophage
LOC103390352	7.88055e-208	1.41197	0.482	0.01	1.64837e-203	Macrophage
LOC103394262	7.48719e-206	4.19868	0.679	0.022	1.56609e-201	Macrophage
LOC103384523	1.3078e-205	3.80128	0.857	0.037	2.73553e-201	Macrophage
pstpip1	2.48768e-203	12.3021	0.911	0.044	5.20347e-199	Macrophage
vsir	8.67908e-203	15.7746	0.964	0.051	1.8154e-198	Macrophage
LOC103383871	1.16114e-199	2.95586	0.589	0.016	2.42875e-195	Macrophage
LOC103391491	1.66656e-196	1.30309	0.357	0.005	3.48594e-192	Macrophage
LOC103390232	7.64625e-196	4.42968	0.393	0.006	1.59937e-191	Macrophage
LOC103379081	1.11606e-195	3.47189	0.679	0.023	2.33446e-191	Macrophage
LOC103393497	4.19818e-195	1.46249	0.446	0.009	8.78134e-191	Macrophage
LOC103398666	6.72567e-195	6.04789	0.839	0.038	1.40681e-190	Macrophage
LOC103384521	1.48548e-192	2.08599	0.482	0.011	3.10718e-188	Macrophage
LOC103386498	7.39569e-187	9.85023	0.857	0.041	1.54696e-182	Macrophage
LOC103384157	3.5092e-185	0.808288	0.411	0.008	7.34019e-181	Macrophage
LOC103398417	2.29401e-183	0.813912	0.339	0.005	4.79838e-179	Macrophage
LOC103385409	1.16987e-179	4.02123	0.732	0.031	2.44702e-175	Macrophage
LOC103377367	3.72027e-178	2.33671	0.411	0.008	7.7817e-174	Macrophage
LOC103394217	1.54335e-177	1.11599	0.554	0.016	3.22824e-173	Macrophage
nod1	8.62014e-175	1.3774	0.482	0.012	1.80307e-170	Macrophage
plxnc1	1.74475e-174	2.91094	0.607	0.02	3.6495e-170	Macrophage
dapk2	1.47474e-172	3.08015	0.589	0.019	3.08472e-168	Macrophage
LOC103394939	2.22109e-169	1.2904	0.393	0.008	4.64586e-165	Macrophage
LOC103396088	3.13178e-169	3.23146	0.571	0.019	6.55075e-165	Macrophage
LOC103388705	7.12907e-169	7.06653	0.786	0.039	1.49119e-164	Macrophage
LOC103394140	2.80117e-167	68.8395	0.982	0.069	5.85921e-163	Macrophage
LOC103381978	2.13014e-164	0.995544	0.571	0.019	4.45562e-160	Macrophage
LOC103397744	2.17832e-162	1.34524	0.411	0.009	4.5564e-158	Macrophage
sla	6.95624e-161	2.31495	0.554	0.018	1.45504e-156	Macrophage
pgp	3.89774e-160	1.43561	0.464	0.012	8.15291e-156	Macrophage
LOC103398849	5.45657e-158	2.31372	0.5	0.015	1.14135e-153	Macrophage
LOC103391920	1.22125e-155	2.0258	0.643	0.027	2.55448e-151	Macrophage
LOC103380006	9.11454e-155	6.68198	0.857	0.053	1.90649e-150	Macrophage
gmip	2.58327e-154	1.71371	0.571	0.021	5.40344e-150	Macrophage
LOC103383552	9.93963e-153	1.86335	0.321	0.006	2.07907e-148	Macrophage
LOC103376894	1.25289e-152	2.19338	0.286	0.004	2.62067e-148	Macrophage
aplp1	1.60564e-150	3.9177	0.589	0.023	3.35851e-146	Macrophage
LOC103378972	9.5366e-145	0.879026	0.339	0.007	1.99477e-140	Macrophage
rgs19	3.24896e-143	1.27955	0.464	0.014	6.79584e-139	Macrophage
LOC103387006	1.78167e-142	3.07571	0.571	0.022	3.72672e-138	Macrophage
LOC103382743	8.71768e-142	6.79506	0.857	0.058	1.82348e-137	Macrophage
LOC103389901	1.03085e-140	4.33438	0.607	0.027	2.15622e-136	Macrophage
LOC103393009	4.03172e-140	2.47056	0.482	0.016	8.43315e-136	Macrophage
LOC103392950	2.55857e-139	4.58638	0.821	0.053	5.35176e-135	Macrophage
plekho2	1.14555e-136	2.64455	0.732	0.042	2.39614e-132	Macrophage
LOC103393895	2.77352e-134	4.89429	0.375	0.01	5.80137e-130	Macrophage
LOC103397733	5.96849e-134	1.28833	0.357	0.009	1.24843e-129	Macrophage
socs3	2.7385e-133	1.55295	0.411	0.012	5.72811e-129	Macrophage
LOC103390819	1.03349e-132	2.88956	0.625	0.03	2.16176e-128	Macrophage
sqor	2.51771e-131	30.7002	0.964	0.087	5.26629e-127	Macrophage
nccrp1	3.48706e-129	18.1981	0.946	0.085	7.29387e-125	Macrophage
ahdc1	1.08903e-127	1.13331	0.321	0.007	2.27793e-123	Macrophage
LOC103394339	2.36094e-127	7.10158	0.75	0.048	4.93837e-123	Macrophage
LOC103396740	4.42394e-127	1.83167	0.696	0.039	9.25356e-123	Macrophage
LOC103387874	2.21725e-126	96.8948	0.982	0.097	4.63782e-122	Macrophage
LOC103384776	4.65969e-125	4.61148	0.714	0.043	9.74667e-121	Macrophage
LOC103384812	1.36965e-122	1.41124	0.321	0.008	2.8649e-118	Macrophage
LOC103399918	4.55417e-122	31.6618	0.929	0.086	9.52596e-118	Macrophage
rcn2	3.35921e-120	4.05291	0.679	0.04	7.02645e-116	Macrophage
il16	8.60855e-120	15.3448	0.893	0.077	1.80065e-115	Macrophage
skap2	2.21779e-119	3.92609	0.75	0.052	4.63895e-115	Macrophage
pygl	1.88916e-118	10.1263	0.911	0.083	3.95155e-114	Macrophage
LOC103382405	1.72233e-117	8.11202	0.821	0.063	3.6026e-113	Macrophage
samsn1	3.91857e-117	4.31216	0.732	0.049	8.19648e-113	Macrophage
anxa3	2.7251e-116	2.52002	0.661	0.04	5.70008e-112	Macrophage
LOC103398497	7.1958e-116	1.41222	0.268	0.005	1.50515e-111	Macrophage
LOC103388951	3.18339e-115	3.57082	0.732	0.05	6.6587e-111	Macrophage
LOC103397877	3.16193e-114	0.901115	0.286	0.006	6.6138e-110	Macrophage
batf	2.15974e-112	1.68666	0.304	0.007	4.51754e-108	Macrophage
LOC103387072	3.32177e-111	3.4382	0.75	0.054	6.94815e-107	Macrophage
LOC103383441	1.93577e-110	18.3026	1	0.115	4.04905e-106	Macrophage
LOC103394920	2.71528e-110	2.25628	0.589	0.032	5.67956e-106	Macrophage
LOC103392688	7.15579e-110	6.84553	0.946	0.101	1.49678e-105	Macrophage
LOC103390729	8.56127e-110	6.01401	0.589	0.033	1.79076e-105	Macrophage
galnt12	1.82004e-109	1.99312	0.464	0.02	3.80697e-105	Macrophage
ier3	2.14126e-108	1.88496	0.357	0.011	4.47888e-104	Macrophage
tmem268	4.74399e-108	3.13057	0.518	0.025	9.923e-104	Macrophage
vav3	2.1941e-106	0.288927	0.625	0.038	4.5894e-102	Macrophage
LOC103391279	2.73413e-106	3.43833	0.554	0.03	5.71899e-102	Macrophage
LOC103389921	1.37278e-105	2.25767	0.5	0.024	2.87144e-101	Macrophage
LOC103379926	2.68351e-105	0.859915	0.339	0.01	5.61311e-101	Macrophage
LOC103377852	2.94762e-105	0.528321	0.286	0.007	6.16553e-101	Macrophage
grk6	1.26286e-104	3.07061	0.714	0.052	2.64152e-100	Macrophage
LOC103395656	1.70019e-104	2.17553	0.589	0.034	3.55629e-100	Macrophage
LOC103390247	7.82691e-104	3.59869	0.786	0.064	1.63715e-99	Macrophage
dock8	9.73265e-104	3.95887	0.768	0.06	2.03578e-99	Macrophage
dusp5	2.21766e-103	2.60218	0.482	0.023	4.63867e-99	Macrophage
LOC103382017	1.92432e-102	3.82763	0.589	0.035	4.02511e-98	Macrophage
LOC103395541	2.42236e-102	2.39459	0.5	0.025	5.06684e-98	Macrophage
LOC103387331	3.77758e-102	14.5823	0.929	0.099	7.90156e-98	Macrophage
ppp1r3c	2.85599e-101	4.635	0.732	0.058	5.97388e-97	Macrophage
LOC103397570	2.26647e-100	4.70443	0.714	0.054	4.74078e-96	Macrophage
LOC103393893	3.68184e-99	6.76932	0.607	0.039	7.70131e-95	Macrophage
LOC103393212	9.20996e-99	0.855097	0.518	0.027	1.92645e-94	Macrophage
LOC103386161	2.01924e-98	0.843186	0.357	0.012	4.22365e-94	Macrophage
LOC103383724	3.42468e-98	7.16847	0.929	0.109	7.1634e-94	Macrophage
efhd2	1.60151e-96	5.70648	0.786	0.072	3.34988e-92	Macrophage
LOC103395660	3.66684e-96	6.84297	0.857	0.09	7.66993e-92	Macrophage
LOC103379397	6.42195e-96	1.60923	0.357	0.013	1.34328e-91	Macrophage
LOC103388520	6.91407e-96	21.0382	0.929	0.114	1.44622e-91	Macrophage
LOC103379611	2.33179e-95	13.676	0.982	0.134	4.8774e-91	Macrophage
LOC103388501	2.22331e-94	1.59894	0.411	0.018	4.6505e-90	Macrophage
LOC103381742	5.07637e-94	13.6649	0.982	0.131	1.06183e-89	Macrophage
apbb1ip	1.05281e-93	1.37942	0.536	0.031	2.20217e-89	Macrophage
LOC103387403	1.53329e-93	1.93077	0.536	0.031	3.20718e-89	Macrophage
LOC103387733	2.53231e-92	2.15894	0.732	0.062	5.29683e-88	Macrophage
mfsd6l	2.89322e-92	1.61467	0.429	0.02	6.05174e-88	Macrophage
LOC103395354	2.0541e-91	1.23019	0.482	0.026	4.29656e-87	Macrophage
crip1	4.79771e-90	13.4304	0.964	0.124	1.00354e-85	Macrophage
LOC103390420	4.95251e-90	1.17306	0.286	0.009	1.03592e-85	Macrophage
sh3kbp1	7.09497e-90	1.75575	0.536	0.033	1.48405e-85	Macrophage
LOC103377726	2.71726e-89	13.3199	0.857	0.096	5.68369e-85	Macrophage
itgb2	2.7639e-89	5.61664	0.964	0.132	5.78124e-85	Macrophage
isyna1	3.23078e-89	5.8325	0.661	0.054	6.75782e-85	Macrophage
LOC103377745	5.04694e-89	7.10927	0.821	0.091	1.05567e-84	Macrophage
tifa	2.28468e-88	4.63344	0.732	0.066	4.77886e-84	Macrophage
LOC103393448	1.41365e-87	1.69799	0.357	0.014	2.95692e-83	Macrophage
LOC103395034	1.30285e-86	6.07066	0.714	0.064	2.72518e-82	Macrophage
c5h15orf48	1.40088e-86	13.3469	0.875	0.106	2.93023e-82	Macrophage
ptprc	2.19567e-86	6.50796	0.893	0.103	4.59268e-82	Macrophage
ncf4	2.8172e-86	6.3374	0.857	0.102	5.89274e-82	Macrophage
ugcg	6.61267e-86	5.74674	0.714	0.067	1.38317e-81	Macrophage
LOC103397467	7.75233e-86	1.09979	0.411	0.02	1.62156e-81	Macrophage
LOC103393210	1.07524e-85	3.39958	0.732	0.066	2.24908e-81	Macrophage
LOC103385521	3.78417e-85	3.16202	0.714	0.065	7.91534e-81	Macrophage
nacc2	4.12119e-85	1.53734	0.482	0.028	8.6203e-81	Macrophage
LOC103377359	1.28562e-84	3.12829	0.696	0.064	2.68913e-80	Macrophage
pgd	1.58866e-84	25.8602	0.946	0.142	3.32299e-80	Macrophage
egln3	2.22516e-84	5.86871	0.5	0.031	4.65437e-80	Macrophage
glipr1	5.51394e-83	1.41712	0.411	0.02	1.15335e-78	Macrophage
dram1	7.86147e-83	0.917983	0.304	0.011	1.64438e-78	Macrophage
ripor2	9.86257e-83	1.77992	0.393	0.019	2.06295e-78	Macrophage
gchfr	1.91345e-82	0.988821	0.304	0.011	4.00237e-78	Macrophage
was	3.01981e-82	3.48007	0.821	0.089	6.31654e-78	Macrophage
LOC103386863	6.04652e-82	1.97986	0.982	0.148	1.26475e-77	Macrophage
arhgap12	7.34941e-82	3.28259	0.75	0.078	1.53728e-77	Macrophage
dock2	7.69831e-82	2.76702	0.643	0.053	1.61026e-77	Macrophage
rel	3.09968e-81	0.707144	0.357	0.016	6.4836e-77	Macrophage
limd1	2.12272e-80	0.661148	0.304	0.011	4.4401e-76	Macrophage
clic1	8.34923e-80	0.93959	0.446	0.025	1.74641e-75	Macrophage
LOC103392607	2.17095e-79	2.1369	0.589	0.045	4.54098e-75	Macrophage
LOC103387382	3.88369e-79	1.08782	0.286	0.01	8.12352e-75	Macrophage
LOC103397123	7.46414e-79	0.997863	0.286	0.01	1.56127e-74	Macrophage
hk1	2.62715e-78	2.40825	0.679	0.064	5.49521e-74	Macrophage
cap1	8.91369e-78	15.4614	0.964	0.161	1.86448e-73	Macrophage
cebpa	1.27141e-77	1.12793	0.357	0.016	2.65941e-73	Macrophage
marveld1	4.29487e-77	0.533253	0.286	0.01	8.98358e-73	Macrophage
jun	6.80573e-77	1.1567	0.571	0.044	1.42355e-72	Macrophage
ccny	8.04379e-77	1.69801	0.339	0.015	1.68252e-72	Macrophage
tet2	1.48379e-76	1.05524	0.411	0.022	3.10364e-72	Macrophage
ankdd1a	1.08072e-75	1.55493	0.464	0.029	2.26055e-71	Macrophage
LOC103383249	1.20923e-75	1.70082	0.571	0.045	2.52935e-71	Macrophage
LOC103377360	1.64242e-75	0.821043	0.339	0.015	3.43546e-71	Macrophage
LOC103388274	2.68029e-75	1.08269	0.321	0.014	5.60636e-71	Macrophage
LOC112487513	1.60932e-74	0.567803	0.339	0.015	3.3662e-70	Macrophage
ugt8	2.49553e-74	4.97925	0.625	0.056	5.21989e-70	Macrophage
LOC103380372	1.42843e-73	0.510847	0.268	0.009	2.98785e-69	Macrophage
LOC103383562	3.14586e-73	9.93477	0.679	0.07	6.5802e-69	Macrophage
cst7	1.6361e-72	0.856838	0.464	0.03	3.42223e-68	Macrophage
shc1	2.01129e-71	33.1805	0.964	0.184	4.20702e-67	Macrophage
ivns1abp	3.48061e-71	3.56989	0.804	0.1	7.28039e-67	Macrophage
cs	1.72184e-70	3.54074	0.804	0.106	3.60157e-66	Macrophage
LOC103386593	2.32322e-70	3.15192	0.482	0.034	4.85948e-66	Macrophage
cotl1	3.59712e-70	15.5557	0.982	0.198	7.52409e-66	Macrophage
LOC103377019	1.12552e-69	0.50926	0.321	0.015	2.35425e-65	Macrophage
nckap1l	1.03502e-68	0.948066	0.268	0.01	2.16495e-64	Macrophage
LOC103384459	2.07738e-68	0.513731	0.268	0.01	4.34525e-64	Macrophage
rhpn1	2.61538e-68	0.728872	0.286	0.012	5.47059e-64	Macrophage
LOC103397917	6.77071e-68	1.41276	0.446	0.03	1.41623e-63	Macrophage
LOC103377397	1.44072e-67	2.42285	0.5	0.039	3.01356e-63	Macrophage
lpcat2	3.5646e-67	4.0032	0.714	0.084	7.45607e-63	Macrophage
LOC103382506	1.61064e-66	11.6525	0.821	0.125	3.36897e-62	Macrophage
prrg2	4.36129e-66	1.13631	0.732	0.088	9.1225e-62	Macrophage
LOC103383481	4.49877e-66	0.744808	0.339	0.017	9.41009e-62	Macrophage
LOC103382846	4.95061e-66	0.91134	0.268	0.011	1.03552e-61	Macrophage
hif1a	6.47377e-66	3.46901	0.821	0.115	1.35412e-61	Macrophage
gpd2	7.59619e-66	2.32482	0.661	0.072	1.5889e-61	Macrophage
LOC103396629	6.59114e-65	3.44377	0.821	0.122	1.37867e-60	Macrophage
LOC103392371	8.95495e-65	3.6105	0.661	0.074	1.87311e-60	Macrophage
gadd45a	1.31249e-64	9.45647	0.571	0.053	2.74534e-60	Macrophage
LOC103395429	1.69292e-64	1.57718	0.536	0.047	3.54109e-60	Macrophage
rflnb	2.38647e-64	3.85743	0.75	0.098	4.99178e-60	Macrophage
mkl1	4.82974e-64	3.22111	0.607	0.062	1.01024e-59	Macrophage
tbk1	1.50613e-63	1.72326	0.571	0.053	3.15037e-59	Macrophage
lypla2	1.67937e-63	1.27909	0.446	0.033	3.51273e-59	Macrophage
parvg	2.03301e-63	0.488648	0.304	0.014	4.25245e-59	Macrophage
LOC103381411	2.70831e-63	4.05623	0.571	0.055	5.66497e-59	Macrophage
tnfrsf1a	3.65768e-63	4.6338	0.625	0.065	7.65077e-59	Macrophage
glipr2	4.13186e-63	0.73643	0.321	0.016	8.64261e-59	Macrophage
LOC103390982	1.07917e-62	2.13347	0.536	0.047	2.25729e-58	Macrophage
unc13d	1.19692e-62	1.61842	0.321	0.017	2.5036e-58	Macrophage
sh3bgrl	1.31497e-62	5.87089	0.768	0.108	2.75051e-58	Macrophage
LOC103384457	1.4994e-62	1.59266	0.5	0.042	3.1363e-58	Macrophage
LOC103380384	1.8723e-62	12.8466	1	0.253	3.91628e-58	Macrophage
LOC103391968	1.98452e-62	1.51038	0.518	0.044	4.15102e-58	Macrophage
LOC103389393	1.3143e-61	0.524031	0.286	0.013	2.74913e-57	Macrophage
msrb1	2.38033e-61	1.09673	0.589	0.058	4.97894e-57	Macrophage
LOC103387686	3.56045e-61	1.70646	0.643	0.072	7.4474e-57	Macrophage
LOC103386404	4.97024e-61	2.07853	0.589	0.06	1.03962e-56	Macrophage
arpc3	5.00621e-61	9.89282	0.911	0.184	1.04715e-56	Macrophage
LOC103389441	6.20563e-61	4.39604	0.821	0.128	1.29803e-56	Macrophage
arhgdia	2.57216e-60	5.64563	0.821	0.136	5.38018e-56	Macrophage
degs1	3.53663e-60	0.724584	0.339	0.019	7.39757e-56	Macrophage
acap1	3.86059e-60	2.16083	0.571	0.057	8.07519e-56	Macrophage
LOC103382081	6.95798e-60	1.11105	0.429	0.032	1.4554e-55	Macrophage
LOC103395301	4.32203e-59	12.4359	0.964	0.23	9.0404e-55	Macrophage
LOC103398050	9.16949e-59	0.785101	0.304	0.016	1.91798e-54	Macrophage
LOC103386370	1.45222e-58	5.87962	0.804	0.125	3.0376e-54	Macrophage
LOC103379796	1.56199e-58	1.75258	0.554	0.055	3.26721e-54	Macrophage
LOC103388238	1.87372e-58	13.5832	0.661	0.082	3.91926e-54	Macrophage
arpc5	5.09293e-58	8.47658	0.786	0.127	1.06529e-53	Macrophage
LOC103383433	6.41525e-58	1.44665	0.393	0.027	1.34188e-53	Macrophage
LOC103383560	1.40719e-57	1.87712	0.607	0.066	2.94342e-53	Macrophage
ch25h	4.10588e-57	2.17875	0.268	0.013	8.58827e-53	Macrophage
inpp5d	1.0124e-56	1.43291	0.464	0.039	2.11763e-52	Macrophage
LOC103387241	3.19848e-56	10.8746	0.946	0.222	6.69027e-52	Macrophage
zc3h12a	9.48229e-56	0.836205	0.357	0.023	1.98341e-51	Macrophage
tpi1	3.5317e-55	15.3652	0.946	0.246	7.38727e-51	Macrophage
LOC103384878	5.81597e-55	1.61886	0.518	0.05	1.21653e-50	Macrophage
arpc1b	1.00603e-54	3.75979	0.982	0.24	2.10431e-50	Macrophage
kiaa0040	2.67054e-54	0.824661	0.286	0.015	5.58598e-50	Macrophage
cyhr1	3.44569e-54	0.890084	0.375	0.027	7.20736e-50	Macrophage
LOC103384870	4.36681e-54	7.10958	0.893	0.194	9.13405e-50	Macrophage
aldoc	8.09534e-54	13.6773	0.946	0.25	1.6933e-49	Macrophage
upp1	9.67734e-54	19.1489	0.964	0.252	2.02421e-49	Macrophage
zyx	1.24863e-53	5.34367	0.625	0.076	2.61175e-49	Macrophage
LOC103378982	1.3185e-53	23.1384	0.982	0.273	2.7579e-49	Macrophage
LOC103398834	2.0145e-53	1.56548	0.286	0.015	4.21373e-49	Macrophage
LOC103393523	2.20864e-53	0.747552	0.357	0.024	4.61982e-49	Macrophage
LOC103398577	3.36326e-53	0.507345	0.286	0.015	7.03494e-49	Macrophage
slk	3.80982e-53	4.00715	0.786	0.129	7.96901e-49	Macrophage
LOC103388129	4.6536e-53	0.459781	0.286	0.015	9.73394e-49	Macrophage
LOC103395766	6.97219e-53	1.46257	0.571	0.062	1.45837e-48	Macrophage
ikbkb	8.15864e-53	0.915879	0.464	0.042	1.70654e-48	Macrophage
mpc2	8.58646e-53	1.53193	0.393	0.03	1.79603e-48	Macrophage
LOC103387792	1.52365e-52	4.12431	0.607	0.076	3.18701e-48	Macrophage
ikzf1	2.16394e-52	1.17213	0.536	0.056	4.52631e-48	Macrophage
LOC103386781	2.39833e-52	4.81146	0.804	0.153	5.01658e-48	Macrophage
LOC103381629	3.48138e-52	2.82439	0.643	0.083	7.282e-48	Macrophage
mcu	1.05398e-51	0.882656	0.482	0.046	2.2046e-47	Macrophage
dbnl	1.11072e-51	2.24911	0.589	0.069	2.32328e-47	Macrophage
iqgap1	1.20546e-51	5.6519	0.875	0.177	2.52145e-47	Macrophage
noct	1.27351e-51	1.00857	0.339	0.023	2.66381e-47	Macrophage
sptlc2	2.0566e-51	1.84173	0.536	0.058	4.3018e-47	Macrophage
LOC103397803	4.4017e-51	0.831663	0.643	0.086	9.20703e-47	Macrophage
LOC103387770	6.1363e-51	0.873076	0.375	0.028	1.28353e-46	Macrophage
vav1	1.1876e-50	2.94811	0.679	0.097	2.48411e-46	Macrophage
pik3cg	1.30545e-50	2.08037	0.679	0.098	2.73061e-46	Macrophage
celf2	2.56807e-50	2.87626	0.75	0.125	5.37163e-46	Macrophage
LOC103386691	2.70371e-50	16.5031	0.929	0.236	5.65535e-46	Macrophage
LOC103384100	4.03689e-50	1.37638	0.518	0.056	8.44397e-46	Macrophage
LOC103386524	4.31937e-50	2.43368	0.929	0.228	9.03484e-46	Macrophage
rnasek	5.05282e-50	16.93	0.911	0.213	1.0569e-45	Macrophage
LOC103387007	5.21279e-50	1.19408	0.339	0.024	1.09036e-45	Macrophage
actn4	6.59089e-50	1.8931	0.875	0.188	1.37862e-45	Macrophage
LOC103393032	9.21221e-50	1.52279	0.446	0.041	1.92692e-45	Macrophage
LOC103392617	3.20562e-49	1.67273	0.536	0.061	6.70519e-45	Macrophage
wdr1	4.72582e-49	12.211	0.857	0.196	9.88499e-45	Macrophage
pfkp	7.77706e-49	2.77398	0.714	0.115	1.62673e-44	Macrophage
wls	4.02963e-48	4.24838	0.786	0.15	8.42878e-44	Macrophage
LOC103383793	4.52714e-48	3.98716	0.75	0.129	9.46941e-44	Macrophage
LOC103389936	5.0324e-48	64.8466	1	0.387	1.05263e-43	Macrophage
dok1	6.04334e-48	0.501109	0.286	0.017	1.26409e-43	Macrophage
arhgap45	6.96649e-48	4.45046	0.893	0.2	1.45718e-43	Macrophage
cd63	7.6339e-48	9.70503	0.911	0.216	1.59678e-43	Macrophage
cpox	3.77126e-47	3.09704	0.75	0.128	7.88834e-43	Macrophage
capza2	4.80935e-47	11.117	0.929	0.246	1.00597e-42	Macrophage
LOC103396849	9.69561e-47	1.60334	0.464	0.048	2.02803e-42	Macrophage
rassf1	7.69771e-46	1.22837	0.589	0.078	1.61013e-41	Macrophage
ccdc93	9.1797e-46	1.46668	0.464	0.047	1.92012e-41	Macrophage
LOC103398816	1.29887e-45	1.41669	0.571	0.072	2.71684e-41	Macrophage
LOC103378659	1.4813e-45	0.587467	0.304	0.021	3.09844e-41	Macrophage
LOC103379440	1.62346e-45	0.939563	0.429	0.041	3.39578e-41	Macrophage
irf7	1.84441e-45	0.696464	0.393	0.034	3.85795e-41	Macrophage
LOC103384989	2.07639e-45	8.53251	0.714	0.12	4.34318e-41	Macrophage
limd2	2.24561e-45	3.02404	0.607	0.086	4.69715e-41	Macrophage
p2ry8	2.26136e-45	0.302194	0.429	0.041	4.73009e-41	Macrophage
LOC112488045	2.26664e-45	56.8442	0.964	0.332	4.74113e-41	Macrophage
eno1	2.27316e-45	16.5325	0.964	0.331	4.75478e-41	Macrophage
LOC103376755	2.59667e-45	6.3246	0.839	0.192	5.43146e-41	Macrophage
tbc1d10b	2.97174e-45	1.63607	0.482	0.052	6.21599e-41	Macrophage
gmfb	9.75627e-45	5.174	0.821	0.178	2.04072e-40	Macrophage
LOC103377180	1.17162e-44	0.64624	0.411	0.038	2.45068e-40	Macrophage
LOC103394550	1.54014e-44	0.610144	0.393	0.035	3.22151e-40	Macrophage
tnip2	2.46497e-44	1.80986	0.357	0.03	5.15598e-40	Macrophage
pik3cd	2.65276e-44	1.18596	0.446	0.046	5.54878e-40	Macrophage
pgk1	3.0979e-44	8.38908	0.911	0.26	6.47988e-40	Macrophage
LOC103384379	3.74388e-44	0.544009	0.321	0.024	7.83107e-40	Macrophage
LOC103393468	7.17367e-44	4.25431	0.768	0.151	1.50052e-39	Macrophage
LOC103398096	8.01407e-44	0.917724	0.393	0.036	1.6763e-39	Macrophage
micu1	8.27213e-44	3.78435	0.821	0.174	1.73028e-39	Macrophage
kiaa0232	1.37932e-43	3.92041	0.5	0.058	2.88513e-39	Macrophage
arpc2	2.39109e-43	13.1445	0.911	0.284	5.00144e-39	Macrophage
pof1b	4.33439e-43	1.17596	0.339	0.027	9.06624e-39	Macrophage
nuak2	5.6407e-43	2.22828	0.536	0.068	1.17987e-38	Macrophage
klf6	8.45092e-43	1.17799	0.482	0.056	1.76768e-38	Macrophage
LOC103391284	9.51013e-43	1.19512	0.571	0.078	1.98923e-38	Macrophage
cfl1	2.33389e-42	9.83986	1	0.513	4.88179e-38	Macrophage
atp6v1a	2.98142e-42	6.72065	0.679	0.122	6.23624e-38	Macrophage
LOC103392260	3.6142e-42	0.788667	0.321	0.025	7.55982e-38	Macrophage
LOC103383199	6.01304e-42	0.99774	0.375	0.034	1.25775e-37	Macrophage
LOC103388042	6.3082e-42	5.6389	0.929	0.265	1.31949e-37	Macrophage
LOC103385013	8.03874e-42	1.11933	0.375	0.035	1.68146e-37	Macrophage
akap13	1.28917e-41	1.35791	0.429	0.044	2.69655e-37	Macrophage
LOC103396140	1.34129e-41	0.534413	0.321	0.025	2.80557e-37	Macrophage
LOC103376678	1.35903e-41	1.22891	0.393	0.038	2.84269e-37	Macrophage
LOC103390136	1.65577e-41	2.08696	0.464	0.052	3.46336e-37	Macrophage
LOC103393235	1.89461e-41	0.807969	0.321	0.026	3.96295e-37	Macrophage
ptpre	3.52725e-41	1.0462	0.446	0.049	7.37794e-37	Macrophage
twf1	5.62298e-41	3.20326	0.607	0.095	1.17616e-36	Macrophage
eif4ebp2	6.28653e-41	2.06936	0.661	0.108	1.31495e-36	Macrophage
LOC103382179	9.47072e-41	2.07487	0.393	0.039	1.98099e-36	Macrophage
LOC103396735	1.16842e-40	1.49953	0.393	0.038	2.44398e-36	Macrophage
LOC103384300	1.38593e-40	1.47585	0.571	0.081	2.89895e-36	Macrophage
arhgef6	1.60656e-40	1.65268	0.518	0.069	3.36043e-36	Macrophage
LOC103383494	3.36086e-40	3.82842	1	0.557	7.02992e-36	Macrophage
LOC103391697	1.13731e-39	12.4606	0.982	0.425	2.37891e-35	Macrophage
LOC103379990	1.58973e-39	3.6971	0.571	0.086	3.32523e-35	Macrophage
LOC103390421	1.65954e-39	0.996806	0.321	0.027	3.47126e-35	Macrophage
pim1	1.92691e-39	2.98164	0.732	0.155	4.03051e-35	Macrophage
asap2	2.63721e-39	0.59692	0.357	0.033	5.51626e-35	Macrophage
LOC103385895	3.96928e-39	0.900307	0.411	0.044	8.30254e-35	Macrophage
LOC103395314	7.93101e-39	2.12018	0.679	0.121	1.65893e-34	Macrophage
tcirg1	1.13251e-38	4.80727	0.786	0.187	2.36887e-34	Macrophage
LOC103389381	1.13552e-38	2.834	0.732	0.145	2.37516e-34	Macrophage
arhgap15	1.50015e-38	2.07737	0.446	0.052	3.13786e-34	Macrophage
LOC103390791	1.99422e-38	1.21971	0.339	0.031	4.1713e-34	Macrophage
atp6v1h	2.57765e-38	2.40004	0.625	0.107	5.39167e-34	Macrophage
pacsin2	2.8469e-38	1.59857	0.464	0.057	5.95485e-34	Macrophage
LOC103388294	7.72597e-38	95.9206	1	0.738	1.61604e-33	Macrophage
LOC103381583	9.08712e-38	1.35816	0.393	0.042	1.90075e-33	Macrophage
LOC103378142	2.89542e-37	1.73904	0.446	0.056	6.05635e-33	Macrophage
arap1	3.56019e-37	3.58751	0.661	0.131	7.44686e-33	Macrophage
LOC103390810	3.87904e-37	6.18547	0.804	0.2	8.11378e-33	Macrophage
LOC112487575	5.23572e-37	17.8977	0.982	0.534	1.09516e-32	Macrophage
actb	5.96225e-37	42.1595	1	0.926	1.24712e-32	Macrophage
abi1	6.21052e-37	2.77378	0.643	0.117	1.29905e-32	Macrophage
LOC107988900	6.7141e-37	1.54612	0.571	0.092	1.40439e-32	Macrophage
lrp6	9.70255e-37	7.37015	0.714	0.152	2.02948e-32	Macrophage
LOC103379968	1.15381e-36	0.767359	0.357	0.036	2.41343e-32	Macrophage
gnb1	1.24291e-36	15.6182	0.982	0.556	2.5998e-32	Macrophage
rnf181	1.35277e-36	2.28077	0.5	0.07	2.82958e-32	Macrophage
LOC103389260	1.76103e-36	0.914224	0.518	0.075	3.68355e-32	Macrophage
sord	2.05881e-36	2.27573	0.464	0.061	4.3064e-32	Macrophage
snx3	3.63451e-36	1.48746	0.607	0.103	7.60231e-32	Macrophage
clcn7	8.62979e-36	1.33323	0.464	0.062	1.80509e-31	Macrophage
irak4	1.59173e-35	1.15656	0.304	0.027	3.32942e-31	Macrophage
rab27a	2.08344e-35	2.36653	0.661	0.126	4.35793e-31	Macrophage
LOC103394543	2.58166e-35	3.5296	0.464	0.063	5.40006e-31	Macrophage
LOC103386254	3.52949e-35	2.19285	0.482	0.067	7.38263e-31	Macrophage
fam126a	4.13713e-35	0.828355	0.339	0.033	8.65364e-31	Macrophage
cbfb	4.31056e-35	0.724177	0.339	0.033	9.0164e-31	Macrophage
LOC103394596	8.34014e-35	1.2455	0.5	0.072	1.74451e-30	Macrophage
LOC103397425	1.8279e-34	1.07259	0.357	0.038	3.82342e-30	Macrophage
daglb	1.96148e-34	2.07655	0.607	0.109	4.10283e-30	Macrophage
cd46	1.96819e-34	3.26357	0.911	0.264	4.11687e-30	Macrophage
LOC103395311	2.05864e-34	2.44786	0.411	0.051	4.30605e-30	Macrophage
LOC103376740	3.51154e-34	0.973104	0.304	0.028	7.34509e-30	Macrophage
LOC103398575	3.63753e-34	0.598422	0.268	0.022	7.60862e-30	Macrophage
stx7	3.85471e-34	1.02546	0.375	0.042	8.0629e-30	Macrophage
vdac1	4.03535e-34	7.697	0.929	0.343	8.44075e-30	Macrophage
LOC103380735	7.21293e-34	1.82644	0.571	0.1	1.50873e-29	Macrophage
madd	7.65975e-34	2.14002	0.464	0.064	1.60219e-29	Macrophage
LOC103386159	1.05469e-33	6.26608	0.857	0.261	2.20609e-29	Macrophage
LOC103395690	1.9717e-33	0.735624	0.375	0.042	4.12421e-29	Macrophage
uba1	3.11892e-33	5.84193	0.821	0.255	6.52385e-29	Macrophage
mtpn	3.83707e-33	2.78412	0.661	0.141	8.02601e-29	Macrophage
LOC103395711	5.69353e-33	1.43081	0.375	0.043	1.19092e-28	Macrophage
txnip	7.74894e-33	8.71144	0.821	0.24	1.62084e-28	Macrophage
tpd52l1	9.25441e-33	1.29886	0.411	0.053	1.93574e-28	Macrophage
LOC103392738	1.19581e-32	1.08589	0.375	0.044	2.50127e-28	Macrophage
LOC103387948	1.95021e-32	2.46062	0.518	0.083	4.07925e-28	Macrophage
LOC103388697	3.20635e-32	3.98144	0.696	0.171	6.70673e-28	Macrophage
LOC103396751	3.59333e-32	5.79731	0.911	0.325	7.51618e-28	Macrophage
narf	4.2576e-32	3.86335	0.411	0.053	8.90563e-28	Macrophage
LOC103392303	6.65786e-32	1.18312	0.536	0.089	1.39262e-27	Macrophage
LOC103378514	7.26338e-32	3.34521	0.589	0.111	1.51928e-27	Macrophage
tpd52	9.21871e-32	1.45851	0.518	0.084	1.92828e-27	Macrophage
arrb2	1.65374e-31	4.98412	0.768	0.212	3.45914e-27	Macrophage
LOC103396638	2.19984e-31	1.14891	0.321	0.034	4.60141e-27	Macrophage
papss1	2.31918e-31	0.642866	0.357	0.041	4.85102e-27	Macrophage
triobp	2.77926e-31	2.97265	0.5	0.081	5.81338e-27	Macrophage
LOC103393176	3.05854e-31	4.15393	0.911	0.303	6.39755e-27	Macrophage
diaph1	3.44819e-31	1.18802	0.446	0.064	7.21259e-27	Macrophage
fam78a	3.71732e-31	1.1997	0.518	0.087	7.77552e-27	Macrophage
arhgef1	4.23754e-31	1.30438	0.482	0.073	8.86366e-27	Macrophage
taldo1	5.36345e-31	11.8626	0.911	0.42	1.12187e-26	Macrophage
LOC103384585	6.41499e-31	0.863204	0.5	0.079	1.34182e-26	Macrophage
LOC103385834	1.52815e-30	7.39358	0.893	0.338	3.19643e-26	Macrophage
pgls	1.82285e-30	0.882771	0.446	0.064	3.81285e-26	Macrophage
LOC103382158	1.9395e-30	1.10568	0.411	0.056	4.05685e-26	Macrophage
ifi35	2.09637e-30	1.28552	0.411	0.056	4.38497e-26	Macrophage
capzb	3.0447e-30	3.42728	0.75	0.207	6.3686e-26	Macrophage
LOC103393222	3.48572e-30	9.95318	0.964	0.473	7.29109e-26	Macrophage
LOC103385173	4.15143e-30	2.19049	0.625	0.128	8.68355e-26	Macrophage
atp11b	4.46649e-30	0.573456	0.304	0.031	9.34255e-26	Macrophage
arf6	5.39484e-30	1.94817	0.625	0.134	1.12844e-25	Macrophage
dopey2	7.88231e-30	1.34309	0.357	0.043	1.64874e-25	Macrophage
LOC103383639	9.13982e-30	10.2894	0.643	0.143	1.91178e-25	Macrophage
LOC103399827	9.61603e-30	7.84094	0.875	0.326	2.01139e-25	Macrophage
LOC103396090	1.09268e-29	5.44793	0.446	0.067	2.28555e-25	Macrophage
atp6v0d1	1.71509e-29	1.8183	0.607	0.124	3.58746e-25	Macrophage
LOC103390239	1.84574e-29	1.0024	0.339	0.039	3.86073e-25	Macrophage
LOC103388561	2.1195e-29	1.93463	0.554	0.105	4.43335e-25	Macrophage
ero1a	2.89186e-29	2.39106	0.5	0.087	6.0489e-25	Macrophage
LOC103383813	3.0696e-29	6.68922	0.732	0.2	6.42068e-25	Macrophage
sucla2	3.53481e-29	0.850458	0.518	0.09	7.39377e-25	Macrophage
LOC103385290	7.45337e-29	0.62429	0.393	0.052	1.55902e-24	Macrophage
ccni	8.49205e-29	0.879053	0.679	0.156	1.77628e-24	Macrophage
tmed8	1.08844e-28	0.666598	0.321	0.036	2.27668e-24	Macrophage
grb2	1.60371e-28	2.07616	0.518	0.091	3.35449e-24	Macrophage
bri3	1.98443e-28	1.52405	0.304	0.033	4.15083e-24	Macrophage
pip4k2a	2.51719e-28	0.791845	0.375	0.05	5.2652e-24	Macrophage
LOC103391726	3.34713e-28	1.06015	0.339	0.041	7.00119e-24	Macrophage
LOC103391682	3.56645e-28	8.03199	0.571	0.116	7.45993e-24	Macrophage
nr3c1	3.91538e-28	2.0326	0.5	0.088	8.18981e-24	Macrophage
dazap2	4.58191e-28	1.04098	0.732	0.188	9.58397e-24	Macrophage
slc9b2	5.53391e-28	0.994517	0.411	0.059	1.15753e-23	Macrophage
dpyd	5.55019e-28	1.16649	0.375	0.051	1.16093e-23	Macrophage
ktn1	6.00655e-28	2.88024	0.75	0.207	1.25639e-23	Macrophage
ankfy1	7.4152e-28	0.670121	0.339	0.041	1.55104e-23	Macrophage
LOC103392005	9.01109e-28	1.19239	0.411	0.061	1.88485e-23	Macrophage
nfkb2	1.17862e-27	0.700823	0.321	0.037	2.46532e-23	Macrophage
LOC103389253	1.34382e-27	3.40072	0.696	0.181	2.81086e-23	Macrophage
LOC103380531	1.62004e-27	1.20406	0.411	0.06	3.38864e-23	Macrophage
LOC103385643	1.8705e-27	5.47734	0.857	0.318	3.91252e-23	Macrophage
reep5	1.89672e-27	3.75131	0.857	0.317	3.96737e-23	Macrophage
LOC103385776	2.17705e-27	1.79893	0.679	0.178	4.55374e-23	Macrophage
LOC103391747	3.11186e-27	1.19526	0.375	0.051	6.50908e-23	Macrophage
gsr	3.13045e-27	6.52826	0.643	0.161	6.54797e-23	Macrophage
diaph2	3.16406e-27	0.280409	0.286	0.03	6.61827e-23	Macrophage
LOC103380095	3.44007e-27	1.14817	0.268	0.027	7.19558e-23	Macrophage
atp6v1g1	3.84441e-27	4.77982	0.857	0.309	8.04136e-23	Macrophage
nfkbie	4.3815e-27	2.43389	0.5	0.092	9.16479e-23	Macrophage
tmem131l	5.3873e-27	1.6143	0.571	0.116	1.12686e-22	Macrophage
agtrap	6.09628e-27	0.453917	0.304	0.034	1.27516e-22	Macrophage
LOC103379657	6.38786e-27	1.57236	0.429	0.066	1.33615e-22	Macrophage
fgd4	1.16986e-26	0.869648	0.393	0.056	2.447e-22	Macrophage
wsb1	1.22635e-26	1.39074	0.571	0.114	2.56515e-22	Macrophage
LOC103396962	1.34146e-26	0.991166	0.464	0.08	2.80593e-22	Macrophage
LOC103393680	1.36661e-26	2.57865	0.661	0.161	2.85853e-22	Macrophage
LOC103395658	1.71642e-26	0.571656	0.286	0.031	3.59024e-22	Macrophage
LOC103384078	1.79305e-26	1.139	0.375	0.053	3.75052e-22	Macrophage
LOC103390165	1.87034e-26	7.03316	0.857	0.371	3.91218e-22	Macrophage
LOC103379030	3.53137e-26	2.09096	0.625	0.147	7.38657e-22	Macrophage
snx24	3.53528e-26	0.870617	0.464	0.079	7.39475e-22	Macrophage
igflr1	3.88269e-26	2.61096	0.286	0.032	8.12142e-22	Macrophage
relb	4.21748e-26	10.567	0.429	0.073	8.82169e-22	Macrophage
ralb	1.1217e-25	2.32622	0.607	0.143	2.34626e-21	Macrophage
LOC103397396	1.56795e-25	2.30047	0.5	0.097	3.27968e-21	Macrophage
ar	2.51244e-25	0.804218	0.268	0.029	5.25528e-21	Macrophage
rhoq	2.62697e-25	1.42727	0.393	0.06	5.49483e-21	Macrophage
LOC103388098	2.66586e-25	0.63583	0.607	0.138	5.57618e-21	Macrophage
ap3s1	2.70587e-25	0.945795	0.393	0.059	5.65987e-21	Macrophage
ppt1	3.07967e-25	2.43	0.625	0.158	6.44174e-21	Macrophage
ncald	3.4168e-25	0.845512	0.375	0.055	7.14692e-21	Macrophage
sgpl1	3.48533e-25	0.5124	0.357	0.049	7.29026e-21	Macrophage
LOC103385009	3.51032e-25	2.68393	0.571	0.128	7.34253e-21	Macrophage
LOC103392403	6.37411e-25	1.09752	0.286	0.033	1.33327e-20	Macrophage
LOC103387093	6.89104e-25	1.35659	0.554	0.12	1.4414e-20	Macrophage
parp4	7.38232e-25	0.834768	0.321	0.041	1.54416e-20	Macrophage
LOC103387897	7.79727e-25	0.97019	0.429	0.072	1.63096e-20	Macrophage
LOC103387666	9.64501e-25	2.09808	0.518	0.107	2.01745e-20	Macrophage
arl8b	2.07585e-24	1.52436	0.536	0.114	4.34206e-20	Macrophage
LOC107990220	2.56756e-24	0.959708	0.304	0.038	5.37056e-20	Macrophage
LOC103390166	3.00289e-24	5.83759	0.875	0.444	6.28114e-20	Macrophage
hectd2	3.00827e-24	0.850748	0.321	0.043	6.29241e-20	Macrophage
ap3d1	4.849e-24	2.69883	0.696	0.197	1.01427e-19	Macrophage
pik3ap1	5.22061e-24	0.778731	0.268	0.03	1.09199e-19	Macrophage
LOC103394577	5.28369e-24	2.06038	0.607	0.156	1.10519e-19	Macrophage
nbeal2	6.1317e-24	0.544665	0.375	0.057	1.28257e-19	Macrophage
LOC103398353	6.75232e-24	0.526417	0.304	0.039	1.41238e-19	Macrophage
LOC103397349	7.19043e-24	0.406551	0.286	0.034	1.50402e-19	Macrophage
LOC103385960	7.64007e-24	0.347548	0.429	0.073	1.59807e-19	Macrophage
LOC103383287	8.54443e-24	4.51227	0.839	0.348	1.78724e-19	Macrophage
LOC103389972	1.32576e-23	2.88407	0.446	0.082	2.77309e-19	Macrophage
mapk6	1.61195e-23	1.45472	0.554	0.127	3.37173e-19	Macrophage
LOC103386932	3.76134e-23	3.02362	0.5	0.107	7.86759e-19	Macrophage
LOC103396470	6.0889e-23	1.9764	0.625	0.164	1.27361e-18	Macrophage
laptm4a	6.23957e-23	1.502	0.661	0.19	1.30513e-18	Macrophage
calm2	6.38151e-23	5.80048	1	0.601	1.33482e-18	Macrophage
casc4	8.84293e-23	2.88339	0.536	0.12	1.84968e-18	Macrophage
rsu1	9.14031e-23	0.960483	0.393	0.065	1.91188e-18	Macrophage
usp33	1.12009e-22	0.840203	0.268	0.032	2.34289e-18	Macrophage
LOC103378348	1.1289e-22	2.27121	0.5	0.107	2.36133e-18	Macrophage
LOC103392719	1.81966e-22	0.847088	0.429	0.077	3.80618e-18	Macrophage
arhgap10	1.83434e-22	1.02407	0.321	0.046	3.8369e-18	Macrophage
ywhaz	2.55686e-22	5.00155	0.875	0.418	5.34819e-18	Macrophage
tspan14	2.74421e-22	2.20757	0.589	0.154	5.74007e-18	Macrophage
dennd4b	3.10221e-22	0.777722	0.268	0.033	6.48889e-18	Macrophage
arhgap32	3.3947e-22	0.431987	0.286	0.036	7.1007e-18	Macrophage
LOC103389360	3.42413e-22	0.870843	0.339	0.05	7.16225e-18	Macrophage
LOC103390394	3.64343e-22	1.01446	0.536	0.121	7.62096e-18	Macrophage
LOC103378693	4.8646e-22	0.498489	0.304	0.041	1.01753e-17	Macrophage
kdm6b	4.9273e-22	3.16164	0.411	0.073	1.03064e-17	Macrophage
LOC103391424	6.71136e-22	0.586092	0.446	0.085	1.40381e-17	Macrophage
rassf5	7.33832e-22	0.541164	0.304	0.042	1.53496e-17	Macrophage
ophn1	7.3642e-22	0.577746	0.304	0.042	1.54037e-17	Macrophage
ND5	8.33046e-22	0.564033	0.589	0.148	1.74248e-17	Macrophage
frmd8	8.33079e-22	1.15535	0.446	0.091	1.74255e-17	Macrophage
LOC103378681	9.23234e-22	0.41986	0.625	0.161	1.93113e-17	Macrophage
idh2	1.15928e-21	0.822706	0.786	0.287	2.42487e-17	Macrophage
LOC103386293	1.39717e-21	0.812429	0.411	0.075	2.92246e-17	Macrophage
stxbp2	1.43923e-21	1.53694	0.5	0.109	3.01043e-17	Macrophage
fnbp1	1.69074e-21	3.33565	0.518	0.115	3.53651e-17	Macrophage
LOC103388899	1.74258e-21	0.834086	0.339	0.053	3.64496e-17	Macrophage
LOC103378925	1.92681e-21	1.15263	0.446	0.09	4.03031e-17	Macrophage
chmp2a	1.97924e-21	2.68551	0.589	0.158	4.13998e-17	Macrophage
galnt7	2.0784e-21	0.490744	0.268	0.034	4.34739e-17	Macrophage
ipcef1	2.80282e-21	0.755294	0.446	0.088	5.86266e-17	Macrophage
LOC103390732	2.96123e-21	1.06086	0.464	0.099	6.19401e-17	Macrophage
smim30	2.98644e-21	1.36351	0.571	0.149	6.24674e-17	Macrophage
jmjd1c	4.56032e-21	1.14784	0.339	0.053	9.53882e-17	Macrophage
wbp2nl	6.26194e-21	0.689831	0.339	0.054	1.30981e-16	Macrophage
mboat2	7.19753e-21	2.98902	0.393	0.072	1.50551e-16	Macrophage
jak1	8.36369e-21	2.20434	0.5	0.113	1.74943e-16	Macrophage
LOC103382684	8.71728e-21	2.22716	0.625	0.179	1.82339e-16	Macrophage
nudt14	1.04056e-20	0.467188	0.286	0.039	2.17654e-16	Macrophage
LOC103391641	1.074e-20	1.63044	0.375	0.065	2.24648e-16	Macrophage
exoc5	1.12296e-20	0.550396	0.268	0.035	2.34889e-16	Macrophage
LOC103389149	1.17065e-20	0.790094	0.304	0.045	2.44865e-16	Macrophage
ubald1	1.34123e-20	0.766906	0.464	0.099	2.80546e-16	Macrophage
ethe1	1.43251e-20	1.54351	0.536	0.137	2.99638e-16	Macrophage
LOC103397466	1.49994e-20	0.865434	0.339	0.054	3.13743e-16	Macrophage
ist1	1.57249e-20	1.3633	0.518	0.123	3.28917e-16	Macrophage
LOC103384278	2.36066e-20	0.852254	0.339	0.053	4.9378e-16	Macrophage
atp6v1c1	2.43475e-20	0.740173	0.446	0.092	5.09276e-16	Macrophage
atp6ap2	2.59401e-20	2.16054	0.75	0.277	5.42589e-16	Macrophage
LOC103384456	2.75948e-20	1.1237	0.429	0.086	5.77201e-16	Macrophage
golga4	4.03101e-20	1.33692	0.339	0.056	8.43167e-16	Macrophage
atp6v1d	6.39161e-20	1.21305	0.589	0.161	1.33693e-15	Macrophage
map1s	7.19723e-20	0.898464	0.375	0.067	1.50544e-15	Macrophage
prss16	7.31977e-20	1.09204	0.464	0.1	1.53108e-15	Macrophage
LOC103384016	7.76401e-20	0.67668	0.393	0.074	1.624e-15	Macrophage
LOC103396244	9.09826e-20	0.306158	0.375	0.065	1.90308e-15	Macrophage
LOC103383567	9.84452e-20	0.704507	0.268	0.037	2.05918e-15	Macrophage
prkag1	1.09286e-19	2.64756	0.661	0.209	2.28593e-15	Macrophage
bcl2l1	1.30987e-19	0.633894	0.304	0.046	2.73986e-15	Macrophage
atg3	1.38822e-19	2.07277	0.464	0.103	2.90374e-15	Macrophage
LOC103386087	1.4153e-19	0.855544	0.286	0.041	2.96038e-15	Macrophage
LOC103392614	1.54143e-19	1.51418	0.321	0.051	3.22421e-15	Macrophage
LOC103379965	1.7064e-19	3.84746	0.75	0.321	3.56928e-15	Macrophage
LOC103384367	2.15453e-19	1.43895	0.393	0.074	4.50663e-15	Macrophage
LOC103397290	2.56046e-19	2.40186	0.714	0.259	5.35572e-15	Macrophage
clta	2.59516e-19	1.16909	0.482	0.108	5.42829e-15	Macrophage
LOC112488055	2.78386e-19	0.625485	0.321	0.052	5.82301e-15	Macrophage
LOC103393287	2.81311e-19	1.15277	0.893	0.461	5.88417e-15	Macrophage
atp6v0b	3.12663e-19	1.48853	0.625	0.184	6.53998e-15	Macrophage
LOC103386063	3.13434e-19	0.51302	0.286	0.042	6.5561e-15	Macrophage
rab20	3.35555e-19	0.895052	0.321	0.053	7.0188e-15	Macrophage
LOC103381127	5.10152e-19	8.5235	0.464	0.113	1.06708e-14	Macrophage
LOC103392770	5.53356e-19	1.00336	0.446	0.097	1.15746e-14	Macrophage
ube2z	6.9611e-19	0.607306	0.321	0.053	1.45605e-14	Macrophage
LOC103391930	7.92609e-19	2.85353	0.786	0.309	1.6579e-14	Macrophage
rhbdf2	8.4924e-19	0.700159	0.304	0.047	1.77636e-14	Macrophage
gns	9.39505e-19	0.730037	0.339	0.059	1.96516e-14	Macrophage
LOC103386527	1.22504e-18	0.393319	0.268	0.038	2.56242e-14	Macrophage
LOC103381282	1.49068e-18	0.366597	0.321	0.052	3.11806e-14	Macrophage
uck1	1.5183e-18	1.47192	0.607	0.175	3.17583e-14	Macrophage
cltc	1.52623e-18	3.76895	0.625	0.192	3.19242e-14	Macrophage
LOC103396891	1.77402e-18	0.639266	0.268	0.038	3.71072e-14	Macrophage
LOC103396358	1.79314e-18	5.16884	0.768	0.323	3.75072e-14	Macrophage
LOC103386562	2.00802e-18	1.28682	0.393	0.081	4.20018e-14	Macrophage
ppm1f	2.20958e-18	0.892366	0.375	0.072	4.62177e-14	Macrophage
nrdc	2.30271e-18	1.44523	0.357	0.066	4.81657e-14	Macrophage
LOC103387400	3.03508e-18	0.771784	0.357	0.066	6.34849e-14	Macrophage
psma1	3.46629e-18	1.6435	0.625	0.194	7.25043e-14	Macrophage
LOC103399056	3.80844e-18	1.74615	0.5	0.127	7.96612e-14	Macrophage
LOC103393161	4.13824e-18	2.98144	0.339	0.062	8.65596e-14	Macrophage
vamp3	4.39277e-18	1.99732	0.571	0.164	9.18835e-14	Macrophage
LOC103384461	4.43499e-18	1.04931	0.411	0.087	9.27666e-14	Macrophage
tax1bp1	5.42499e-18	1.2761	0.768	0.304	1.13475e-13	Macrophage
ncstn	6.55705e-18	0.583063	0.446	0.098	1.37154e-13	Macrophage
LOC103379409	6.80318e-18	4.47468	0.714	0.267	1.42302e-13	Macrophage
elob	7.0271e-18	1.63345	0.696	0.251	1.46986e-13	Macrophage
efcab14	7.13648e-18	0.827177	0.339	0.062	1.49274e-13	Macrophage
mcub	7.78573e-18	1.11732	0.429	0.095	1.62854e-13	Macrophage
LOC103384916	9.01019e-18	1.30924	0.268	0.04	1.88466e-13	Macrophage
LOC103393840	1.01516e-17	0.681194	0.429	0.095	2.1234e-13	Macrophage
clint1	1.02737e-17	0.952366	0.375	0.075	2.14895e-13	Macrophage
LOC103393775	1.21998e-17	1.34072	0.446	0.107	2.55184e-13	Macrophage
LOC103380713	1.53288e-17	2.22614	0.589	0.168	3.20632e-13	Macrophage
LOC103389601	1.56708e-17	0.499447	0.268	0.04	3.27786e-13	Macrophage
pycard	1.61384e-17	0.417779	0.286	0.045	3.37567e-13	Macrophage
LOC103391298	2.77616e-17	0.771688	0.339	0.062	5.8069e-13	Macrophage
rab24	3.32039e-17	0.623122	0.339	0.063	6.94527e-13	Macrophage
mboat7	4.51345e-17	0.854011	0.464	0.115	9.44078e-13	Macrophage
LOC103391409	5.03903e-17	2.20711	0.554	0.174	1.05401e-12	Macrophage
capns1	5.43753e-17	3.77034	0.696	0.256	1.13737e-12	Macrophage
tmbim6	5.51065e-17	4.63658	0.732	0.301	1.15266e-12	Macrophage
LOC103385527	5.54997e-17	2.03555	0.429	0.098	1.16089e-12	Macrophage
LOC103393684	6.35272e-17	2.83262	0.589	0.181	1.3288e-12	Macrophage
bloc1s6	6.76532e-17	0.433696	0.268	0.041	1.4151e-12	Macrophage
LOC103391662	7.96905e-17	2.70819	0.482	0.121	1.66689e-12	Macrophage
LOC103398693	8.25695e-17	7.77636	0.321	0.059	1.72711e-12	Macrophage
LOC103388351	8.54884e-17	0.684937	0.429	0.097	1.78816e-12	Macrophage
LOC107990082	9.67014e-17	1.12738	0.321	0.058	2.0227e-12	Macrophage
LOC103381417	9.68104e-17	0.665446	0.357	0.071	2.02498e-12	Macrophage
gpr108	1.19721e-16	0.949543	0.375	0.078	2.5042e-12	Macrophage
LOC103376760	1.27607e-16	0.321275	0.393	0.083	2.66915e-12	Macrophage
LOC103385471	1.61594e-16	1.14836	0.518	0.143	3.38007e-12	Macrophage
vcl	1.77414e-16	0.632007	0.339	0.065	3.71097e-12	Macrophage
rexo1	1.87435e-16	0.925423	0.321	0.059	3.92058e-12	Macrophage
LOC103398944	2.26849e-16	0.64125	0.375	0.078	4.745e-12	Macrophage
bbx	2.38927e-16	0.802699	0.268	0.042	4.99764e-12	Macrophage
snx5	2.41226e-16	1.55682	0.429	0.105	5.04572e-12	Macrophage
txndc11	2.62464e-16	0.579929	0.321	0.06	5.48997e-12	Macrophage
LOC103395927	2.7361e-16	0.95788	0.286	0.048	5.7231e-12	Macrophage
mtm1	3.42323e-16	0.807392	0.286	0.048	7.16036e-12	Macrophage
LOC103393860	3.73798e-16	4.40443	0.786	0.352	7.81872e-12	Macrophage
LOC103378260	4.19015e-16	2.7811	0.393	0.088	8.76453e-12	Macrophage
arf1	4.65439e-16	0.834879	0.411	0.097	9.73558e-12	Macrophage
ssr1	5.67753e-16	1.85805	0.696	0.257	1.18757e-11	Macrophage
psmb8	6.68129e-16	0.993723	0.696	0.247	1.39753e-11	Macrophage
LOC103390972	6.99495e-16	1.64556	0.393	0.092	1.46313e-11	Macrophage
dync1h1	7.17542e-16	2.08732	0.589	0.188	1.50088e-11	Macrophage
LOC103394414	7.48472e-16	0.765759	0.536	0.15	1.56558e-11	Macrophage
slc16a7	7.708e-16	0.57131	0.268	0.044	1.61228e-11	Macrophage
LOC103382992	7.71929e-16	1.57002	0.571	0.186	1.61464e-11	Macrophage
calm3	8.04639e-16	5.34989	0.536	0.155	1.68306e-11	Macrophage
LOC103385958	8.32784e-16	3.34632	0.661	0.244	1.74193e-11	Macrophage
b3gnt2	9.0786e-16	0.321963	0.286	0.049	1.89897e-11	Macrophage
psmb1	9.93007e-16	1.09613	0.732	0.297	2.07707e-11	Macrophage
plp2	1.48615e-15	1.96218	0.518	0.145	3.10859e-11	Macrophage
dock11	1.87087e-15	0.699364	0.393	0.09	3.9133e-11	Macrophage
nfkb1	2.14548e-15	0.965129	0.321	0.064	4.4877e-11	Macrophage
acbd7	2.17238e-15	2.72006	0.5	0.148	4.54397e-11	Macrophage
LOC103388342	2.6042e-15	2.04044	0.554	0.172	5.44721e-11	Macrophage
casp9	2.66007e-15	0.514599	0.286	0.05	5.56406e-11	Macrophage
LOC103393535	2.75229e-15	1.54393	0.5	0.142	5.75697e-11	Macrophage
rpe	3.03868e-15	3.86331	0.571	0.189	6.35601e-11	Macrophage
asxl2	4.27742e-15	0.609634	0.286	0.052	8.94708e-11	Macrophage
vps26b	4.30063e-15	1.51328	0.446	0.118	8.99562e-11	Macrophage
LOC103383414	4.73256e-15	0.637264	0.357	0.077	9.89909e-11	Macrophage
ttpa	4.73404e-15	1.05023	0.375	0.086	9.9022e-11	Macrophage
LOC103384338	5.17726e-15	1.44687	0.536	0.165	1.08293e-10	Macrophage
LOC103385079	5.20278e-15	0.598402	0.304	0.057	1.08827e-10	Macrophage
LOC103387916	5.34766e-15	0.559986	0.339	0.07	1.11857e-10	Macrophage
LOC103384708	5.59072e-15	0.335199	0.768	0.333	1.16941e-10	Macrophage
wasf2	7.57345e-15	0.625806	0.554	0.172	1.58414e-10	Macrophage
LOC103386565	7.7479e-15	1.0285	0.393	0.093	1.62063e-10	Macrophage
stat3	8.42995e-15	1.63751	0.518	0.156	1.76329e-10	Macrophage
galk1	8.74029e-15	0.7117	0.268	0.047	1.82821e-10	Macrophage
lamp2	8.96656e-15	3.6558	0.482	0.136	1.87554e-10	Macrophage
nek7	9.2806e-15	0.568615	0.304	0.058	1.94122e-10	Macrophage
LOC103392437	9.34285e-15	0.513082	0.393	0.095	1.95424e-10	Macrophage
tyk2	9.46117e-15	0.27842	0.286	0.051	1.97899e-10	Macrophage
LOC103387073	1.0994e-14	0.674374	0.304	0.058	2.29961e-10	Macrophage
acp2	1.11602e-14	0.867661	0.286	0.054	2.33439e-10	Macrophage
glyr1	1.55584e-14	1.85008	0.607	0.218	3.25436e-10	Macrophage
LOC103394440	1.90739e-14	0.989069	0.393	0.094	3.98969e-10	Macrophage
scamp2	2.46591e-14	1.58733	0.321	0.068	5.15794e-10	Macrophage
LOC103392347	3.77495e-14	0.962905	0.411	0.105	7.89606e-10	Macrophage
2021-09-06	3.83603e-14	0.854392	0.5	0.14	8.02382e-10	Macrophage
tent4a	4.14798e-14	0.422763	0.286	0.054	8.67632e-10	Macrophage
LOC112487579	4.23432e-14	0.329006	0.268	0.048	8.85692e-10	Macrophage
r3hcc1l	4.27273e-14	0.745662	0.286	0.055	8.93726e-10	Macrophage
LOC103383064	4.56592e-14	0.360038	0.375	0.086	9.55054e-10	Macrophage
LOC103397380	4.89007e-14	0.662896	0.625	0.245	1.02286e-09	Macrophage
LOC103393632	5.64854e-14	1.08248	0.375	0.089	1.1815e-09	Macrophage
LOC103381914	6.47881e-14	6.02365	0.661	0.257	1.35517e-09	Macrophage
aip	6.48224e-14	1.22053	0.518	0.157	1.35589e-09	Macrophage
flii	7.09463e-14	0.455232	0.286	0.055	1.48398e-09	Macrophage
irf2	7.11185e-14	0.465923	0.304	0.06	1.48759e-09	Macrophage
oaz1	8.83066e-14	1.57083	0.768	0.383	1.84711e-09	Macrophage
ric8b	9.63867e-14	0.349267	0.268	0.049	2.01612e-09	Macrophage
tmem128	1.0532e-13	1.87574	0.554	0.179	2.20298e-09	Macrophage
abcd1	1.59408e-13	0.316336	0.268	0.05	3.33433e-09	Macrophage
mea1	1.63777e-13	0.576887	0.268	0.05	3.42573e-09	Macrophage
hars	1.88511e-13	3.42063	0.536	0.174	3.94308e-09	Macrophage
LOC103396514	2.0791e-13	0.337278	0.393	0.097	4.34886e-09	Macrophage
LOC103391312	2.09831e-13	0.533237	0.304	0.064	4.38904e-09	Macrophage
sort1	2.11525e-13	0.588998	0.286	0.057	4.42446e-09	Macrophage
LOC103398606	2.39938e-13	1.88345	0.661	0.276	5.01878e-09	Macrophage
tial1	2.48251e-13	0.50367	0.286	0.057	5.19266e-09	Macrophage
chmp1a	2.6296e-13	0.801086	0.357	0.084	5.50032e-09	Macrophage
LOC103389110	2.77824e-13	1.16772	0.5	0.162	5.81124e-09	Macrophage
LOC103398981	4.33246e-13	0.666931	0.304	0.064	9.06221e-09	Macrophage
LOC112486586	5.306e-13	1.4612	0.393	0.103	1.10986e-08	Macrophage
LOC103385394	5.79847e-13	1.09307	0.339	0.082	1.21287e-08	Macrophage
LOC103381986	6.84129e-13	0.856127	0.661	0.261	1.43099e-08	Macrophage
grk3	7.21083e-13	0.57302	0.268	0.052	1.50829e-08	Macrophage
jpt2	7.3818e-13	1.67827	0.554	0.193	1.54405e-08	Macrophage
LOC103396890	8.85942e-13	0.667785	0.321	0.073	1.85313e-08	Macrophage
pak2	9.2042e-13	0.752214	0.464	0.135	1.92524e-08	Macrophage
foxn2	9.68401e-13	1.44272	0.304	0.068	2.0256e-08	Macrophage
nagk	1.24841e-12	0.93681	0.411	0.114	2.6113e-08	Macrophage
LOC103387313	1.24913e-12	0.517241	0.393	0.105	2.6128e-08	Macrophage
smarca2	1.34911e-12	1.19203	0.429	0.123	2.82194e-08	Macrophage
rnf10	1.40309e-12	0.615088	0.375	0.097	2.93483e-08	Macrophage
tmem164	1.60977e-12	0.674652	0.375	0.097	3.36716e-08	Macrophage
ctsz	1.87759e-12	0.477104	0.286	0.06	3.92735e-08	Macrophage
LOC103398200	2.0442e-12	1.9192	0.554	0.2	4.27585e-08	Macrophage
m6pr	2.2397e-12	1.07006	0.357	0.089	4.68479e-08	Macrophage
pepd	2.30139e-12	0.90647	0.321	0.075	4.81381e-08	Macrophage
LOC103383113	2.51901e-12	0.589217	0.268	0.054	5.26901e-08	Macrophage
tpm1	2.6619e-12	0.471855	0.518	0.17	5.5679e-08	Macrophage
pef1	2.78249e-12	0.924104	0.357	0.09	5.82012e-08	Macrophage
LOC103388099	3.53931e-12	0.51567	0.339	0.084	7.40318e-08	Macrophage
ap2s1	3.55658e-12	0.783961	0.536	0.184	7.4393e-08	Macrophage
atp5if1	3.57589e-12	4.90955	0.625	0.286	7.47968e-08	Macrophage
LOC103395669	4.21249e-12	0.827065	0.321	0.078	8.81126e-08	Macrophage
arcn1	4.501e-12	0.447324	0.482	0.151	9.41474e-08	Macrophage
itgav	5.21817e-12	0.888195	0.393	0.11	1.09148e-07	Macrophage
snap23	5.25562e-12	0.43922	0.429	0.123	1.09932e-07	Macrophage
LOC103389989	5.6653e-12	0.988692	0.393	0.112	1.18501e-07	Macrophage
dennd2d	5.76758e-12	0.357404	0.304	0.068	1.2064e-07	Macrophage
LOC107989126	6.30005e-12	0.395433	0.268	0.055	1.31778e-07	Macrophage
gpd1l	6.71706e-12	0.490514	0.321	0.077	1.40501e-07	Macrophage
myd88	7.62926e-12	0.916179	0.393	0.11	1.59581e-07	Macrophage
LOC103377018	8.53335e-12	1.2143	0.607	0.24	1.78492e-07	Macrophage
med15	8.77139e-12	0.500512	0.464	0.144	1.83471e-07	Macrophage
ndfip2	9.32094e-12	1.02083	0.518	0.174	1.94966e-07	Macrophage
osbpl9	9.43475e-12	2.30075	0.446	0.146	1.97347e-07	Macrophage
rragc	1.10791e-11	0.910354	0.375	0.104	2.31741e-07	Macrophage
vwa5a	1.23609e-11	1.83843	0.357	0.095	2.58552e-07	Macrophage
clpx	1.49182e-11	1.36996	0.304	0.072	3.12045e-07	Macrophage
LOC103386555	1.52872e-11	2.04686	0.304	0.07	3.19763e-07	Macrophage
tmed10	1.72151e-11	2.05617	0.554	0.225	3.60089e-07	Macrophage
ptbp1	2.22098e-11	0.601852	0.321	0.08	4.64562e-07	Macrophage
LOC103394810	2.57916e-11	1.21	0.518	0.192	5.39484e-07	Macrophage
LOC103395914	2.58602e-11	0.7715	0.482	0.161	5.40918e-07	Macrophage
hexb	2.68159e-11	0.747072	0.554	0.203	5.60908e-07	Macrophage
LOC103383558	3.13555e-11	0.636842	0.464	0.152	6.55864e-07	Macrophage
kmt2d	3.4494e-11	2.59189	0.518	0.182	7.21512e-07	Macrophage
LOC103386496	3.57791e-11	0.431269	0.357	0.093	7.48391e-07	Macrophage
LOC103379063	3.75208e-11	2.5671	0.518	0.181	7.84822e-07	Macrophage
LOC103392363	3.75474e-11	0.659986	0.464	0.155	7.85379e-07	Macrophage
LOC103380169	3.98661e-11	0.784328	0.554	0.209	8.33879e-07	Macrophage
ralgps2	4.17687e-11	1.45743	0.286	0.066	8.73675e-07	Macrophage
atg7	4.56349e-11	0.492521	0.411	0.121	9.54545e-07	Macrophage
prex1	5.42311e-11	0.779549	0.268	0.058	1.13435e-06	Macrophage
LOC103377382	5.48152e-11	0.64901	0.357	0.099	1.14657e-06	Macrophage
LOC103384950	5.77792e-11	0.564673	0.304	0.074	1.20857e-06	Macrophage
il15ra	6.57529e-11	2.00974	0.589	0.244	1.37535e-06	Macrophage
psenen	6.62916e-11	0.441117	0.518	0.185	1.38662e-06	Macrophage
LOC103379313	6.6916e-11	0.691278	0.268	0.06	1.39968e-06	Macrophage
LOC103382987	6.69715e-11	1.95559	0.464	0.153	1.40084e-06	Macrophage
vps25	6.86406e-11	0.434492	0.268	0.06	1.43576e-06	Macrophage
LOC103383782	7.37039e-11	0.478371	0.321	0.082	1.54166e-06	Macrophage
LOC103396440	7.89659e-11	3.24474	0.554	0.236	1.65173e-06	Macrophage
LOC103397973	9.46532e-11	0.560258	0.304	0.075	1.97986e-06	Macrophage
mycbp2	9.80277e-11	1.04415	0.393	0.118	2.05045e-06	Macrophage
usp8	9.96693e-11	0.920242	0.357	0.1	2.08478e-06	Macrophage
ap2m1	1.0836e-10	1.7819	0.571	0.259	2.26656e-06	Macrophage
LOC103398552	1.12291e-10	0.495026	0.304	0.074	2.34879e-06	Macrophage
ssh2	1.16307e-10	1.15119	0.446	0.152	2.4328e-06	Macrophage
tmem131	1.31183e-10	0.362532	0.321	0.082	2.74396e-06	Macrophage
cmtm6	1.42351e-10	8.37283	0.375	0.113	2.97755e-06	Macrophage
fam3c	1.45578e-10	0.281318	0.304	0.074	3.04506e-06	Macrophage
rab21	1.55487e-10	0.761213	0.286	0.07	3.25232e-06	Macrophage
bcl10	1.73758e-10	0.279281	0.268	0.06	3.6345e-06	Macrophage
LOC103399940	1.92895e-10	0.65427	0.339	0.095	4.03478e-06	Macrophage
bhlhe40	2.80053e-10	4.84225	0.357	0.104	5.85787e-06	Macrophage
casp6	2.91448e-10	0.382081	0.375	0.108	6.09621e-06	Macrophage
rdh10	2.92123e-10	1.42791	0.268	0.064	6.11034e-06	Macrophage
LOC103380927	3.46819e-10	0.967289	0.339	0.095	7.25441e-06	Macrophage
LOC103381306	3.72139e-10	0.48282	0.411	0.132	7.78403e-06	Macrophage
LOC103385603	3.76059e-10	1.64089	0.571	0.244	7.86603e-06	Macrophage
spcs2	3.9662e-10	0.456064	0.661	0.283	8.2961e-06	Macrophage
LOC103395999	4.02016e-10	0.425726	0.357	0.101	8.40897e-06	Macrophage
st13	4.48956e-10	0.912705	0.554	0.222	9.39081e-06	Macrophage
vps4b	4.71682e-10	0.648834	0.339	0.096	9.86617e-06	Macrophage
psmd3	4.73194e-10	0.566834	0.5	0.182	9.89779e-06	Macrophage
chmp1b	6.07681e-10	0.551873	0.464	0.169	1.27109e-05	Macrophage
LOC103394883	6.79874e-10	0.582071	0.286	0.073	1.42209e-05	Macrophage
LOC103391554	7.32106e-10	0.538403	0.268	0.065	1.53135e-05	Macrophage
LOC103383913	7.37215e-10	0.620959	0.375	0.113	1.54203e-05	Macrophage
spg21	7.63655e-10	0.454116	0.393	0.124	1.59734e-05	Macrophage
pxk	8.07708e-10	0.521417	0.321	0.091	1.68948e-05	Macrophage
nkiras2	8.24924e-10	0.794713	0.357	0.104	1.72549e-05	Macrophage
wdr81	8.39666e-10	0.503898	0.268	0.065	1.75633e-05	Macrophage
LOC103386459	9.43673e-10	1.4487	0.375	0.12	1.97388e-05	Macrophage
rab2a	1.05116e-09	1.01142	0.5	0.199	2.19871e-05	Macrophage
LOC103398746	1.12272e-09	0.64521	0.304	0.083	2.34839e-05	Macrophage
LOC103391561	1.28964e-09	0.758926	0.286	0.076	2.69753e-05	Macrophage
srpk1	1.32244e-09	1.14426	0.518	0.213	2.76615e-05	Macrophage
serinc1	1.3638e-09	1.14971	0.625	0.283	2.85267e-05	Macrophage
LOC103396471	1.54409e-09	0.425337	0.286	0.074	3.22978e-05	Macrophage
leprot	1.63117e-09	0.776499	0.375	0.115	3.41191e-05	Macrophage
ube2v2	2.05808e-09	1.68103	0.607	0.313	4.30488e-05	Macrophage
LOC103390182	2.35389e-09	0.419557	0.286	0.074	4.92363e-05	Macrophage
cyth1	2.36143e-09	0.493489	0.339	0.101	4.9394e-05	Macrophage
hnrnpk	2.36414e-09	0.578216	0.411	0.139	4.94508e-05	Macrophage
LOC103395929	2.68677e-09	0.808974	0.375	0.119	5.61992e-05	Macrophage
zdhhc13	2.89624e-09	0.516538	0.446	0.159	6.05807e-05	Macrophage
baz1b	3.06775e-09	0.356833	0.554	0.223	6.41681e-05	Macrophage
LOC103393219	3.30012e-09	0.763033	0.375	0.12	6.90286e-05	Macrophage
maf1	3.70764e-09	0.95624	0.714	0.397	7.75527e-05	Macrophage
cd82	4.05724e-09	1.09239	0.304	0.084	8.48654e-05	Macrophage
pacs1	4.17527e-09	0.364498	0.268	0.068	8.73341e-05	Macrophage
cmpk1	4.97133e-09	1.60593	0.5	0.203	0.000103985	Macrophage
tbccd1	5.14252e-09	0.423618	0.268	0.069	0.000107566	Macrophage
LOC103391805	5.94908e-09	0.779291	0.411	0.148	0.000124437	Macrophage
LOC103394070	6.03553e-09	0.798049	0.411	0.146	0.000126245	Macrophage
hps5	8.28177e-09	0.256338	0.268	0.071	0.00017323	Macrophage
LOC103398058	8.60516e-09	1.02219	0.357	0.115	0.000179994	Macrophage
tfeb	8.9684e-09	0.900162	0.304	0.088	0.000187592	Macrophage
rasgrp2	9.99499e-09	0.505048	0.339	0.109	0.000209065	Macrophage
irf2bp2	1.13744e-08	0.648635	0.339	0.107	0.000237919	Macrophage
LOC103399892	1.2029e-08	1.41597	0.321	0.098	0.000251611	Macrophage
sars	1.22759e-08	0.31312	0.304	0.088	0.000256775	Macrophage
gabarap	1.2632e-08	1.49554	0.643	0.332	0.000264223	Macrophage
psmc1	1.28886e-08	0.726193	0.536	0.23	0.00026959	Macrophage
LOC103377456	1.31998e-08	0.624488	0.357	0.116	0.0002761	Macrophage
znf207	1.47937e-08	0.432874	0.411	0.147	0.00030944	Macrophage
LOC103398911	1.53357e-08	2.15306	0.411	0.153	0.000320778	Macrophage
LOC103387977	1.63194e-08	1.15558	0.304	0.087	0.000341354	Macrophage
syap1	1.83932e-08	1.01368	0.464	0.182	0.000384731	Macrophage
msra	2.06261e-08	0.410988	0.286	0.08	0.000431436	Macrophage
LOC103382147	2.17439e-08	1.06826	0.339	0.109	0.000454818	Macrophage
LOC103387031	2.2183e-08	0.256632	0.286	0.079	0.000464002	Macrophage
snx6	2.30074e-08	0.75946	0.589	0.278	0.000481245	Macrophage
ampd2	2.40964e-08	0.540402	0.268	0.074	0.000504024	Macrophage
LOC103385808	2.47286e-08	0.690534	0.643	0.337	0.000517248	Macrophage
hmgn3	2.96813e-08	1.44898	0.339	0.109	0.000620843	Macrophage
map3k2	3.12406e-08	1.70445	0.411	0.15	0.000653459	Macrophage
hyou1	3.87376e-08	0.775962	0.286	0.083	0.000810274	Macrophage
mfap1	4.19223e-08	0.792915	0.393	0.138	0.000876889	Macrophage
snx12	4.74297e-08	0.631067	0.393	0.141	0.000992087	Macrophage
csde1	4.92052e-08	1.6574	0.482	0.2	0.00102923	Macrophage
hsdl2	5.19305e-08	0.694094	0.375	0.137	0.00108623	Macrophage
LOC103386032	5.21482e-08	1.27229	0.446	0.185	0.00109078	Macrophage
ppp1r12a	6.18535e-08	0.767317	0.429	0.167	0.00129379	Macrophage
vps29	6.52065e-08	0.736823	0.536	0.249	0.00136392	Macrophage
sdf4	6.73105e-08	0.402928	0.321	0.103	0.00140793	Macrophage
rab41	7.38582e-08	0.865396	0.304	0.095	0.00154489	Macrophage
eif5a	7.58901e-08	0.557111	0.429	0.164	0.00158739	Macrophage
tbcb	9.45724e-08	3.17351	0.393	0.141	0.00197817	Macrophage
arfip1	9.86063e-08	0.712303	0.304	0.096	0.00206255	Macrophage
LOC103386989	1.13021e-07	0.622108	0.286	0.087	0.00236406	Macrophage
hectd1	1.15468e-07	0.355499	0.286	0.086	0.00241524	Macrophage
cope	1.2574e-07	0.988607	0.518	0.239	0.00263011	Macrophage
myo9b	1.31867e-07	0.394829	0.268	0.077	0.00275827	Macrophage
LOC103393591	1.40957e-07	0.527498	0.411	0.151	0.00294841	Macrophage
fam3a	1.41358e-07	0.479302	0.286	0.089	0.00295679	Macrophage
LOC103386057	1.43524e-07	0.523865	0.375	0.142	0.00300209	Macrophage
LOC103392321	1.494e-07	0.46469	0.429	0.17	0.00312501	Macrophage
LOC103396595	1.54183e-07	0.287312	0.536	0.248	0.00322505	Macrophage
LOC103394996	1.66834e-07	0.483536	0.321	0.108	0.00348966	Macrophage
LOC103396045	1.71403e-07	0.473654	0.357	0.126	0.00358523	Macrophage
LOC103386436	1.71909e-07	0.51754	0.411	0.154	0.00359582	Macrophage
tmed9	1.98429e-07	0.497388	0.554	0.276	0.00415054	Macrophage
LOC103386454	2.41266e-07	0.273562	0.5	0.227	0.00504655	Macrophage
ppp2r5a	2.67366e-07	0.377312	0.339	0.12	0.0055925	Macrophage
mfsd6	2.71944e-07	0.32536	0.286	0.089	0.00568824	Macrophage
slc10a3	2.86813e-07	0.474386	0.411	0.163	0.00599926	Macrophage
hyal1	3.12231e-07	1.12397	0.339	0.115	0.00653094	Macrophage
LOC103388044	3.26922e-07	0.497511	0.286	0.09	0.00683823	Macrophage
LOC103394004	3.4256e-07	0.570877	0.5	0.221	0.00716532	Macrophage
rgs14	3.51836e-07	0.807513	0.589	0.3	0.00735936	Macrophage
rpn1	4.54906e-07	1.15236	0.357	0.131	0.00951527	Macrophage
LOC103381207	4.79091e-07	2.44318	0.393	0.154	0.0100211	Macrophage
LOC103376735	5.35086e-07	0.610226	0.5	0.222	0.0111924	Macrophage
LOC103388956	5.80929e-07	2.04876	0.286	0.096	0.0121513	Macrophage
csnk1a1	6.85665e-07	1.04399	0.464	0.214	0.014342	Macrophage
fam193a	7.50724e-07	0.475462	0.304	0.104	0.0157029	Macrophage
LOC103392749	7.84886e-07	0.814583	0.429	0.19	0.0164175	Macrophage
kras	7.87443e-07	0.464098	0.446	0.186	0.0164709	Macrophage
commd7	8.95376e-07	0.550048	0.304	0.105	0.0187286	Macrophage
LOC103390444	9.42897e-07	1.8861	0.268	0.087	0.0197226	Macrophage
lbr	9.87776e-07	0.665783	0.304	0.104	0.0206613	Macrophage
vta1	1.17813e-06	0.546043	0.286	0.095	0.0246429	Macrophage
LOC103379701	1.26448e-06	1.32381	0.429	0.191	0.0264492	Macrophage
asmtl	1.41102e-06	0.652366	0.268	0.089	0.0295144	Macrophage
unc93b1	1.59803e-06	0.614502	0.339	0.129	0.033426	Macrophage
LOC103393631	1.69073e-06	0.429217	0.411	0.172	0.035365	Macrophage
mif	1.91979e-06	0.453624	0.375	0.153	0.0401563	Macrophage
LOC103396385	2.02419e-06	0.451154	0.268	0.089	0.04234	Macrophage
LOC103395739	2.06844e-06	0.768718	0.411	0.18	0.0432655	Macrophage
qars	2.3219e-06	0.858994	0.411	0.181	0.0485671	Macrophage

## Sheet: Erythrocyte
Gene	p_val	avg_logFC	pct.1	pct.2	p_val_adj	cluster
LOC103378707	0	118.168	0.991	0.742	0	Erythrocyte
LOC103392591	0	93.1606	0.84	0.121	0	Erythrocyte
LOC103384928	0	43.1776	0.985	0.238	0	Erythrocyte
LOC103378773	0	43.0323	0.68	0.094	0	Erythrocyte
LOC103395063	0	28.2194	0.958	0.153	0	Erythrocyte
cda	0	23.0405	0.999	0.439	0	Erythrocyte
LOC103396641	0	22.267	0.646	0.05	0	Erythrocyte
LOC103384491	0	21.954	0.725	0.045	0	Erythrocyte
LOC103397081	0	18.3915	0.646	0.121	0	Erythrocyte
LOC103396248	0	17.9971	0.936	0.103	0	Erythrocyte
LOC103386358	0	15.6255	0.491	0.038	0	Erythrocyte
LOC103379089	0	14.336	0.984	0.616	0	Erythrocyte
LOC103388490	0	12.5609	0.905	0.229	0	Erythrocyte
LOC103384936	0	12.1748	0.847	0.094	0	Erythrocyte
wbp4	0	11.8821	0.86	0.168	0	Erythrocyte
slc1a5	0	11.409	0.955	0.284	0	Erythrocyte
LOC107989961	0	10.5321	0.65	0.112	0	Erythrocyte
LOC103389469	0	10.2651	0.932	0.089	0	Erythrocyte
LOC103396196	0	9.88514	0.955	0.273	0	Erythrocyte
LOC103381837	0	9.63482	0.869	0.081	0	Erythrocyte
slc4a1	0	9.13577	0.659	0.049	0	Erythrocyte
LOC103393839	0	7.85752	0.799	0.127	0	Erythrocyte
LOC103393911	0	7.5745	0.678	0.047	0	Erythrocyte
atf5	0	6.79011	0.591	0.038	0	Erythrocyte
LOC103378517	0	6.61917	0.545	0.068	0	Erythrocyte
creg1	0	5.70617	0.877	0.27	0	Erythrocyte
LOC103389524	0	5.68781	0.835	0.081	0	Erythrocyte
LOC103393430	0	5.38731	0.686	0.089	0	Erythrocyte
rhag	0	4.75818	0.66	0.044	0	Erythrocyte
LOC103395851	0	4.39753	0.551	0.028	0	Erythrocyte
trmo	0	3.67061	0.611	0.073	0	Erythrocyte
psmb8	0	3.52348	0.789	0.188	0	Erythrocyte
LOC103389431	0	3.31704	0.575	0.029	0	Erythrocyte
LOC103384077	0	3.28276	0.572	0.05	0	Erythrocyte
LOC103396437	0	3.24181	0.558	0.063	0	Erythrocyte
LOC103398010	0	3.04992	0.626	0.033	0	Erythrocyte
ell2	0	2.67358	0.61	0.098	0	Erythrocyte
LOC103386687	0	2.51366	0.659	0.043	0	Erythrocyte
LOC103382307	0	2.44688	0.527	0.04	0	Erythrocyte
LOC103379801	0	2.18537	0.841	0.143	0	Erythrocyte
LOC103388017	0	2.07584	0.427	0.033	0	Erythrocyte
st3gal4	0	2.04183	0.615	0.092	0	Erythrocyte
LOC103385531	0	1.88119	0.579	0.035	0	Erythrocyte
LOC107989847	0	1.68615	0.388	0.023	0	Erythrocyte
LOC103397216	0	1.51617	0.377	0.018	0	Erythrocyte
LOC103380045	0	1.47926	0.486	0.039	0	Erythrocyte
LOC103396034	0	1.37266	0.388	0.025	0	Erythrocyte
ripor3	0	1.23842	0.407	0.023	0	Erythrocyte
LOC103398660	0	1.19464	0.37	0.021	0	Erythrocyte
LOC103398145	0	1.13566	0.367	0.01	0	Erythrocyte
LOC103383650	0	0.900346	0.753	0.175	0	Erythrocyte
LOC103384324	2.72048e-307	15.1678	0.843	0.344	5.69043e-303	Erythrocyte
LOC103396770	1.15781e-290	1.82616	0.542	0.081	2.42178e-286	Erythrocyte
jph1	2.15916e-284	1.1708	0.274	0.01	4.51632e-280	Erythrocyte
gp1bb	4.52112e-280	0.909179	0.332	0.021	9.45683e-276	Erythrocyte
LOC103393838	1.69272e-277	1.27804	0.507	0.072	3.54067e-273	Erythrocyte
grxcr2	7.97424e-276	1.03873	0.255	0.008	1.66797e-271	Erythrocyte
misp	6.72485e-272	0.828621	0.332	0.023	1.40664e-267	Erythrocyte
LOC103392963	1.54679e-271	1.06673	0.344	0.025	3.23543e-267	Erythrocyte
LOC103393837	9.0313e-271	3.10823	0.615	0.123	1.88908e-266	Erythrocyte
LOC112486416	2.48969e-259	7.32574	0.392	0.041	5.20768e-255	Erythrocyte
LOC103385066	5.20517e-259	1.58213	0.449	0.057	1.08876e-254	Erythrocyte
LOC103396747	1.68263e-257	6.08313	0.444	0.058	3.51956e-253	Erythrocyte
psme2	9.69533e-247	11.7657	0.766	0.261	2.02797e-242	Erythrocyte
LOC103389295	1.20014e-244	4.05278	0.636	0.15	2.51033e-240	Erythrocyte
LOC103396000	1.54835e-240	1.03726	0.846	0.291	3.23869e-236	Erythrocyte
gse1	8.634e-240	2.03767	0.477	0.075	1.80597e-235	Erythrocyte
slc7a5	2.8164e-238	3.46939	0.55	0.107	5.89106e-234	Erythrocyte
LOC107988508	9.92439e-235	0.799663	0.289	0.02	2.07588e-230	Erythrocyte
LOC103378618	6.4156e-234	1.32203	0.374	0.041	1.34195e-229	Erythrocyte
LOC103377062	1.46179e-227	9.07141	0.547	0.112	3.05763e-223	Erythrocyte
nt5dc2	2.78564e-221	2.05394	0.526	0.105	5.82673e-217	Erythrocyte
LOC103387600	3.22897e-217	0.906363	0.336	0.035	6.75403e-213	Erythrocyte
ddit4	3.92978e-215	2.02598	0.402	0.057	8.21993e-211	Erythrocyte
LOC103393884	2.07855e-212	0.720288	0.618	0.16	4.3477e-208	Erythrocyte
ncoa4	4.45847e-211	7.87237	0.782	0.316	9.32579e-207	Erythrocyte
LOC103382515	4.93723e-210	18.1178	0.821	0.369	1.03272e-205	Erythrocyte
hpgd	3.7207e-209	0.970143	0.29	0.025	7.78258e-205	Erythrocyte
LOC103385521	1.56216e-205	0.640875	0.341	0.039	3.26756e-201	Erythrocyte
LOC103382516	9.00136e-204	2.52414	0.443	0.078	1.88281e-199	Erythrocyte
aamdc	1.12155e-201	1.22253	0.36	0.047	2.34595e-197	Erythrocyte
LOC103398005	2.75429e-198	3.28623	0.351	0.044	5.76115e-194	Erythrocyte
LOC103397494	2.30748e-197	0.640202	0.255	0.019	4.82656e-193	Erythrocyte
hipk2	3.00825e-197	1.88459	0.394	0.06	6.29236e-193	Erythrocyte
rbm24	3.26375e-196	1.2356	0.252	0.019	6.82678e-192	Erythrocyte
LOC103393013	4.08566e-193	0.865679	0.256	0.02	8.54598e-189	Erythrocyte
piezo1	1.91446e-188	1.6313	0.343	0.045	4.00449e-184	Erythrocyte
tmod4	1.08e-184	0.653771	0.252	0.021	2.25903e-180	Erythrocyte
chac1	3.12585e-182	10.0383	0.615	0.192	6.53834e-178	Erythrocyte
LOC103398730	4.98509e-182	184.188	0.541	0.154	1.04273e-177	Erythrocyte
LOC103392356	4.38537e-179	5.00129	0.382	0.062	9.17287e-175	Erythrocyte
LOC103382906	1.03339e-175	1.0662	0.461	0.095	2.16155e-171	Erythrocyte
ak3	1.4246e-168	2.03032	0.293	0.035	2.97983e-164	Erythrocyte
LOC103396127	1.52021e-167	0.841369	0.256	0.025	3.17983e-163	Erythrocyte
foxo3	2.29529e-167	0.856817	0.263	0.027	4.80105e-163	Erythrocyte
ak1	4.11114e-167	10.1174	0.39	0.072	8.59927e-163	Erythrocyte
daglb	3.52398e-166	1.6135	0.411	0.079	7.37111e-162	Erythrocyte
LOC103386459	1.5051e-156	1.5701	0.417	0.088	3.14822e-152	Erythrocyte
psme1	6.20026e-150	8.55243	0.71	0.303	1.29691e-145	Erythrocyte
mknk2	1.01503e-149	16.9677	0.862	0.51	2.12313e-145	Erythrocyte
LOC103390726	1.30825e-146	4.47021	0.496	0.141	2.73647e-142	Erythrocyte
myo7a	4.31197e-144	1.03411	0.363	0.07	9.01934e-140	Erythrocyte
sptan1	4.78148e-144	2.88419	0.589	0.199	1.00014e-139	Erythrocyte
pdap1	2.92364e-143	1.69501	0.455	0.114	6.11537e-139	Erythrocyte
nfe2l2	1.90086e-142	0.772798	0.335	0.059	3.97604e-138	Erythrocyte
cbfa2t3	1.07993e-137	0.643387	0.268	0.037	2.25888e-133	Erythrocyte
LOC103394340	1.15811e-137	0.966856	0.4	0.089	2.42241e-133	Erythrocyte
yars	1.04393e-136	3.88436	0.285	0.044	2.18358e-132	Erythrocyte
LOC103377786	4.69274e-135	1.14778	0.295	0.048	9.8158e-131	Erythrocyte
cat	1.15651e-131	0.808337	0.358	0.074	2.41906e-127	Erythrocyte
LOC103381345	1.39107e-128	0.345035	0.53	0.162	2.90971e-124	Erythrocyte
LOC103378260	3.74304e-128	1.2275	0.329	0.063	7.82932e-124	Erythrocyte
fryl	6.76848e-125	1.05118	0.411	0.103	1.41576e-120	Erythrocyte
LOC103377302	5.00767e-124	0.985714	0.327	0.064	1.04745e-119	Erythrocyte
il15ra	1.48576e-122	3.6596	0.569	0.21	3.10777e-118	Erythrocyte
LOC103379859	1.58318e-122	0.705711	0.286	0.049	3.31153e-118	Erythrocyte
selenbp1	1.35743e-120	1.71179	0.354	0.078	2.83934e-116	Erythrocyte
LOC103378681	6.6904e-119	0.836702	0.453	0.131	1.39943e-114	Erythrocyte
tspo	1.29283e-118	5.76399	0.459	0.138	2.70421e-114	Erythrocyte
maf1	4.78633e-118	2.04504	0.747	0.36	1.00116e-113	Erythrocyte
fam78a	4.95967e-118	1.61949	0.32	0.064	1.03741e-113	Erythrocyte
LOC103388098	1.73184e-111	1.96037	0.407	0.112	3.6225e-107	Erythrocyte
LOC103381242	2.76558e-111	0.79415	0.35	0.083	5.78477e-107	Erythrocyte
dlec1	5.86496e-110	0.913712	0.29	0.057	1.22677e-105	Erythrocyte
gsto1	1.93227e-108	5.44106	0.53	0.197	4.04173e-104	Erythrocyte
sdr16c5	6.59396e-106	15.4584	0.627	0.295	1.37926e-101	Erythrocyte
LOC103392683	9.38493e-106	0.439066	0.264	0.048	1.96305e-101	Erythrocyte
LOC103385928	6.48608e-105	0.640675	0.346	0.083	1.35669e-100	Erythrocyte
LOC103384135	3.08465e-101	0.780385	0.28	0.057	6.45217e-97	Erythrocyte
LOC103398716	8.82987e-96	6.70897	0.272	0.059	1.84694e-91	Erythrocyte
cpne3	1.0125e-93	0.60565	0.271	0.057	2.11784e-89	Erythrocyte
usp42	7.62716e-86	0.610981	0.299	0.075	1.59537e-81	Erythrocyte
LOC103384445	8.15142e-86	1.2073	0.4	0.13	1.70503e-81	Erythrocyte
LOC103382782	1.97175e-83	0.697802	0.381	0.119	4.12431e-79	Erythrocyte
LOC103385780	2.37977e-82	0.65984	0.29	0.073	4.97776e-78	Erythrocyte
prdx2	1.55345e-76	18.1577	0.763	0.546	3.24936e-72	Erythrocyte
msrb3	1.02806e-73	0.347185	0.251	0.06	2.15039e-69	Erythrocyte
LOC103379862	9.37522e-71	1.35714	0.291	0.083	1.96102e-66	Erythrocyte
map1lc3a	6.86898e-69	0.887373	0.423	0.165	1.43678e-64	Erythrocyte
ethe1	1.48934e-67	0.500988	0.347	0.116	3.11526e-63	Erythrocyte
vwa5a	1.1043e-66	0.390309	0.272	0.077	2.30987e-62	Erythrocyte
LOC103388093	1.0884e-64	0.558809	0.462	0.192	2.27661e-60	Erythrocyte
LOC103378620	4.7018e-64	0.60554	0.276	0.081	9.83476e-60	Erythrocyte
qars	6.29521e-64	2.19178	0.397	0.159	1.31677e-59	Erythrocyte
cpox	9.09553e-64	0.583511	0.328	0.111	1.90251e-59	Erythrocyte
LOC103388004	1.17162e-61	5.67517	0.447	0.198	2.45069e-57	Erythrocyte
tax1bp1	1.18087e-59	0.758919	0.549	0.28	2.47002e-55	Erythrocyte
LOC103393354	9.83857e-59	1.13848	0.36	0.136	2.05793e-54	Erythrocyte
jak1	2.20058e-58	0.980777	0.294	0.096	4.60296e-54	Erythrocyte
LOC103382314	6.96569e-53	1.93441	0.527	0.282	1.45701e-48	Erythrocyte
blvrb	1.7126e-51	13.0844	0.329	0.134	3.58225e-47	Erythrocyte
LOC103384730	6.8672e-51	0.581588	0.304	0.11	1.43641e-46	Erythrocyte
sqstm1	2.26407e-48	0.405474	0.397	0.175	4.73575e-44	Erythrocyte
oxr1	6.44038e-47	0.527514	0.271	0.096	1.34713e-42	Erythrocyte
hars	6.79952e-45	0.760242	0.355	0.156	1.42226e-40	Erythrocyte
urod	4.4172e-44	11.1653	0.298	0.121	9.23945e-40	Erythrocyte
tmem205	7.1174e-44	0.284049	0.381	0.169	1.48875e-39	Erythrocyte
larp1	1.4411e-43	1.4821	0.371	0.173	3.01434e-39	Erythrocyte
riok3	2.04403e-43	2.61006	0.459	0.24	4.2755e-39	Erythrocyte
LOC103383826	2.06295e-42	0.893842	0.382	0.179	4.31508e-38	Erythrocyte
LOC103393530	1.15691e-41	1.54598	0.447	0.237	2.41991e-37	Erythrocyte
LOC103391287	2.15617e-41	11.002	0.461	0.259	4.51007e-37	Erythrocyte
LOC103396236	1.92112e-39	0.362649	0.256	0.096	4.01841e-35	Erythrocyte
dcaf8	9.51614e-39	0.416386	0.301	0.125	1.99049e-34	Erythrocyte
LOC103391967	5.46662e-37	0.38773	0.381	0.186	1.14345e-32	Erythrocyte
tspan3	1.53514e-35	0.357598	0.425	0.22	3.21105e-31	Erythrocyte
nptn	7.30772e-35	0.646179	0.256	0.103	1.52856e-30	Erythrocyte
arhgap45	8.26912e-35	0.980042	0.367	0.187	1.72965e-30	Erythrocyte
cnot3	2.06215e-31	0.778627	0.312	0.15	4.31341e-27	Erythrocyte
LOC103385194	1.63098e-27	0.31643	0.314	0.155	3.41152e-23	Erythrocyte
tmem256	7.13188e-27	3.7178	0.535	0.368	1.49177e-22	Erythrocyte
LOC103385958	3.7282e-26	1.2068	0.396	0.231	7.79827e-22	Erythrocyte
LOC103385723	4.36714e-25	1.16829	0.305	0.159	9.13475e-21	Erythrocyte
eif5b	3.38012e-22	0.373384	0.298	0.16	7.0702e-18	Erythrocyte
ciapin1	5.26989e-22	1.35469	0.329	0.184	1.1023e-17	Erythrocyte
ghitm	2.2062e-18	0.325526	0.463	0.317	4.6147e-14	Erythrocyte
jade1	7.18835e-18	0.378796	0.274	0.151	1.50359e-13	Erythrocyte
pcmt1	1.28809e-16	0.256781	0.259	0.143	2.6943e-12	Erythrocyte
LOC103381467	8.00507e-15	3.52538	0.268	0.161	1.67442e-10	Erythrocyte
thoc2	2.55375e-13	0.292213	0.299	0.189	5.34167e-09	Erythrocyte
LOC103379915	5.73438e-13	0.401059	0.285	0.176	1.19946e-08	Erythrocyte
LOC103392679	4.25684e-12	1.40881	0.382	0.263	8.90403e-08	Erythrocyte
LOC103391556	5.4374e-12	0.598123	0.291	0.188	1.13734e-07	Erythrocyte
uck1	3.42557e-11	0.320746	0.264	0.168	7.16527e-07	Erythrocyte
LOC103386842	2.15106e-10	1.17072	0.305	0.205	4.49938e-06	Erythrocyte
LOC103388701	5.87498e-10	1.86573	0.489	0.369	1.22887e-05	Erythrocyte
ubxn4	4.00086e-09	0.268635	0.272	0.184	8.3686e-05	Erythrocyte
